# Supplementary material for: The effect of the COVID-19 pandemic on the gender gap in research productivity within academia
Source: eLife. 2023 Jul 6;12:e85427. doi: 10.7554/eLife.85427 (PMC10365834; doi:10.7554/eLife.85427)
Supplement: Supplementary file 1. [file elife-85427-supp1.xlsx]

## Sheet: Data
ID	Article ID	Author	Year	Title	Dates pre-pandemic	Timeframe pre-pandemic	Dates during pandemic	Timeframe during-pandemic	End date of survey	Narrow research field	Broad research field	Self reported or measured	Broad productivity measure	Broad specific productivity	Specific productivity measure	Region	Broad region	Data availability	% women authors pre-pandemic	N pre-pandemic	% women authors during pandemic	N during pandemic	% women survey respondants	Gender accuracy	Gender inference	Effect size type used by study authors	Effect size value given by study author	Additional calculations necessary?	Raw values used in calculation of effect size	Effect size type primary reviewer	Effect size type second reviewer	Effect size type used in MA	Effect size value primary reviewer	Effect size value secondary reviewer	Effect size used in MA	Variance primary reviewer	Variance seconday reviewer	Variance as 95% confidence interval	Variance as standard error	Variance used in MA	Sample size	Date of search	Second reviewer	Notes second reviewer	Notes after review	Data available for parent effect?	Data available for geographic breakdown?	Data available for career stage/age?
1	1	Lerchenmüller et al.	2021	Longitudinal analyses of gender differences in First authorship Publications related to COVID-19	1 February 2019 to 31 January 2020	12	1 February 2020 to 31 January 2021	12	NA	Life sciences	Multidisciplinary	Measured	Publications	Publications	First authorship	Worldwide	Worldwide	Text page 2-3	0.451	483232	0.377	42898	NA	0.9	genderize.io database	NA	NA	No, in text	Proportion with event/Treatment = 0.377, Sample size/Treatment = 42898, Proportion with event/Control =0.451, Sample size/Control = 483232	Standardised mean difference (binary proportions)	Standardised mean difference (binary proportions)	Standardised mean difference (binary proportions)	-0.1685	-0.1685	-0.1685	3.3e-05	3.3e-05	-0.0224	0.00574456	3.3e-05	526130	2021-07-27	A.C.	I would opt for research area as life-sciences. my understadning is that this is not restricted research area. They only used this as COVID-19 research was 'brand new' so they could measure productivity from starting to publishing. But it is accross life sciences (the pre pandemic sample is as such). Second, I think that for the global numbers they have used the full dataset, and then the dataset…	Changed to life sciences. Unsure how to extract separate effect sizes per continent (because there are several continent effect sizes for 6 different timeframes in fig3b and for countries i am unsure how to extract effect sizes from colours in 6a) and per discipline (because i am unsure how to extract effect sizes from colours across 3 different timeframes in fig.2)	No	Maybe (Africa, Asia, Europe, Latin America, North America, Oceania interaction with gender but sample sizes unavailable to generate effect sizes)	No
2	1	Lerchenmüller et al.	2021	Longitudinal analyses of gender differences in First authorship Publications related to COVID-19	1 February 2019 to 31 January 2020	12	1 February 2020 to 31 January 2021	12	NA	Life sciences	Multidisciplinary	Measured	Publications	Publications	Last authorship	Worldwide	Worldwide	Text page 2-3	0.319	483232	0.305	42898	NA	0.9	genderize.io database	NA	NA	No, in text	Proportion with event/Treatment = 0.305, Sample size/Treatment = 42898, Proportion with event/Control =0.319, Sample size/Control = 483232	Standardised mean difference (binary proportions)	Standardised mean difference (binary proportions)	Standardised mean difference (binary proportions)	-0.036	-0.036	-0.036	3.6e-05	3.6e-05	-0.0236	0.006	3.6e-05	526130	2021-07-27	A.C.	I would opt for research area as life-sciences. my understadning is that this is not restricted research area. They only used this as COVID-19 research was 'brand new' so they could measure productivity from starting to publishing. But it is accross life sciences (the pre pandemic sample is as such). Second, I think that for the global numbers they have used the full dataset, and then the dataset…	See above	No	Maybe (Africa, Asia, Europe, Latin America, North America, Oceania interaction with gender but sample sizes unavailable to generate effect sizes)	No
3	2	Williams et al.	2021	Impact of the Coronavirus Disease 2019 Pandemic on Authorship Gender in The Journal of Pediatrics: Disproportionate Productivity by International Male Researchers	Different options to use here, but i have used April-May 2019	1	Different options to use here, but I have used April -May 2020	1	NA	Pediatrics	Medicine	Measured	Submissions	Submissions	Corresponding authorship	Worldwide (tohught separates US vs other)	Worldwide	Table 1	NA	NA	NA	NA	NA	99% & 70%	Gender inference algorithms and human identification	NA	NA	No, in text	Treatment Yes= 260, Treatment No= 262, Control Yes= 181, Control No=142	Standardised mean difference (two by two table)	Standardised mean difference (two by two table)	Standardised mean difference (two by two table)	-0.138	-0.138	-0.138	0.006149	0.006149	-0.3074	0.0784156	0.006149	845	2021-07-27	A.C.	I think we need to probably discuss which of the reported changes to use. Note that this article also separatly reports for Am vs other. So scope for a georgraphical analysis	I agree- we can take 3 effect sizes fo All, International and US (table 1). Regarding the timeframe, i think we should use April-May not January-February as most countries were not in lockdown until after February.	No	Yes (international vs US and interaction with gender)	No
4	3	Bell & Fong	2021	Gender Differences in First and Corresponding Authorship in Public Health Research Submissions During the COVID-19 Pandemic	Dependent on country (before First date of 50 or more confirmed cases) but between January 1 to May 12, 2020,	NA	1 January to 12 May 2020 but exact time adjusted per countrl (start of pandemic defined as 50 or more confimed cases)	NA	NA	Public health	Multidisciplinary	Measured	Submissions	Submissions	Corresponding authorship	Worldwide (tohught separates 6 regions)	Worldwide	Supplementary table A	0.5416	493	0.4799	848	NA	0.95	Gender API	NA	NA	Yes, see "Calculations" sheet	Treatment Yes= 407, Treatment No= 441, Control Yes= 267, Control No=226	Standardised mean difference (two by two table)	Standardised mean difference (two by two table)	Standardised mean difference (two by two table)	-0.1361	-0.1361	-0.1361	0.00392	0.00392	-0.2455	0.0626099	0.00392	1341	2021-07-27	A.C.	not sure about the suitability of broad research field as the Journal seems to be publishing also non-medical research stuff. E.g. public heath law, environmental health etc (2) also, reprots US vs other separately so can be used.	Changed broad research field to multidisciplinary. Agree could split into continents from Supplementary Table A, but these sample sizes are small. How to geographically group them?	No	Yes (Africa Asia Australia/Oceania Europe North America South America and interaction with gender, but sample sizes <20 other than North America)	No
5	4	Quak et al.	2021	Author Gender Inequality in Medical Imaging Journals and the COVID-19 Pandemic	March to May 2018 and 2019	6	March to May 2020	3	NA	Medical imaging	Medicine	Measured	Submissions	Submissions	First authorship	Worldwide (38% europe, 33.3% north america, 23.5% asia)	Worldwide	Table 1	0.316	3711	0.323	2248	NA	NA	Gender-API.com	NA	NA	No, in text	Treatment Yes= 725, Treatment No= 1172, Control Yes= 1523, Control No=2539	Standardised mean difference (two by two table)	Standardised mean difference (two by two table)	Standardised mean difference (two by two table)	0.017	0.017	0.017	0.000998	0.000998	-0.1238	0.0315911	0.000998	5959	2021-07-27	A.C.	Note, provides separate data for 3 regions. gives also data for COVID related research specifically	We would have to take out numbers for separate continents from Figure 1 using web-plot-digitiser, if that is ok?	No	Yes (Africa, Asia, Europe, Middle East, North America, Oceania, South America and interaction with gender)	No
6	4	Quak et al.	2021	Author Gender Inequality in Medical Imaging Journals and the COVID-19 Pandemic	March to May 2018 and 2019	6	March to May 2020	3	NA	Medical imaging	Medicine	Measured	Submissions	Submissions	Last authorship	Worldwide (38% europe, 33.3% north america, 23.5% asia)	Worldwide	Table 1	0.193	3711	0.207	2248	NA	NA	Gender-API.com	NA	NA	No, in text	Treatment Yes= 465, Treatment No= 1783, Control Yes= 717, Control No=2994	Standardised mean difference (two by two table)	Standardised mean difference (two by two table)	Standardised mean difference (two by two table)	0.047	0.047	0.047	0.00135	0.00135	-0.144	0.0367423	0.00135	5959	2021-07-27	A.C.	Note, provides separate data for 3 regions. gives also data for COVID related research specifically	We would have to take out numbers for separate continents from Figure 1 using web-plot-digitiser, if that is ok?	No	Yes (Africa, Asia, Europe, Middle East, North America, Oceania, South America and interaction with gender)	No
10	6	King & Frederickson	2020	The Pandemic Penalty: The Gendered Effects of COVID-19 on Scientific Productivity	Mid March to mid-April 2019	1	Mid March to mid-April 2020	1	NA	bioRxiv	Biological sciences	Measured	Submissions	Preprints	Any authorship	Worldwide	Worldwide	Text page 8	0.372	18047	0.381	24755	NA	NA	R gender package (Mullen 2019)	NA	NA	Yes, see "Calculations" sheet	Treatment Yes= 7189, Treatment No= 27398, Control Yes= 7000, Control No=25750	Standardised mean difference (two by two table)	Standardised mean difference (binary proportions)	Standardised mean difference (binary proportions)	0.0211	-0.0195	-0.0195	0.000109	0.000109	-0.0408	0.0104403	0.000109	67337	2021-07-27	A.C.	highlighted the differences in red	I calculated numbers using data provided in the text. Eg. Page 8 "112 more preprints sole authored by men but just 7 more preprints sole-authored by women in March and April 2020 than in March and April 2019, representing increases of 9.6 percent and 3.7 percent, respectively" can be used to calculated pre and during pandemic numbers of preprints. See "Calculations" sheet for details	No	No	No
11	6	King & Frederickson	2020	The Pandemic Penalty: The Gendered Effects of COVID-19 on Scientific Productivity	Mid March to mid-April 2019	1	Mid March to mid-April 2020	1	NA	bioRxiv	Biological sciences	Measured	Submissions	Preprints	Sole authorship	Worldwide	Worldwide	Text page 8	0.218	78	0.215	107	NA	NA	R gender package (Mullen 2019)	NA	NA	Yes, see "Calculations" sheet	Treatment Yes= 196, Treatment No= 1279, Control Yes= 189, Control No=1167	Standardised mean difference (two by two table)	Standardised mean difference (binary proportions)	Standardised mean difference (binary proportions)	-0.0098	-0.0305	-0.0305	0.003654	0.003657	-0.2371	0.0604731	0.003657	2831	2021-07-27	A.C.	highlighted the differences in red	See above	No	No	No
12	6	King & Frederickson	2020	The Pandemic Penalty: The Gendered Effects of COVID-19 on Scientific Productivity	Mid March to mid-April 2019	1	Mid March to mid-April 2020	1	NA	bioRxiv	Biological sciences	Measured	Submissions	Preprints	First authorship	Worldwide	Worldwide	Text page 8	0.388	245	0.421	309	NA	NA	R gender package (Mullen 2019)	NA	NA	Yes, see "Calculations" sheet	Treatment Yes= 1721, Treatment No= 6004, Control Yes= 1480, Control No=5587	Standardised mean difference (two by two table)	Standardised mean difference (binary proportions)	Standardised mean difference (binary proportions)	0.0756	0.0435	0.0435	0.000487	0.000487	0.0002 - 0.0867	0.0220681	0.000487	14792	2021-07-27	A.C.	highlighted the differences in red	See above	No	No	No
13	6	King & Frederickson	2020	The Pandemic Penalty: The Gendered Effects of COVID-19 on Scientific Productivity	Mid March to mid-April 2019	1	Mid March to mid-April 2020	1	NA	bioRxiv	Biological sciences	Measured	Submissions	Preprints	Middle authorship	Worldwide	Worldwide	Text page 8	0.398	13033	0.397	18445	NA	NA	R gender package (Mullen 2019)	NA	NA	Yes, see "Calculations" sheet	Treatment Yes= 4172, Treatment No= 13562, Control Yes= 4143, Control No=13167	Standardised mean difference (two by two table)	Standardised mean difference (binary proportions)	Standardised mean difference (binary proportions)	-0.0372	-0.0125	-0.0125	0.000192	0.000192	-0.0543	0.0138564	0.000192	35043	2021-07-27	A.C.	highlighted the differences in red	See above	No	No	No
14	6	King & Frederickson	2020	The Pandemic Penalty: The Gendered Effects of COVID-19 on Scientific Productivity	Mid March to mid-April 2019	1	Mid March to mid-April 2020	1	NA	bioRxiv	Biological sciences	Measured	Submissions	Preprints	Last authorship	Worldwide	Worldwide	Text page 8	0.267	2515	0.254	3156	NA	NA	R gender package (Mullen 2019)	NA	NA	Yes, see "Calculations" sheet	Treatment Yes= 1341, Treatment No= 6542, Control Yes= 1333, Control No=5915	Standardised mean difference (two by two table)	Standardised mean difference (binary proportions)	Standardised mean difference (binary proportions)	-0.0199	-0.0522	-0.0522	0.000553	0.000553	-0.0921	0.023516	0.000553	15132	2021-07-27	A.C.	highlighted the differences in red	See above	No	No	No
15	6	King & Frederickson	2020	The Pandemic Penalty: The Gendered Effects of COVID-19 on Scientific Productivity	Mid March to mid-April 2019	1	Mid March to mid-April 2020	1	NA	arXiv physics, math, computer science, and statistics, but it also accepts preprints in electrical engineering and systems science, quantitative finance, economics, and quantitative biology	TEMCP	Measured	Submissions	Preprints	Any authorship	Worldwide	Worldwide	Text page 8	0.213	32561	0.207	34390	NA	NA	R gender package (Mullen 2019)	NA	NA	Yes, see "Calculations" sheet	Treatment Yes= 9513, Treatment No= 15464, Control Yes= 7000, Control No=11139	Standardised mean difference (two by two table)	Standardised mean difference (binary proportions)	Standardised mean difference (binary proportions)	-0.0023	-0.0118	-0.0118	0.000122	0.000122	-0.0433	0.0110454	0.000122	43116	2021-07-27	A.C.	highlighted the differences in red	See above	No	No	No
16	6	King & Frederickson	2020	The Pandemic Penalty: The Gendered Effects of COVID-19 on Scientific Productivity	Mid March to mid-April 2019	1	Mid March to mid-April 2020	1	NA	arXiv physics, math, computer science, and statistics, but it also accepts preprints in electrical engineering and systems science, quantitative finance, economics, and quantitative biology	TEMCP	Measured	Submissions	Preprints	Sole authorship	Worldwide	Worldwide	Text page 8	0.14	1352	0.134	1474	NA	NA	R gender package (Mullen 2019)	NA	NA	Yes, see "Calculations" sheet	Treatment Yes= 23, Treatment No= 85, Control Yes= 17, Control No=62	Standardised mean difference (two by two table)	Standardised mean difference (binary proportions)	Standardised mean difference (binary proportions)	-0.028	-0.0073	-0.0073	0.03958	0.039575	-0.7798	0.198935	0.039575	187	2021-07-27	A.C.	highlighted the differences in red	See above	No	No	No
17	6	King & Frederickson	2020	The Pandemic Penalty: The Gendered Effects of COVID-19 on Scientific Productivity	Mid March to mid-April 2019	1	Mid March to mid-April 2020	1	NA	arXiv physics, math, computer science, and statistics, but it also accepts preprints in electrical engineering and systems science, quantitative finance, economics, and quantitative biology	TEMCP	Measured	Submissions	Preprints	First authorship	Worldwide	Worldwide	Text page 8	0.212	7083	0.211	7708	NA	NA	R gender package (Mullen 2019)	NA	NA	Yes, see "Calculations" sheet	Treatment Yes= 23, Treatment No= 85, Control Yes= 17, Control No=62	Standardised mean difference (two by two table)	Standardised mean difference (binary proportions)	Standardised mean difference (binary proportions)	-0.0033	0.0762	0.0762	0.000923	0.000923	0.0167 - 0.1358	0.0303809	0.000923	5553	2021-07-27	A.C.	highlighted the differences in red	See above	No	No	No
18	6	King & Frederickson	2020	The Pandemic Penalty: The Gendered Effects of COVID-19 on Scientific Productivity	Mid March to mid-April 2019	1	Mid March to mid-April 2020	1	NA	arXiv physics, math, computer science, and statistics, but it also accepts preprints in electrical engineering and systems science, quantitative finance, economics, and quantitative biology	TEMCP	Measured	Submissions	Preprints	Middle authorship	Worldwide	Worldwide	Text page 8	0.225	16864	0.223	17301	NA	NA	R gender package (Mullen 2019)	NA	NA	Yes, see "Calculations" sheet	Treatment Yes= 7393, Treatment No= 11216, Control Yes= 5210, Control No=7882	Standardised mean difference (two by two table)	Standardised mean difference (binary proportions)	Standardised mean difference (binary proportions)	-0.0063	-0.0015	-0.0015	0.000165	0.000165	-0.0503	0.0128452	0.000165	31701	2021-07-27	A.C.	highlighted the differences in red	See above	No	No	No
19	6	King & Frederickson	2020	The Pandemic Penalty: The Gendered Effects of COVID-19 on Scientific Productivity	Mid March to mid-April 2019	1	Mid March to mid-April 2020	1	NA	arXiv physics, math, computer science, and statistics, but it also accepts preprints in electrical engineering and systems science, quantitative finance, economics, and quantitative biology	TEMCP	Measured	Submissions	Preprints	Last authorship	Worldwide	Worldwide	Text page 8	0.188	7276	0.175	7925	NA	NA	R gender package (Mullen 2019)	NA	NA	Yes, see "Calculations" sheet	Treatment Yes= 803, Treatment No= 2364, Control Yes= 677, Control No=1844	Standardised mean difference (two by two table)	Standardised mean difference (binary proportions)	Standardised mean difference (binary proportions)	-0.0483	-0.0429	-0.0429	0.00112	0.001121	-0.1313	0.0334664	0.00112	5689	2021-07-27	A.C.	highlighted the differences in red	See above	No	No	No
24	11	Muric et al.	2021	Gender Disparity in the Authorship of BioMedical Research Publications During the COVID-19 Pandemic: Retrospective Observational Study	January 2019 to 15 March 2020	14.5	15 March 2020 to 2 August 2020	6.5	NA	bioXriv	Biological sciences	Measured	Submissions	Preprints	First authorship	Worldwide	Worldwide	table S3, table S5	0.367	13156.7	0.37	495.626	NA	0.8	Genderize	NA	NA	Yes, see "Calculations" sheet	Treatment Mean= 0.37, Treatment SE=0.004, Treatment Sample size=495.626, Control Mean= 0.367, Control SE=0.008, Control Sample size=13156.66	Standardised mean difference (means and ses)	Standardised mean difference (means and standard errors)	Standardised mean difference (means and standard errors)	0.0033	0.0033	0.0033	0.002094	0.002094	-0.1794	0.0457602	0.002094	13652.3	2021-07-27	A.M.	control = expected number of authors and proportion female authors estimated with OLS pre-pandemic model; treatment = observed during pandemic	See "Calculations" sheet for values used	No	Yes (Australia, Canada, China, France, Germany, India, Italy, Japan, United Kingdom, United States and interaction with gender)	No
25	11	Muric et al.	2021	Gender Disparity in the Authorship of BioMedical Research Publications During the COVID-19 Pandemic: Retrospective Observational Study	January 2019 to 15 March 2020	14.5	15 March 2020 to 2 August 2020	6.5	NA	bioXriv	Biological sciences	Measured	Submissions	Preprints	Last authorship	Worldwide	Worldwide	table S3, table S5	0.235	13156.7	0.233	495.626	NA	0.8	Genderize	NA	NA	Yes, see "Calculations" sheet	Treatment Mean= 0.233, Treatment SE=0.004, Treatment Sample size=495.626, Control Mean= 0.235, Control SE=0.007, Control Sample size=13156.66	Standardised mean difference (means and ses)	Standardised mean difference (means and standard errors)	Standardised mean difference (means and standard errors)	-0.0025	-0.0025	-0.0025	0.002094	0.002094	-0.1793	0.0457602	0.002094	13652.3	2021-07-27	A.M.	control = expected number of authors and proportion female authors estimated with OLS pre-pandemic model; treatment = observed during pandemic	See "Calculations" sheet for values used	No	Yes (Australia, Canada, China, France, Germany, India, Italy, Japan, United Kingdom, United States and interaction with gender)	No
26	11	Muric et al.	2021	Gender Disparity in the Authorship of BioMedical Research Publications During the COVID-19 Pandemic: Retrospective Observational Study	January 2019 to 15 March 2020	14.5	15 March 2020 to 2 August 2020	6.5	NA	bioXriv	Biological sciences	Measured	Submissions	Preprints	Any authorship	Worldwide	Worldwide	table S3, table S5	0.342	13156.7	0.344	495.626	NA	0.8	Genderize	NA	NA	Yes, see "Calculations" sheet	Treatment Mean= 0.344, Treatment SE=0.002, Treatment Sample size=495.626, Control Mean= 0.342, Control SE=0.003, Control Sample size=13156.66	Standardised mean difference (means and ses)	Standardised mean difference (means and standard errors)	Standardised mean difference (means and standard errors)	0.0059	0.0059	0.0059	0.002094	0.002094	-0.1794	0.0457602	0.002094	13652.3	2021-07-27	A.M.	control = expected number of authors and proportion female authors estimated with OLS pre-pandemic model; treatment = observed during pandemic	See "Calculations" sheet for values used	No	Yes (Australia, Canada, China, France, Germany, India, Italy, Japan, United Kingdom, United States and interaction with gender)	No
27	11	Muric et al.	2021	Gender Disparity in the Authorship of BioMedical Research Publications During the COVID-19 Pandemic: Retrospective Observational Study	January 2019 to 15 March 2020	14.5	15 March 2020 to 2 August 2020	6.5	NA	bioXriv	Biological sciences	Measured	Submissions	Preprints	Sole authorship	Worldwide	Worldwide	table S3, table S5	0.209	13156.7	0.165	495.626	NA	0.8	Genderize	NA	NA	Yes, see "Calculations" sheet	Treatment Mean= 0.165, Treatment SE=0.016, Treatment Sample size=495.626, Control Mean= 0.209, Control SE=0.035, Control Sample size=13156.66	Standardised mean difference (means and ses)	Standardised mean difference (means and standard errors)	Standardised mean difference (means and standard errors)	-0.0112	-0.0112	-0.0112	0.002094	0.002094	-0.1793	0.0457602	0.002094	13652.3	2021-07-27	A.M.	control = expected number of authors and proportion female authors estimated with OLS pre-pandemic model; treatment = observed during pandemic	See "Calculations" sheet for values used	No	Yes (Australia, Canada, China, France, Germany, India, Italy, Japan, United Kingdom, United States and interaction with gender)	No
28	11	Muric et al.	2021	Gender Disparity in the Authorship of BioMedical Research Publications During the COVID-19 Pandemic: Retrospective Observational Study	January 2019 to 15 March 2020	14.5	15 March 2020 to 2 August 2020	6.5	NA	medRxiv	Medicine	Measured	Submissions	Preprints	First authorship	Worldwide	Worldwide	table S3, table S5	0.335	2165.89	0.3	198.779	NA	0.8	Genderize	NA	NA	Yes, see "Calculations" sheet	Treatment Mean= 0.3, Treatment SE=0.009, Treatment Sample size=198.779, Control Mean= 0.367, Control SE=0.055, Control Sample size=2165.893	Standardised mean difference (means and ses)	Standardised mean difference (means and standard errors)	Standardised mean difference (means and standard errors)	-0.0143	-0.0143	-0.0143	0.005492	0.005492	-0.2905	0.074108	0.005492	2364.67	2021-07-27	A.M.	control = expected number of authors and proportion female authors estimated with OLS pre-pandemic model; treatment = observed during pandemic	See "Calculations" sheet for values used	No	Yes (Australia, Canada, China, France, Germany, India, Italy, Japan, United Kingdom, United States and interaction with gender)	No
29	11	Muric et al.	2021	Gender Disparity in the Authorship of BioMedical Research Publications During the COVID-19 Pandemic: Retrospective Observational Study	January 2019 to 15 March 2020	14.5	15 March 2020 to 2 August 2020	6.5	NA	medRxiv	Medicine	Measured	Submissions	Preprints	Last authorship	Worldwide	Worldwide	table S3, table S5	0.309	2165.89	0.23	198.779	NA	0.8	Genderize	NA	NA	Yes, see "Calculations" sheet	Treatment Mean= 0.23, Treatment SE=0.005, Treatment Sample size=198.779, Control Mean= 0.309, Control SE=0.038, Control Sample size=2165.893	Standardised mean difference (means and ses)	Standardised mean difference (means and standard errors)	Standardised mean difference (means and standard errors)	-0.0467	-0.0467	-0.0467	0.005493	0.005493	-0.2905	0.0741148	0.005493	2364.67	2021-07-27	A.M.	control = expected number of authors and proportion female authors estimated with OLS pre-pandemic model; treatment = observed during pandemic	See "Calculations" sheet for values used	No	Yes (Australia, Canada, China, France, Germany, India, Italy, Japan, United Kingdom, United States and interaction with gender)	No
30	11	Muric et al.	2021	Gender Disparity in the Authorship of BioMedical Research Publications During the COVID-19 Pandemic: Retrospective Observational Study	January 2019 to 15 March 2020	14.5	15 March 2020 to 2 August 2020	6.5	NA	medRxiv	Medicine	Measured	Submissions	Preprints	Any authorship	Worldwide	Worldwide	table S3, table S5	0.376	2165.89	0.348	198.779	NA	0.8	Genderize	NA	NA	Yes, see "Calculations" sheet	Treatment Mean= 0.348, Treatment SE=0.005, Treatment Sample size=198.779, Control Mean= 0.376, Control SE=0.016, Control Sample size=2165.893	Standardised mean difference (means and ses)	Standardised mean difference (means and standard errors)	Standardised mean difference (means and standard errors)	-0.0393	-0.0393	-0.0393	0.005493	0.005493	-0.1453	0.0741148	0.005493	2364.67	2021-07-27	A.M.	control = expected number of authors and proportion female authors estimated with OLS pre-pandemic model; treatment = observed during pandemic	See "Calculations" sheet for values used	No	Yes (Australia, Canada, China, France, Germany, India, Italy, Japan, United Kingdom, United States and interaction with gender)	No
31	11	Muric et al.	2021	Gender Disparity in the Authorship of BioMedical Research Publications During the COVID-19 Pandemic: Retrospective Observational Study	January 2019 to 15 March 2020	14.5	15 March 2020 to 2 August 2020	6.5	NA	Springer-Nature	Multidisciplinary	Measured	Publications	Publications	First authorship	Worldwide	Worldwide	table S3, table S5	0.458	4770.88	0.438	195.95	NA	0.8	Genderize	NA	NA	Yes, see "Calculations" sheet	Treatment Mean= 0.438, Treatment SE=0.014, Treatment Sample size=195.95, Control Mean= 0.458, Control SE=0.011, Control Sample size=4770.883	Standardised mean difference (means and ses)	Standardised mean difference (means and standard errors)	Standardised mean difference (means and standard errors)	-0.0268	-0.0268	-0.0268	0.005313	0.005313	-0.2857	0.0728903	0.005313	4966.83	2021-07-27	A.M.	control = expected number of authors and proportion female authors estimated with OLS pre-pandemic model; treatment = observed during pandemic	See "Calculations" sheet for values used	No	Yes (Australia, Canada, China, France, Germany, India, Italy, Japan, United Kingdom, United States and interaction with gender)	No
32	11	Muric et al.	2021	Gender Disparity in the Authorship of BioMedical Research Publications During the COVID-19 Pandemic: Retrospective Observational Study	January 2019 to 15 March 2020	14.5	15 March 2020 to 2 August 2020	6.5	NA	Springer-Nature	Multidisciplinary	Measured	Publications	Publications	Last authorship	Worldwide	Worldwide	table S3, table S5	0.315	4770.88	0.275	195.95	NA	0.8	Genderize	NA	NA	Yes, see "Calculations" sheet	Treatment Mean= 0.275, Treatment SE=0.011, Treatment Sample size=195.95, Control Mean= 0.315, Control SE=0.008, Control Sample size=4770.883	Standardised mean difference (means and ses)	Standardised mean difference (means and standard errors)	Standardised mean difference (means and standard errors)	-0.0737	-0.0737	-0.0737	0.005313	0.005313	-0.2857	0.0728903	0.005313	4966.83	2021-07-27	A.M.	control = expected number of authors and proportion female authors estimated with OLS pre-pandemic model; treatment = observed during pandemic	See "Calculations" sheet for values used	No	Yes (Australia, Canada, China, France, Germany, India, Italy, Japan, United Kingdom, United States and interaction with gender)	No
33	11	Muric et al.	2021	Gender Disparity in the Authorship of BioMedical Research Publications During the COVID-19 Pandemic: Retrospective Observational Study	January 2019 to 15 March 2020	14.5	15 March 2020 to 2 August 2020	6.5	NA	Springer-Nature	Multidisciplinary	Measured	Publications	Publications	Any authorship	Worldwide	Worldwide	table S3, table S5	0.39	4770.88	0.382	195.95	NA	0.8	Genderize	NA	NA	Yes, see "Calculations" sheet	Treatment Mean= 0.382, Treatment SE=0.007, Treatment Sample size=195.95, Control Mean= 0.39, Control SE=0.006, Control Sample size=4770.883	Standardised mean difference (means and ses)	Standardised mean difference (means and standard errors)	Standardised mean difference (means and standard errors)	-0.0197	-0.0197	-0.0197	0.005313	0.005313	-0.2857	0.0728903	0.005313	4966.83	2021-07-27	A.M.	control = expected number of authors and proportion female authors estimated with OLS pre-pandemic model; treatment = observed during pandemic	See "Calculations" sheet for values used	No	Yes (Australia, Canada, China, France, Germany, India, Italy, Japan, United Kingdom, United States and interaction with gender)	No
34	11	Muric et al.	2021	Gender Disparity in the Authorship of BioMedical Research Publications During the COVID-19 Pandemic: Retrospective Observational Study	January 2019 to 15 March 2020	14.5	15 March 2020 to 2 August 2020	6.5	NA	Springer-Nature	Multidisciplinary	Measured	Publications	Publications	Sole authorship	Worldwide	Worldwide	table S3, table S5	0.284	4770.88	0.299	195.95	NA	0.8	Genderize	NA	NA	Yes, see "Calculations" sheet	Treatment Mean= 0.299, Treatment SE=0.029, Treatment Sample size=195.95, Control Mean= 0.284, Control SE=0.04, Control Sample size=4770.883	Standardised mean difference (means and ses)	Standardised mean difference (means and standard errors)	Standardised mean difference (means and standard errors)	0.0055	0.0055	0.0055	0.005313	0.005313	-0.2857	0.0728903	0.005313	4966.83	2021-07-27	A.M.	control = expected number of authors and proportion female authors estimated with OLS pre-pandemic model; treatment = observed during pandemic	See "Calculations" sheet for values used	No	Yes (Australia, Canada, China, France, Germany, India, Italy, Japan, United Kingdom, United States and interaction with gender)	No
36	13	Fox & Meyer	2021	The influence of the global COVID-19 pandemic on manuscript Submissions and editor and reviewer performance at six ecology journals	15 March-1 October 2019	5.5	15 March-1 October 2020	5.5	NA	Ecology	Biological sciences	Measured	Submissions	Submissions	First authorship	Worldwide (BES journals)	Worldwide	text,p7-8;Figure3	0.399	2803	0.41	3239	NA	NA	Genderize	NA	NA	No, in text	Proportion with event/Treatment = 0.41, Sample size/Treatment = 3239, Proportion with event/Control =0.399, Sample size/Control = 2803	Standardised mean difference (binary proportions)	Standardised means, binary proportions	Standardised means, binary proportions	0.0252	0.0252	0.0252	0.00084	0.00084	-0.1136	0.0289828	0.00084	6042	2021-07-27	A.M.	a different pre/post covid analysis gives different values, with a decrease in % female first authors when comparing post-15 March in 2020 to pre-15 March in 2020 (see p.7; but no sample size for jan-mar 2020)	NA	No	No	No
37	13	Fox & Meyer	2021	The influence of the global COVID-19 pandemic on manuscript Submissions and editor and reviewer performance at six ecology journals	15 March-1 October 2019	5.5	15 March-1 October 2020	5.5	NA	Ecology	Biological sciences	Measured	Submissions	Submissions	Corresponding authorship	Worldwide (BES journals)	Worldwide	text,p7-8;Figure3	0.386	2803	0.401	3239	NA	NA	Genderize	NA	NA	No, in text	Proportion with event/Treatment = 0.401, Sample size/Treatment = 3239, Proportion with event/Control =0.386, Sample size/Control = 2803	Standardised mean difference (binary proportions)	Standardised means, binary proportions	Standardised means, binary proportions	0.0347	0.0347	0.0347	0.000848	0.000848	-0.1141	0.0291204	0.000848	6042	2021-07-27	A.M.		NA	No	No	No
38	14	Cui et al.	2021	Gender Inequality in Research Productivity During the COVID-19 Pandemic	3 Dec 2019 - 11 March 2020	3	11 March 2020 - 19 May 2020	3	NA	SSRN repository (18 disciplines within Social sciences)	Social sciences	Measured	Submissions	Preprints	Any authorship	Worldwide	Worldwide	Table3 (10 weeks post-lockdown); p8	0.296496	779.1	0.264028	1015.8	NA	0.8	Genderize	Percentage change in number of preprints as predicted by mixed-effect model	-0.15	No, in text	NA	NA	NA	NA	NA	NA	-0.15	NA	NA	NA	0.064	0.004096	41858	2021-07-27	A.M.	pre/post lockdown adjusted per country whenever lockdown came at a different date from 11 March 2020; I used 10 weeks post-lockdown values but possible to get 6-9 weeks post-lockdown too (do not differ much)	Use aggreggated data	No	Yes (Japan, China, Australia, Italy, Switzerland, Netherlands, New Zealand, UK, Russia, India, Spain, Norway, US, Indonesia, Germany, Canada, Malaysia, Romania, France, Israel, Denmark, Korea, Beligum, Colombia, Singapore and interaction with gender)	Yes (Student, Assistant professor, Associate professor, Full professor and interaction with gender)
39	15	Wehner et al.	2020	Comparison of the Proportions of Female and Male Corresponding Authors in Preprint Research Repositories before and during the COVID-19 Pandemic	from 6 June 2019 -	NA	until 5 May 2020	NA	NA	medRxiv	Medicine	Measured	Submissions	Preprints	Corresponding authorship	Worldwide	Worldwide	p1,3	NA	NA	NA	NA	NA	NA	Gender API	Percentage change in corresponding authors predicted by Somers D	-0.14	No, in text	NA	NA	NA	NA	NA	NA	-0.14	NA		-0.03 to -0.24	0.00306122	0.000009371095377	5148	2021-07-27	A.M.	values also available specifically for USA / non USA (USA: n=1377; ES=-0.04; CI=-0.07 to 0.15 / non-USA: n=3804; ES=-0.17; CI=0.01 to 0.23)	Effect sizes for US vs non-US readily available and easy to calculate, I may extract these later	No	Yes (US vs Non-US and interaction with gender)	No
40	15	Wehner et al.	2020	Comparison of the Proportions of Female and Male Corresponding Authors in Preprint Research Repositories before and during the COVID-19 Pandemic	from 1 January 2020-	NA	until 20 May 2020	NA	NA	bioRxiv	Biological sciences	Measured	Submissions	Preprints	Corresponding authorship	Worldwide	Worldwide	p1,3	NA	NA	NA	NA	NA	NA	Gender API	Percentage change in corresponding authors predicted by Somers D	-0.06	No, in text	NA	NA	NA	NA	NA	NA	-0.06	NA		0.01 to -0.12	0.0663265	0.00439921	46101	2021-07-27	A.M.	values also available specifically for USA / non USA (USA: n=17996; ES=-0.01; CI=-0.05 to 0.07 / non-USA: n=23209; ES=-0.04; CI=-0.02 to 0.10)	Effect sizes for US vs non-US readily available and easy to calculate, I may extract these later	No	Yes (US vs Non-US and interaction with gender)	No
41	16	Defilippis et al.	2021	Gender differences in publication authorship during covid-19: A bibliometric analysis of high-impact cardiology journals	1 March - 1 June 2019	3	1 March - 1 June 2020	3	NA	Cardiology, 4 select high-impact journals	Medicine	Measured	Publications	Publications	First authorship	Worldwide	Worldwide	Table1	0.223	788	0.274	838	NA	0.95	Genderize	NA	NA	No, in text	Treatment Yes= 230, Treatment No= 608, Control Yes= 176, Control No=612	Standardised mean difference (two by two frequency table)	Standardised mean difference (two by two frequency table	Standardised mean difference (two by two frequency table	0.1511	0.1511	0.1511	0.004045	0.004045	0.0265-0.2758	0.0636003	0.004045	1626	2021-07-27	A.M.	specific ES available per type publication (increase in % female first authors for editorials, but decrease in % female first authors for original research articles)	Used overall publications because we don't split these up in other effect sizes	No	No	No
42	16	Defilippis et al.	2021	Gender differences in publication authorship during covid-19: A bibliometric analysis of high-impact cardiology journals	1 March - 1 June 2019	3	1 March - 1 June 2020	3	NA	Cardiology, 4 select high-impact journals	Medicine	Measured	Publications	Publications	Last authorship	Worldwide	Worldwide	Table1	0.15	661	0.193	716	NA	0.95	Genderize	NA	NA	No, in text	Treatment Yes= 138, Treatment No= 578, Control Yes= 99, Control No=562	Standardised mean difference (two by two frequency table)	Standardised mean difference (two by two frequency table	Standardised mean difference (two by two frequency table	0.1676	0.1676	0.1676	0.00634	0.00634	0.0116-0.3237	0.0796241	0.00634	1377	2021-07-27	A.M.		Used overall publications because we don't split these up in other effect sizes	No	No	No
43	17	Nguyen et al.	2021	Impact of COVID-19 on longitudinal ophthalmology authorship gender trends	1 January 2019 to 9 July 2019	6	1 January 2020 to 9 July 2020	6	NA	Ophtalmology	Medicine	Measured	Publications	Publications	Any authorship	Worldwide	Worldwide	Table1	0.354	33049	0.294	1925	NA	0.99	Gender API	NA	NA	No, in text	Treatment Yes= 566, Treatment No= 1359, Control Yes= 11697, Control No=21352	Standardised mean difference (two by two frequency table)	Standardised mean difference (two by two frequency table	Standardised mean difference (two by two frequency table	-0.1511	-0.1511	-0.1511	0.000801	0.000801	-0.111	0.0283019	0.000801	34974	2021-07-27	A.M.			No	Maybe (but difficult to extract)	No
44	17	Nguyen et al.	2021	Impact of COVID-19 on longitudinal ophthalmology authorship gender trends	1 January 2019 to 9 July 2019	6	1 January 2020 to 9 July 2020	6	NA	Ophtalmology	Medicine	Measured	Publications	Publications	First authorship	Worldwide	Worldwide	Table1	0.372	6473	0.296	402	NA	0.99	Gender API	NA	NA	No, in text	Treatment Yes= 119, Treatment No= 283, Control Yes= 2408, Control No=4065	Standardised mean difference (two by two frequency table)	Standardised mean difference (two by two frequency table	Standardised mean difference (two by two frequency table	-0.1889	-0.1889	-0.1889	0.003829	0.003829	-0.2425	0.0618789	0.003829	6875	2021-07-27	A.M.			No	Maybe (but difficult to extract)	No
45	17	Nguyen et al.	2021	Impact of COVID-19 on longitudinal ophthalmology authorship gender trends	1 January 2019 to 9 July 2019	6	1 January 2020 to 9 July 2020	6	NA	Ophtalmology	Medicine	Measured	Publications	Publications	Middle authorship	Worldwide	Worldwide	Table1	0.367	20570	0.315	1179	NA	0.99	Gender API	NA	NA	No, in text	Treatment Yes= 371, Treatment No= 808, Control Yes= 7552, Control No=13018	Standardised mean difference (two by two frequency table)	Standardised mean difference (two by two frequency table	Standardised mean difference (two by two frequency table	-0.1289	-0.1289	-0.1289	0.001259	0.001259	-0.1391	0.0354824	0.001259	21749	2021-07-27	A.M.			No	Maybe (but difficult to extract)	No
46	17	Nguyen et al.	2021	Impact of COVID-19 on longitudinal ophthalmology authorship gender trends	1 January 2019 to 9 July 2019	6	1 January 2020 to 9 July 2020	6	NA	Ophtalmology	Medicine	Measured	Publications	Publications	Last authorship	Worldwide	Worldwide	Table1	0.289	6006	0.221	344	NA	0.99	Gender API	NA	NA	No, in text	Treatment Yes= 76, Treatment No= 268, Control Yes= 1737, Control No=4269	Standardised mean difference (two by two frequency table)	Standardised mean difference (two by two frequency table	Standardised mean difference (two by two frequency table	-0.199	-0.199	-0.199	0.00538	0.00538	-0.2875	0.0733485	0.00538	6350	2021-07-27	A.M.			No	Maybe (but difficult to extract)	No
47	18	Andersen et al.	2020	Meta-Research: COVID-19 Medical papers have fewer women First authors than expected	1 January 2019 - 31 December 2019	12	1 January 2020 and 5 June 2020	5	NA	Covid 19	Medicine	Measured	Publications	Publications	First authorship	USA	North America	Results page 3	0.38	85373	0.33	1929	NA	NA	Gender API	NA	NA	No, in text	Treatment Proportion with event= 0.3263970969, Treatment Sample Size= 1929, Control Proportion with event= 0.379841519, Control sample size= 85373	Standardised mean difference (from binary proportions)	Standardised mean difference (from binary proportions) (38.0 vs 32.6)	Standardised mean difference (from binary proportions) (38.0 vs 32.6)	-0.129	-0.1292	-0.1292	0.000745	0.000732	-0.107	0.0270555	0.000732	87266	2021-07-27	D.L.	Calculated numbers for each section in Table 1 and added them up; used logit method for d	Agreed, made a separate sheet for these calculations called, "Calculations".	No	No	No
48	18	Andersen et al.	2020	Meta-Research: COVID-19 Medical papers have fewer women First authors than expected	1 January 2019 - 31 December 2019	12	1 January 2020 and 5 June 2020	5	NA	Covid 19	Medicine	Measured	Publications	Publications	Last authorship	USA	North America	Results page 3	0.35	85373	0.34	1929	NA	NA	Gender API	NA	NA	No, in text	Treatment Proportion with event= 0.3349663038, Treatment Sample Size= 1929, Control Proportion with event= 0.2839364905, Control sample size= 85373	Standardised mean difference (from binary proportions)	Standardised mean difference (from binary proportions) (35.1 vs 33.5)	Standardised mean difference (from binary proportions) (35.1 vs 33.5)	-0.0377	-0.0135	-0.0135	0.000736	0.000801	-0.1063	0.0283019	0.000801	87266	2021-07-27	D.L.	Calculated numbers for each section in Table 1 and added them up; used logit method for d	Agreed, made a separate sheet for these calculations called, "Calculations".	No	No	No
49	18	Andersen et al.	2020	Meta-Research: COVID-19 Medical papers have fewer women First authors than expected	1 January 2019 - 31 December 2019	12	1 January 2020 and 5 June 2020	5	NA	Covid 19	Medicine	Measured	Publications	Publications	Any authorship	USA	North America	Results page 3	0.28	85373	0.28	1929	NA	NA	Gender API	NA	NA	Yes, see "Calculations" sheet	Treatment Proportion with event= 0.3349663038, Treatment Sample Size= 1929, Control Proportion with event= 0.3508699472, Control sample size= 85373	Standardised mean difference (from binary proportions)	Standardised mean difference (from binary proportions) (28.4 vs 28.0)	Standardised mean difference (from binary proportions) (28.4 vs 28.0)	-0.0108	-0.0389	-0.0389	0.000814	0.000723	-0.1118	0.0268887	0.000723	87266	2021-07-27	D.L.	Calculated numbers for each section in Table 1 and added them up; used logit method for d	Agreed, made a separate sheet for these calculations called, "Calculations".	No	No	No
53	22	Cook et al.	2021	Gender differences in authorship of obstetrics and gynecology Publications during the coronavirus disease 2019 pandemic	1 January 2020 - 28 February 2020	2	1 March 2020 - 31 June 2020	3	NA	Gynecology	Medicine	Measured	Publications	Publications	First authorship	Worldwide	Worldwide	Results page 1	0.65	228	0.62	427	NA	NA	Author inferred	NA	NA	No, in text	Treatment Yes= 265, Treatment No= 148, Control Yes= 162, Control No=80	Standardised mean difference (two by two table)	Standardised mean difference (two by two table) (men 80 vs 162; women 148 vs 265)	Standardised mean difference (two by two table) (men 80 vs 162; women 148 vs 265)	-0.0678	-0.0678	-0.0678	0.008877	0.008877	-0.3693	0.0942178	0.008877	655	2021-07-27	D.L.	Based on numbers in Table 1	I understand this	No	No	Maybe (but no interaction with gender studied)
54	23	Ribarovska et al.	2021	Gender inequality in publishing during the COVID-19 pandemic	1 July 2019 - 31 January 2020	6	1 July 2020 - 31 January 2021	6	NA	Neuroimmunology	Medicine	Measured	Publications	Publications	First authorship	Worldwide (but authors in BBI are mostly from US, then China, then UK, then Germany https://journalinsights.elsevier.com/journals/0889-1591/authors)	Worldwide	Results page 1	0.62	265	0.5	440	NA	NA	Author inferred	NA	NA	Yes, see "Calculations" sheet	Treatment Proportion with event= 0.5, Treatment Sample Size= 265, Control Proportion with event= 0.62, Control sample size= 265	Standardised mean difference (two by two table)	Standardised mean difference (binary proportions)	Standardised mean difference (binary proportions)	-0.2673	-0.2699	-0.2699	0.007626	0.009457	-0.3423	0.0972471	0.009457	705	2021-07-27	D.L.	Treatment = pandemic; yes = women	For proportions of female and male first authors during covid I use 0.5 and 0.5 as described in the text. I assume number of papers during covid matches the number of papers pre-covid (265).	No	No	No
55	23	Ribarovska et al.	2021	Gender inequality in publishing during the COVID-19 pandemic	1 July 2019 - 31 January 2020	6	1 July 2020 - 31 January 2021	6	NA	Neuroimmunology	Medicine	Measured	Publications	Publications	Last authorship	Worldwide (but authors in BBI are mostly from US, then China, then UK, then Germany https://journalinsights.elsevier.com/journals/0889-1591/authors)	Worldwide	Results page 1	0.42	265	0.33	440	NA	NA	Author inferred	NA	NA	Yes, see "Calculations" sheet	Treatment Proportion with event= 0.5, Treatment Sample Size= 265, Control Proportion with event= 0.62, Control sample size= 265	Standardised mean difference (two by two table)	Standardised mean difference (binary proportions)	Standardised mean difference (binary proportions)	-0.2111	-0.2125	-0.2125	0.007839	0.009897	-0.3471	0.0994837	0.009897	705	2021-07-27	D.L.	Treatment = pandemic; yes = women	For proportions of female and male first authors during covid I assume numbers of articles published per month are equal and take the mean proportion of all months. I assume number of papers during covid matches the number of papers pre-covid (265).	No	No	No
56	24	Cushman	2020	Gender gap in women authors is not worse during COVID-19 pandemic: Results from Research and Practice in Thrombosis and Haemostasis	1 March 2019 - 21 May 2019	3	1 March 2020 - 21 May 2020	3	NA	Thrombosis	Medicine	Measured	Submissions	Submissions	First authorship	Worldwide	Worldwide	Results page 1	0.333	15	0.351	74	NA	NA	Self-reported	NA	NA	Yes, see "Calculations" sheet	Treatment Yes= 26, Treatment No= 5, Control Yes= 48, Control No=10	Standardised mean difference (two by two table)	Standardised mean difference (two by two table) (men 10 vs 48; women 26 vs 48)	Standardised mean difference (two by two table) (men 10 vs 48; women 26 vs 48)	0.0441	0.0441	0.0441	0.109213	0.109213	-1.2954	0.330474	0.109213	89	2021-07-27	D.L.	Treatment = pandemic; yes = women	I think I understand this but should it not be (men 10 vs 48; women 5 vs 26) - see "Calculations" sheet	No	No	No
57	24	Cushman	2020	Gender gap in women authors is not worse during COVID-19 pandemic: Results from Research and Practice in Thrombosis and Haemostasis	1 March 2019 - 21 May 2019	3	1 March 2020 - 21 May 2020	3	NA	Thrombosis	Medicine	Measured	Submissions	Submissions	Corresponding authorship	Worldwide	Worldwide	Results page 1	0.4	15	0.378	74	NA	NA	Self-reported	NA	NA	Yes, see "Calculations" sheet	Treatment Yes= 28, Treatment No= 6, Control Yes= 46, Control No=9	Standardised mean difference (two by two table)	Standardised mean difference (two by two table) (men 9 vs 46; women 6 vs 28)	Standardised mean difference (two by two table) (men 9 vs 46; women 6 vs 28)	-0.0502	-0.0502	-0.0502	0.101898	0.101898	-1.2513	0.319215	0.101898	89	2022-02-28	D.L.	Treatment = pandemic; yes = women	I understand this	No	No	No
58	25	Ipe et al.	2021	The impact of COVID-19 on academic productivity by female physicians and researchers in transfusion medicine	1 July 2019 - 31 July 2019	1	1 July 2020 - 31 July 2020	1	NA	Transfusion	Medicine	Measured	Publications	Publications	First authorship	Worldwide	Worldwide	Figure 2	0.491	505	0.427	492	NA	0.8	Gender API	NA	NA	Yes, see "Calculations" sheet	Treatment Yes= 210, Treatment No= 248, Control Yes= 181, Control No=257	Standardised mean difference (two by two table)	Standardised mean difference (two by two table) (men 257 vs 282; women 248 vs 210)	Standardised mean difference (two by two table) (men 257 vs 282; women 248 vs 210)	-0.1429	-0.1429	-0.1429	0.004934	0.004934	-0.2753	0.0702424	0.004934	997	2022-02-28	D.L.	Treatment = pandemic; yes = women	I understand this	No	No	No
59	25	Ipe et al.	2021	The impact of COVID-19 on academic productivity by female physicians and researchers in transfusion medicine	1 July 2019 - 31 July 2019	1	1 July 2020 - 31 July 2020	1	NA	Transfusion	Medicine	Measured	Publications	Publications	Last authorship	Worldwide	Worldwide	Figure 2	0.354	512	0.355	493	NA	0.8	Gender API	NA	NA	Yes, see "Calculations" sheet	Treatment Yes= 210, Treatment No= 248, Control Yes= 181, Control No=257	Standardised mean difference (two by two table)	Standardised mean difference (two by two table) (men 331 vs 318; women 181 vs 175	Standardised mean difference (two by two table) (men 331 vs 318; women 181 vs 175	0.0035	0.0035	0.0035	0.00529	0.00529	-0.2852	0.0727324	0.00529	1005	2022-02-28	D.L.	Treatment = pandemic; yes = women	I understand this	No	No	No
61	27	Anabaraonye et al.	2022	Impact of the Early COVID-19 Pandemic on Gender Participation in Academic Publishing in Radiation Oncology	December 2015- March 1 2020	50	March 1 2020- end of May 2020	3	NA	Radiation oncology	Medicine	Measured	Publications	Publications	First authorship	Worldwide (but authors in Advances in radiation oncology are 79.2% (572/722) from North America https://journalinsights.elsevier.com/journals/2452-1094/authors)	Worldwide	Table 1	0.347826	828	0.296875	128	NA	NA	Manual internet search	NA	NA	Yes, see "Calculations" sheet	Treatment Yes= 38, Treatment No= 90, Control Yes= 288, Control No=540	Standardised mean difference (two by two table)	Standardised mean difference (two by two table)	Standardised mean difference (two by two table)	-0.1288	NA	-0.1288	0.012995		-0.4468	0.113996	0.012995	1866	2022-02-28				No	No	Yes (senior vs non-senior and interaction with gender)
62	27	Anabaraonye et al.	2022	Impact of the Early COVID-19 Pandemic on Gender Participation in Academic Publishing in Radiation Oncology	December 2015- March 1 2020	50	March 1 2020- end of May 2020	3	NA	Radiation oncology	Medicine	Measured	Publications	Publications	Corresponding authorship	Worldwide (but authors in Advances in radiation oncology are 79.2% (572/722) from North America https://journalinsights.elsevier.com/journals/2452-1094/authors)	Worldwide	Table 2	0.255754	782	0.28125	128	NA	NA	Manual internet search	NA	NA	Yes, see "Calculations" sheet	Treatment Yes= 39, Treatment No= 92, Control Yes= 200, Control No=582	Standardised mean difference (two by two table)	Standardised mean difference (two by two table)	Standardised mean difference (two by two table)	0.0716	NA	0.0716	0.013789		-0.4603	0.117427	0.013789	1866	2022-02-28				No	No	Yes (senior vs non-senior and interaction with gender)
63	28	Jemielniak et al.	2022	COVID-19 effect on the gender gap in academic publishing	2019	12	2021	12	NA	psychology	Social sciences	Measured	Publications	Publications	First authorship	Worldwide	Worldwide	Sent upon request	0.534276	17184	0.185306	19681	NA	0.8	Gender guesser library, then gender guesser on a name where diacritic were converted to ASCII (using unidecode python package), then looked in a database collected from https://github.com/MatthiasWinkelmann/name-database, then using database of Chinese names https://github.com/psychbruce/ Chinese Names	NA	NA	Yes, see "Calculations" sheet	Treatment Yes= 3647, Treatment No= 16034, Control Yes= 9181, Control No=8003	Standardised mean difference (two by two table)	Standardised mean difference (two by two table)	Standardised mean difference (two by two table)	-0.7407	NA	-0.7407	0.000173		-0.0516	0.0131529	0.000173	36865	2022-02-28				No	No	No
64	28	Jemielniak et al.	2022	COVID-19 effect on the gender gap in academic publishing	2019	12	2021	12	NA	mathematics	TEMCP	Measured	Publications	Publications	First authorship	Worldwide	Worldwide	Sent upon request	0.181725	29165	0.170982	2240	NA	0.8	Gender guesser library, then gender guesser on a name where diacritic were converted to ASCII (using unidecode python package), then looked in a database collected from https://github.com/MatthiasWinkelmann/name-database, then using database of Chinese names https://github.com/psychbruce/ Chinese Names	NA	NA	Yes, see "Calculations" sheet	Treatment Yes= 383, Treatment No= 1857, Control Yes= 5300, Control No=23865	Standardised mean difference (two by two table)	Standardised mean difference (two by two table)	Standardised mean difference (two by two table)	-0.0408	NA	-0.0408	0.001027		-0.1256	0.0320468	0.001027	31405	2022-02-28				No	No	No
65	28	Jemielniak et al.	2022	COVID-19 effect on the gender gap in academic publishing	2019	12	2021	12	NA	philopsophy	Social sciences	Measured	Publications	Publications	First authorship	Worldwide	Worldwide	Sent upon request	0.30833	5666	0.260129	1703	NA	0.8	Gender guesser library, then gender guesser on a name where diacritic were converted to ASCII (using unidecode python package), then looked in a database collected from https://github.com/MatthiasWinkelmann/name-database, then using database of Chinese names https://github.com/psychbruce/ Chinese Names	NA	NA	Yes, see "Calculations" sheet	Treatment Yes= 443, Treatment No= 1260, Control Yes= 1747, Control No=3919	Standardised mean difference (two by two table)	Standardised mean difference (two by two table)	Standardised mean difference (two by two table)	-0.1309	NA	-0.1309	0.001179		-0.1346	0.0343366	0.001179	7369	2022-02-28				No	No	No
66	28	Jemielniak et al.	2022	COVID-19 effect on the gender gap in academic publishing	2019	12	2021	12	NA	materials science	TEMCP	Measured	Publications	Publications	First authorship	Worldwide	Worldwide	Sent upon request	0.266353	16388	0.249439	8463	NA	0.8	Gender guesser library, then gender guesser on a name where diacritic were converted to ASCII (using unidecode python package), then looked in a database collected from https://github.com/MatthiasWinkelmann/name-database, then using database of Chinese names https://github.com/psychbruce/ Chinese Names	NA	NA	Yes, see "Calculations" sheet	Treatment Yes= 2111, Treatment No= 6352, Control Yes= 4365, Control No=12023	Standardised mean difference (two by two table)	Standardised mean difference (two by two table)	Standardised mean difference (two by two table)	-0.0487	NA	-0.0487	0.000287		-0.0664	0.0169411	0.000287	24851	2022-02-28				No	No	No
67	28	Jemielniak et al.	2022	COVID-19 effect on the gender gap in academic publishing	2019	12	2021	12	NA	earth sciences	TEMCP	Measured	Publications	Publications	First authorship	Worldwide	Worldwide	Sent upon request	0.24928	22914	0.24427	22643	NA	0.8	Gender guesser library, then gender guesser on a name where diacritic were converted to ASCII (using unidecode python package), then looked in a database collected from https://github.com/MatthiasWinkelmann/name-database, then using database of Chinese names https://github.com/psychbruce/ Chinese Names	NA	NA	Yes, see "Calculations" sheet	Treatment Yes= 5531, Treatment No= 17112, Control Yes= 5712, Control No=17202	Standardised mean difference (two by two table)	Standardised mean difference (two by two table)	Standardised mean difference (two by two table)	-0.0149	NA	-0.0149	0.000144		-0.0469	0.012	0.000144	45557	2022-02-28				No	No	No
68	28	Jemielniak et al.	2022	COVID-19 effect on the gender gap in academic publishing	2019	12	2021	12	NA	environment	Biological sciences	Measured	Publications	Publications	First authorship	Worldwide	Worldwide	Sent upon request	0.377101	21835	0.379512	33796	NA	0.8	Gender guesser library, then gender guesser on a name where diacritic were converted to ASCII (using unidecode python package), then looked in a database collected from https://github.com/MatthiasWinkelmann/name-database, then using database of Chinese names https://github.com/psychbruce/ Chinese Names	NA	NA	Yes, see "Calculations" sheet	Treatment Yes= 12826, Treatment No= 20970, Control Yes= 8234, Control No=13601	Standardised mean difference (two by two table)	Standardised mean difference (two by two table)	Standardised mean difference (two by two table)	0.0057	NA	0.0057	9.7e-05		-0.0387	0.00984886	9.7e-05	55631	2022-02-28				No	No	No
69	28	Jemielniak et al.	2022	COVID-19 effect on the gender gap in academic publishing	2019	12	2021	12	NA	statistics	TEMCP	Measured	Publications	Publications	First authorship	Worldwide	Worldwide	Sent upon request	0.240606	1783	0.19797	788	NA	0.8	Gender guesser library, then gender guesser on a name where diacritic were converted to ASCII (using unidecode python package), then looked in a database collected from https://github.com/MatthiasWinkelmann/name-database, then using database of Chinese names https://github.com/psychbruce/ Chinese Names	NA	NA	Yes, see "Calculations" sheet	Treatment Yes= 156, Treatment No= 632, Control Yes= 429, Control No=1354	Standardised mean difference (two by two table)	Standardised mean difference (two by two table)	Standardised mean difference (two by two table)	-0.1377	NA	-0.1377	0.003362		-0.2273	0.0579828	0.003362	2571	2022-02-28				No	No	No
70	28	Jemielniak et al.	2022	COVID-19 effect on the gender gap in academic publishing	2019	12	2021	12	NA	education	Social sciences	Measured	Publications	Publications	First authorship	Worldwide	Worldwide	Sent upon request	0.504886	8186	0.528172	13808	NA	0.8	Gender guesser library, then gender guesser on a name where diacritic were converted to ASCII (using unidecode python package), then looked in a database collected from https://github.com/MatthiasWinkelmann/name-database, then using database of Chinese names https://github.com/psychbruce/ Chinese Names	NA	NA	Yes, see "Calculations" sheet	Treatment Yes= 7293, Treatment No= 6515, Control Yes= 4133, Control No=4053	Standardised mean difference (two by two table)	Standardised mean difference (two by two table)	Standardised mean difference (two by two table)	0.0514	NA	0.0514	0.000237		0.0213-0.0816	0.0153948	0.000237	21994	2022-02-28				No	No	No
71	28	Jemielniak et al.	2022	COVID-19 effect on the gender gap in academic publishing	2019	12	2021	12	NA	biomedicine	Medicine	Measured	Publications	Publications	First authorship	Worldwide	Worldwide	Sent upon request	0.416088	74066	0.420543	28682	NA	0.8	Gender guesser library, then gender guesser on a name where diacritic were converted to ASCII (using unidecode python package), then looked in a database collected from https://github.com/MatthiasWinkelmann/name-database, then using database of Chinese names https://github.com/psychbruce/ Chinese Names	NA	NA	Yes, see "Calculations" sheet	Treatment Yes= 12062, Treatment No= 16620, Control Yes= 30818, Control No=43248	Standardised mean difference (two by two table)	Standardised mean difference (two by two table)	Standardised mean difference (two by two table)	0.0101	NA	0.0101	6e-05		-0.0304	0.00774597	6e-05	102748	2022-02-28				No	No	No
72	28	Jemielniak et al.	2022	COVID-19 effect on the gender gap in academic publishing	2019	12	2021	12	NA	engineering	TEMCP	Measured	Publications	Publications	First authorship	Worldwide	Worldwide	Sent upon request	0.191399	23788	0.197684	13643	NA	0.8	Gender guesser library, then gender guesser on a name where diacritic were converted to ASCII (using unidecode python package), then looked in a database collected from https://github.com/MatthiasWinkelmann/name-database, then using database of Chinese names https://github.com/psychbruce/ Chinese Names	NA	NA	Yes, see "Calculations" sheet	Treatment Yes= 2697, Treatment No= 10946, Control Yes= 4553, Control No=19235	Standardised mean difference (two by two table)	Standardised mean difference (two by two table)	Standardised mean difference (two by two table)	0.0221	NA	0.0221	0.000223		-0.0586	0.0149332	0.000223	37431	2022-02-28				No	No	No
73	28	Jemielniak et al.	2022	COVID-19 effect on the gender gap in academic publishing	2019	12	2021	12	NA	medicine	Medicine	Measured	Publications	Publications	First authorship	Worldwide	Worldwide	Sent upon request	0.368895	49014	0.369547	88925	NA	0.8	Gender guesser library, then gender guesser on a name where diacritic were converted to ASCII (using unidecode python package), then looked in a database collected from https://github.com/MatthiasWinkelmann/name-database, then using database of Chinese names https://github.com/psychbruce/ Chinese Names	NA	NA	Yes, see "Calculations" sheet	Treatment Yes= 18081, Treatment No= 30933, Control Yes= 32862, Control No=56063	Standardised mean difference (two by two table)	Standardised mean difference (two by two table)	Standardised mean difference (two by two table)	-0.0015	NA	-0.0015	4.1e-05		-0.0252	0.00640312	4.1e-05	137939	2022-02-28				No	No	No
74	28	Jemielniak et al.	2022	COVID-19 effect on the gender gap in academic publishing	2019	12	2021	12	NA	Social sciences	Social sciences	Measured	Publications	Publications	First authorship	Worldwide	Worldwide	Sent upon request	0.439239	7258	0.459532	2990	NA	0.8	Gender guesser library, then gender guesser on a name where diacritic were converted to ASCII (using unidecode python package), then looked in a database collected from https://github.com/MatthiasWinkelmann/name-database, then using database of Chinese names https://github.com/psychbruce/ Chinese Names	NA	NA	Yes, see "Calculations" sheet	Treatment Yes= 3188, Treatment No= 4070, Control Yes= 1374, Control No=1616	Standardised mean difference (two by two table)	Standardised mean difference (two by two table)	Standardised mean difference (two by two table)	-0.0452	NA	-0.0452	0.000579		-0.0904	0.0240624	0.000579	10248	2022-02-28				No	No	No
75	28	Jemielniak et al.	2022	COVID-19 effect on the gender gap in academic publishing	2019	12	2021	12	NA	life sciences	Multidisciplinary	Measured	Publications	Publications	First authorship	Worldwide	Worldwide	Sent upon request	0.374575	50927	0.379498	35373	NA	0.8	Gender guesser library, then gender guesser on a name where diacritic were converted to ASCII (using unidecode python package), then looked in a database collected from https://github.com/MatthiasWinkelmann/name-database, then using database of Chinese names https://github.com/psychbruce/ Chinese Names	NA	NA	Yes, see "Calculations" sheet	Treatment Yes= 13424, Treatment No= 21949, Control Yes= 19076, Control No=31851	Standardised mean difference (two by two table)	Standardised mean difference (two by two table)	Standardised mean difference (two by two table)	0.0116	NA	0.0116	6.2e-05		-0.0309	0.00787401	6.2e-05	86300	2022-02-28				No	No	No
76	28	Jemielniak et al.	2022	COVID-19 effect on the gender gap in academic publishing	2019	12	2021	12	NA	economics	Social sciences	Measured	Publications	Publications	First authorship	Worldwide	Worldwide	Sent upon request	0.266203	6326	0.241011	18800	NA	0.8	Gender guesser library, then gender guesser on a name where diacritic were converted to ASCII (using unidecode python package), then looked in a database collected from https://github.com/MatthiasWinkelmann/name-database, then using database of Chinese names https://github.com/psychbruce/ Chinese Names	NA	NA	Yes, see "Calculations" sheet	Treatment Yes= 4531, Treatment No= 14269, Control Yes= 1684, Control No=4642	Standardised mean difference (two by two table)	Standardised mean difference (two by two table)	Standardised mean difference (two by two table)	-0.0734	NA	-0.0734	0.000334		-0.0717	0.0182757	0.000334	25126	2022-02-28				No	No	No
77	28	Jemielniak et al.	2022	COVID-19 effect on the gender gap in academic publishing	2019	12	2021	12	NA	chemistry	TEMCP	Measured	Publications	Publications	First authorship	Worldwide	Worldwide	Sent upon request	0.375594	30927	0.370779	15756	NA	0.8	Gender guesser library, then gender guesser on a name where diacritic were converted to ASCII (using unidecode python package), then looked in a database collected from https://github.com/MatthiasWinkelmann/name-database, then using database of Chinese names https://github.com/psychbruce/ Chinese Names	NA	NA	Yes, see "Calculations" sheet	Treatment Yes= 5842, Treatment No= 9914, Control Yes= 11616, Control No=19311	Standardised mean difference (two by two table)	Standardised mean difference (two by two table)	Standardised mean difference (two by two table)	-0.0113	NA	-0.0113	0.000125		-0.0437	0.0111803	0.000125	46683	2022-02-28				No	No	No
78	28	Jemielniak et al.	2022	COVID-19 effect on the gender gap in academic publishing	2019	12	2021	12	NA	computer science	TEMCP	Measured	Publications	Publications	First authorship	Worldwide	Worldwide	Sent upon request	0.192969	15987	0.222327	3171	NA	0.8	Gender guesser library, then gender guesser on a name where diacritic were converted to ASCII (using unidecode python package), then looked in a database collected from https://github.com/MatthiasWinkelmann/name-database, then using database of Chinese names https://github.com/psychbruce/ Chinese Names	NA	NA	Yes, see "Calculations" sheet	Treatment Yes= 705, Treatment No= 2466, Control Yes= 3085, Control No=12902	Standardised mean difference (two by two table)	Standardised mean difference (two by two table)	Standardised mean difference (two by two table)	0.0985	NA	0.0985	0.000677		0.0475-0.1495	0.0260192	0.000677	19158	2022-02-28				No	No	No
79	28	Jemielniak et al.	2022	COVID-19 effect on the gender gap in academic publishing	2019	12	2021	12	NA	business and management	Social sciences	Measured	Publications	Publications	First authorship	Worldwide	Worldwide	Sent upon request	0.266004	6342	0.280387	6409	NA	0.8	Gender guesser library, then gender guesser on a name where diacritic were converted to ASCII (using unidecode python package), then looked in a database collected from https://github.com/MatthiasWinkelmann/name-database, then using database of Chinese names https://github.com/psychbruce/ Chinese Names	NA	NA	Yes, see "Calculations" sheet	Treatment Yes= 1797, Treatment No= 4612, Control Yes= 1687, Control No=4655	Standardised mean difference (two by two table)	Standardised mean difference (two by two table)	Standardised mean difference (two by two table)	0.0399	NA	0.0399	0.000481		-0.0859	0.0219317	0.000481	12751	2022-02-28				No	No	No
80	28	Jemielniak et al.	2022	COVID-19 effect on the gender gap in academic publishing	2019	12	2021	12	NA	physics	TEMCP	Measured	Publications	Publications	First authorship	Worldwide	Worldwide	Sent upon request	0.164845	19485	0.188803	2447	NA	0.8	Gender guesser library, then gender guesser on a name where diacritic were converted to ASCII (using unidecode python package), then looked in a database collected from https://github.com/MatthiasWinkelmann/name-database, then using database of Chinese names https://github.com/psychbruce/ Chinese Names	NA	NA	Yes, see "Calculations" sheet	Treatment Yes= 462, Treatment No= 1985, Control Yes= 3212, Control No=16273	Standardised mean difference (two by two table)	Standardised mean difference (two by two table)	Standardised mean difference (two by two table)	0.0909	NA	0.0909	0.000924		0.0313- 0.1505	0.0303974	0.000924	21932	2022-02-28				No	No	No
81	28	Jemielniak et al.	2022	COVID-19 effect on the gender gap in academic publishing	2019	12	2021	12	NA	energy	TEMCP	Measured	Publications	Publications	First authorship	Worldwide	Worldwide	Sent upon request	0.257833	1532	0.307997	3026	NA	0.8	Gender guesser library, then gender guesser on a name where diacritic were converted to ASCII (using unidecode python package), then looked in a database collected from https://github.com/MatthiasWinkelmann/name-database, then using database of Chinese names https://github.com/psychbruce/ Chinese Names	NA	NA	Yes, see "Calculations" sheet	Treatment Yes= 932, Treatment No= 2094, Control Yes= 395, Control No=1137	Standardised mean difference (two by two table)	Standardised mean difference (two by two table)	Standardised mean difference (two by two table)	0.1366	NA	0.1366	0.001508		0.0605-0.2127	0.038833	0.001508	4558	2022-02-28				No	No	No
82	28	Jemielniak et al.	2022	COVID-19 effect on the gender gap in academic publishing	2019	12	2021	12	NA	geography	Social sciences	Measured	Publications	Publications	First authorship	Worldwide	Worldwide	Sent upon request	0.258303	813	0.254082	980	NA	0.8	Gender guesser library, then gender guesser on a name where diacritic were converted to ASCII (using unidecode python package), then looked in a database collected from https://github.com/MatthiasWinkelmann/name-database, then using database of Chinese names https://github.com/psychbruce/ Chinese Names	NA	NA	Yes, see "Calculations" sheet	Treatment Yes= 249, Treatment No= 731, Control Yes= 210, Control No=603	Standardised mean difference (two by two table)	Standardised mean difference (two by two table)	Standardised mean difference (two by two table)	-0.0122	NA	-0.0122	0.003588		-0.2348	0.0598999	0.003588	1793	2022-02-28				No	No	No
83	28	Jemielniak et al.	2022	COVID-19 effect on the gender gap in academic publishing	2019	12	2021	12	NA	dentistry	Medicine	Measured	Publications	Publications	First authorship	Worldwide	Worldwide	Sent upon request	0.382147	4145	0.403737	6316	NA	0.8	Gender guesser library, then gender guesser on a name where diacritic were converted to ASCII (using unidecode python package), then looked in a database collected from https://github.com/MatthiasWinkelmann/name-database, then using database of Chinese names https://github.com/psychbruce/ Chinese Names	NA	NA	Yes, see "Calculations" sheet	Treatment Yes= 2550, Treatment No= 3766, Control Yes= 1584, Control No=2561	Standardised mean difference (two by two table)	Standardised mean difference (two by two table)	Standardised mean difference (two by two table)	0.0499	NA	0.0499	0.00051		0.0056- 0.0942	0.0225832	0.00051	10461	2022-02-28				No	No	No
84	29	Gayet-Ageron et al.	2021	Female authorship of covid-19 research in manuscripts submitted to 11 biomedical journals: cross sectional study	2018-2019	24	January 2020- May 2021 (but also breaks down phase of pandemic)	17	NA	Nine specialist and two large general medical journals	Medicine	Measured	Submissions	Submissions	First authorship	Worldwide (but has data for Africa North America Latin America Europe Oceania China Rest of Asia)	Worldwide	Table A supplementary materials	0.459599	27685	0.437083	22641	NA	0.8	Gender API, genderize and salutation (mr/m,ms/mrs/miss)	NA	NA	Yes, see "Calculations" sheet	Treatment Yes= 9896, Treatment No= 12745, Control Yes= 12724, Control No=14961	Standardised mean difference (two by two table)	Standardised mean difference (two by two table)	Standardised mean difference (two by two table)	-0.0502	NA	-0.0502	9.9e-05		-0.039	0.00994987	9.9e-05	50326	2022-02-28				No	Yes (Africa, China, Europe, Latin America, North America, Oceania, Rest of Asia and interaction with gender)	No
85	29	Gayet-Ageron et al.	2021	Female authorship of covid-19 research in manuscripts submitted to 11 biomedical journals: cross sectional study	2018-2019	24	January 2020- May 2021 (but also breaks down phase of pandemic)	17	NA	Nine specialist and two large general medical journals	Medicine	Measured	Submissions	Submissions	Last authorship	Worldwide (but has data for Africa North America Latin America Europe Oceania China Rest of Asia)	Worldwide	Table A supplementary materials	0.313991	28418	0.306757	23191	NA	0.8	Gender API, genderize and salutation (mr/m,ms/mrs/miss)	NA	NA	Yes, see "Calculations" sheet	Treatment Yes= 7114, Treatment No= 16077, Control Yes= 8923, Control No=19495	Standardised mean difference (two by two table)	Standardised mean difference (two by two table)	Standardised mean difference (two by two table)	-0.0186	NA	-0.0186	0.000111		-0.0413	0.0105357	0.000111	51609	2022-02-28				No	Yes (Africa, China, Europe, Latin America, North America, Oceania, Rest of Asia and interaction with gender)	No
86	29	Gayet-Ageron et al.	2021	Female authorship of covid-19 research in manuscripts submitted to 11 biomedical journals: cross sectional study	2018-2019	24	January 2020- May 2021 (but also breaks down phase of pandemic)	17	NA	Nine specialist and two large general medical journals	Medicine	Measured	Submissions	Submissions	Corresponding authorship	Worldwide (but has data for Africa North America Latin America Europe Oceania China Rest of Asia)	Worldwide	Table A supplementary materials	0.388804	28243	0.363227	23104	NA	0.8	Gender API, genderize and salutation (mr/m,ms/mrs/miss)	NA	NA	Yes, see "Calculations" sheet	Treatment Yes= 8392, Treatment No= 14712, Control Yes= 10981, Control No=17262	Standardised mean difference (two by two table)	Standardised mean difference (two by two table)	Standardised mean difference (two by two table)	-0.0601	NA	-0.0601	0.000102		-0.0396	0.0100995	0.000102	51347	2022-02-28				No	Yes (Africa, China, Europe, Latin America, North America, Oceania, Rest of Asia and interaction with gender)	No
87	30	Gerding et al.	2021	Scholarly Productivity in Clinical Pharmacology Amid Pandemic-Related Workforce Disruptions: Are Men and Women Affected Equally?	January 1 2018 - December 31 2019	24	January 1 - December 31 2020	12	NA	Clinical Pharmacology and Therapeutics	Medicine	Measured	Submissions	Submissions	Corresponding authorship	Worldwide (but The majority of submissions were received from North America (1,556), followed by Europe (1,144), and the Asia-Pacific (648))	North America and Europe	Figure 1	0.358063	2016.07	0.364364	1295.17	NA	NA	An exhaustive internet search, including institutional affiliations, professional organizations, publication databases, social media sites, and online biographical references.	NA	NA	Yes, see "Calculations" sheet	Treatment Yes= 472, Treatment No= 823, Control Yes= 722, Control No=1294	Standardised mean difference (two by two table)	Standardised mean difference (two by two table)	Standardised mean difference (two by two table)	0.0152	NA	0.0152	0.001669		-0.1601	0.0408534	0.001669	3340	2022-02-28				No	No	No
91	34	Biondi et al.	2021	Journal submissions, review and editorial decision patterns during initial COVID-19 restrictions	1 January 2018- 23 March 2020	26	23 March 2020- 31 July 2020	4	NA	four leading agricultural economics journals1 (Clarivate Analytics, 2020) – the American Journal of Agricultural Economics (AJAE), Applied Economic Perspectives and Policy (AEPP), Food Policy (FP), and the Journal of Agricultural Economics (JAE)	Social sciences	Measured	Submissions	Submissions	Corresponding authorship	USA 23.93%, China 10.57%, India 5.61%, Germany 4.64%, UK 4.38%, Italy 4.3%, Australia 2.53%, France 2.42%, Spain 2.42%, Canada 2.2%	Worldwide	Table 6	NA	NA	NA	NA	NA	75% for 90% of observations	Gender API	NA	NA	No, in text	Treatment Mean= 2.56, Treatment SE=1.41, Treatment Sample size=1674, Control Mean= 6.46, Control SE=1.26, Control Sample size=3692	Standardised mean difference (means and ses)	Standardised mean difference (means and ses)	Standardised mean difference (means and ses)	-0.0548	NA	-0.0548	0.000869		-0.1155	0.0294788	0.000869	5366	2022-02-28				No	No	No
94	37	Bell & Green	2020	Premature evaluation? Some cautionary thoughts on global pandemics and scholarly publishing	April-May 2019	2	April-May 2020	2	NA	Critical Public Health (CPH)	Social sciences	Measured	Submissions	Submissions	First authorship	Worldwide	Worldwide	Figure 1 and 2	0.589286	56	0.618557	97	NA	NA	Google search	NA	NA	Yes, see "Calculations" sheet	Treatment Yes=60, Treatment No= 37, Control Yes= 33, Control No=23	Standardised mean difference (two by two table)	Standardised mean difference (two by two table)	Standardised mean difference (two by two table)	0.0675	NA	0.0675	0.035708		-0.7408	0.188966	0.035708	130	2022-02-28				No	No	No
96	39	Amano-Patiño et al.	2020	The unequal effects of covid-19 on economists' research productivity	January- April 2015-2019	16	January- April 2020	4	NA	NBER Working Papers Series, the CEPR Discussion Paper Series, the newly established research repository Covid Economics: Vetted and Real Time Papers and VoxEU columns	Social sciences	Measured	Submissions	Working papers	Any authorship	Worldwide	Worldwide	Appendix Table 1	0.20803	2310	0.207041	3502	NA	70% but then manually assigned the rest	genderize.io API	NA	NA	Yes, see "Calculations" sheet	Treatment Yes=725, Treatment No= 2777, Control Yes= 481, Control No=1829	Standardised mean difference (two by two table)	Standardised mean difference (two by two table)	Standardised mean difference (two by two table)	-0.004	NA	-0.004	0.001327		-0.1428	0.036428	0.001327	5812	2022-02-28				No	No	Yes (PhD/Postdoc, Junior, midcareer, Senior, other and interaction with gender)
97	40	Wooden & Hanson	2022	Effects of the COVID-19 Pandemic on Authors and Reviewers of American Geophysical Union Journals	March 2018–February 2020	24	March 2020–February 2021	12	NA	journals published by the American Geophysical Union (AGU)	TEMCP	Measured	Submissions	Submissions	Corresponding authorship	Worldwide	Worldwide	Figure 1 a and c	0.228066	31621.9	0.222846	17314.4	NA	0.89	Self-reported and API	NA	NA	Yes, see "Calculations" sheet	Treatment Yes=3858, Treatment No= 13459, Control Yes= 7211, Control No=24410	Standardised mean difference (two by two table)	Standardised mean difference (two by two table)	Standardised mean difference (two by two table)	-0.0166	NA	-0.0166	0.000156		-0.049	0.01249	0.000156	48936	2022-02-28				No	Maybe (for china, UK/fr/germ, Europe, US, Japan, rest of asia, canada, australia, mexico/c/s america, africa but no interaction with gender)	Maybe (age and broken down into male and female, but sample sizes not given)
98	41	Rodriguez-Forti et al.	2021	Trade-off between urgency and reduced editorial capacity affect publication speed in ecological and medical journals during 2020	2018-2019	24	2020	12	NA	8 ecology journals (BMC Ecology Conservation Letters Ecology and Evolution Ecosphere Frontiers in Ecology and Evolution Landscape Ecology Nature Ecology and Evolution Perspectives in Ecology and Conservation)	Biological sciences	Measured	Publications	Publications	First authorship	Worldwide	Worldwide	Table 2 and Figure 3	0.381422	1569	0.407501	932	NA	NA	Searching publicly available data on the internet based on the name and the institution of the researcher (institution homepage, Research Gate, Google Scholar, LinkedIn, etc.) looking for pictures, pronouns and other information referring to the researcher	NA	NA	Yes, see "Calculations" sheet	Treatment Yes=379, Treatment No= 544, Control Yes= 598, Control No=966	Standardised mean difference (two by two table)	Standardised mean difference (two by two table)	Standardised mean difference (two by two table)	0.0651	NA	0.0651	0.002184		-0.1831	0.0467333	0.002184	2501	2022-02-28				No	No	No
99	41	Rodriguez-Forti et al.	2021	Trade-off between urgency and reduced editorial capacity affect publication speed in ecological and medical journals during 2020	2018-2019	24	2020	12	NA	8 ecology journals (BMC Ecology Conservation Letters Ecology and Evolution Ecosphere Frontiers in Ecology and Evolution Landscape Ecology Nature Ecology and Evolution Perspectives in Ecology and Conservation)	Biological sciences	Measured	Publications	Publications	Last authorship	Worldwide	Worldwide	Table 2 and Figure 3	0.253738	1569	0.223011	932	NA	NA	Searching publicly available data on the internet based on the name and the institution of the researcher (institution homepage, Research Gate, Google Scholar, LinkedIn, etc.) looking for pictures, pronouns and other information referring to the researcher	NA	NA	Yes, see "Calculations" sheet	Treatment Yes=207, Treatment No= 688, Control Yes= 398, Control No=1130	Standardised mean difference (two by two table)	Standardised mean difference (two by two table)	Standardised mean difference (two by two table)	-0.0869	NA	-0.0869	0.002943		-0.2127	0.0542494	0.002943	2501	2022-02-28				No	No	No
100	41	Rodriguez-Forti et al.	2021	Trade-off between urgency and reduced editorial capacity affect publication speed in ecological and medical journals during 2020	2018-2019	24	2020	12	NA	8 medicine journals (BMC Medicine BMJ Open Clinical Infectious Disease eLife - Medicine Journal of Biomedical Science Journal of Clinical Immunology Nature Medicine Plos Medicine)	Medicine	Measured	Publications	Publications	First authorship	Worldwide	Worldwide	Table 2 and Figure 3	0.4829	1898	0.447542	1147	NA	NA	Searching publicly available data on the internet based on the name and the institution of the researcher (institution homepage, Research Gate, Google Scholar, LinkedIn, etc.) looking for pictures, pronouns and other information referring to the researcher	NA	NA	Yes, see "Calculations" sheet	Treatment Yes=513, Treatment No= 629, Control Yes= 916, Control No=973	Standardised mean difference (two by two table)	Standardised mean difference (two by two table)	Standardised mean difference (two by two table)	-0.0791	NA	-0.0791	0.00172		-0.1626	0.0414729	0.00172	3045	2022-02-28				No	No	No
101	41	Rodriguez-Forti et al.	2021	Trade-off between urgency and reduced editorial capacity affect publication speed in ecological and medical journals during 2020	2018-2019	24	2020	12	NA	8 medicine journals (BMC Medicine BMJ Open Clinical Infectious Disease eLife - Medicine Journal of Biomedical Science Journal of Clinical Immunology Nature Medicine Plos Medicine)	Medicine	Measured	Publications	Publications	Last authorship	Worldwide	Worldwide	Table 2 and Figure 3	0.310875	1898	0.320831	1147	NA	NA	Searching publicly available data on the internet based on the name and the institution of the researcher (institution homepage, Research Gate, Google Scholar, LinkedIn, etc.) looking for pictures, pronouns and other information referring to the researcher	NA	NA	Yes, see "Calculations" sheet	Treatment Yes=367, Treatment No= 753, Control Yes= 590, Control No=1286	Standardised mean difference (two by two table)	Standardised mean difference (two by two table)	Standardised mean difference (two by two table)	0.0333	NA	0.0333	0.001983		-0.1746	0.0445309	0.001983	3045	2022-02-28				No	No	No
102	42	Ayyala & Trout	2021	Gender trends in authorship of Pediatric Radiology publications and impact of the COVID‑19 pandemic	2017-2019	36	2020	12	NA	Pediatric Radiology journal	Medicine	Measured	Submissions	Submissions	First authorship	North America	North America	Table 3	0.453488	172	0.445887	231	NA	NA	Gender based on name norms, through web searches and based on inference from physical appearance.	NA	NA	Yes, see "Calculations" sheet	Treatment Yes=103, Treatment No= 128, Control Yes= 78, Control No=94	Standardised mean difference (two by two table)	Standardised mean difference (two by two table)	Standardised mean difference (two by two table)	-0.0169	NA	-0.0169	0.012456		-0.4375	0.111606	0.012456	403	2022-02-28				No	No	No
103	42	Ayyala & Trout	2021	Gender trends in authorship of Pediatric Radiology publications and impact of the COVID‑19 pandemic	2017-2019	36	2020	12	NA	Pediatric Radiology journal	Medicine	Measured	Submissions	Submissions	Last authorship	North America	North America	Table 3	0.430233	172	0.337662	231	NA	NA	Gender based on name norms, through web searches and based on inference from physical appearance.	NA	NA	Yes, see "Calculations" sheet	Treatment Yes=78, Treatment No= 153, Control Yes= 74, Control No=98	Standardised mean difference (two by two table)	Standardised mean difference (two by two table)	Standardised mean difference (two by two table)	-0.2166	NA	-0.2166	0.013093		-0.4485	0.114425	0.013093	403	2022-02-28				No	No	No
104	42	Ayyala & Trout	2021	Gender trends in authorship of Pediatric Radiology publications and impact of the COVID‑19 pandemic	2017-2019	36	2020	12	NA	Pediatric Radiology journal	Medicine	Measured	Submissions	Submissions	Corresponding authorship	North America	North America	Table 3	0.395349	172	0.406926	231	NA	NA	Gender based on name norms, through web searches and based on inference from physical appearance.	NA	NA	Yes, see "Calculations" sheet	Treatment Yes=94, Treatment No= 137, Control Yes= 68, Control No=104	Standardised mean difference (two by two table)	Standardised mean difference (two by two table)	Standardised mean difference (two by two table)	0.0266	NA	0.0266	0.012845		-0.4443	0.113336	0.012845	403	2022-02-28				No	No	No
107	45	Squazzoni et al.	2021	Gender gap in journal submissions and peer review during the first wave of the COVID-19 pandemic. A study on 2329 Elsevier journals	Feb-May 2018 and Feb-May 2019	8	Feb-May 2020	4	NA	Elsevier Health & Medicine articles	Medicine	Measured	Submissions	Submissions	Any authorship	Worldwide	Worldwide	Table 3	NA	NA	NA	NA	NA	NA	Python package gender-guesser and gender API	Percentage change in numbers of submissions as predicted by mixed-effect model	-0.164	No, in text	NA	NA	NA	NA	NA	NA	-0.08	NA		NA	0.008	6.4e-05	847892	2022-02-28				No	No	Yes (age 0-20 or 20-60 since first publication, and on interaction with gender)
108	45	Squazzoni et al.	2021	Gender gap in journal submissions and peer review during the first wave of the COVID-19 pandemic. A study on 2329 Elsevier journals	Feb-May 2018 and Feb-May 2019	8	Feb-May 2020	4	NA	Elsevier Life sciences	Biological sciences	Measured	Submissions	Submissions	Any authorship	Worldwide	Worldwide	Table 3	NA	NA	NA	NA	NA	NA	Python package gender-guesser and gender API	Percentage change in numbers of submissions as predicted by mixed-effect model	-0.078	No, in text	NA	NA	NA	NA	NA	NA	-0.0003	NA		NA	0.008	6.4e-05	571051	2022-02-28				No	No	Yes (age 0-20 or 20-60 since first publication, and on interaction with gender)
109	45	Squazzoni et al.	2021	Gender gap in journal submissions and peer review during the first wave of the COVID-19 pandemic. A study on 2329 Elsevier journals	Feb-May 2018 and Feb-May 2019	8	Feb-May 2020	4	NA	Elsevier Physical Sciences & Engineering	TEMCP	Measured	Submissions	Submissions	Any authorship	Worldwide	Worldwide	Table 3	NA	NA	NA	NA	NA	NA	Python package gender-guesser and gender API	Percentage change in numbers of submissions as predicted by mixed-effect model	-0.097	No, in text	NA	NA	NA	NA	NA	NA	-0.016	NA		NA	0.008	6.4e-05	1026221	2022-02-28				No	No	Yes (age 0-20 or 20-60 since first publication, and on interaction with gender)
110	45	Squazzoni et al.	2021	Gender gap in journal submissions and peer review during the first wave of the COVID-19 pandemic. A study on 2329 Elsevier journals	Feb-May 2018 and Feb-May 2019	8	Feb-May 2020	4	NA	Elsevier Social sciences & Economics	Social sciences	Measured	Submissions	Submissions	Any authorship	Worldwide	Worldwide	Table 3	NA	NA	NA	NA	NA	NA	Python package gender-guesser and gender API	Percentage change in numbers of submissions as predicted by mixed-effect model	-0.077	No, in text	NA	NA	NA	NA	NA	NA	-0.028	NA		NA	0.012	0.000144	195157	2022-02-28				No	No	Yes (age 0-20 or 20-60 since first publication, and on interaction with gender)
111	46	Harris et al.	2022	Exploratory Investigation of Gender Differences in School Psychology Publishing Before and During the Initial Phase of COVID-19	March-May 2017, 2018, 2019	9	March-May 2020	3	NA	three school psychology journals: Canadian Journal of School Psychology (CJSP), Journal of School Psychology (JSP), and School Psychology (SP; formerly School Psychology Quarterly).	Social sciences	Measured	Submissions	Submissions	First authorship	North America	North America	Table 3	0.580952	525	0.617143	175	NA	NA	Pérez (2016) Gender Guesser software package	NA	NA	No, in text	Treatment Yes=108, Treatment No= 67, Control Yes= 305, Control No=220	Standardised mean difference (two by two table)	Standardised mean difference (two by two table)	Standardised mean difference (two by two table)	0.0831	NA	0.0831	0.00973		-0.3866	0.0986408	0.00973	700	2022-02-28				No	No	No
112	47	Chen &Seto	2021	Gender and authorship patterns in urban land science	Jan 2019- Various depending on region	NA	Various depending on region- December 2020	NA	NA	Urban land science	Social sciences	Measured	Publications	Publications	First authorship	Worldwide	Worldwide	Table 1 and Appendix	0.266667	210	0.382353	170	NA	0.9	Gender API controlling for region and manually searching low accuracy names	NA	NA	Yes, see "Calculations" sheet	Treatment Yes=65, Treatment No= 56, Control Yes= 105, Control No=154	Standardised mean difference (two by two table)	Standardised mean difference (two by two table)	Standardised mean difference (two by two table)	0.2933	NA	0.2933	0.014973		0.0535-0.5332	0.122364	0.014973	380	2022-02-28				No	Yes (continents asia, north america, europe, oceania, africa, south america and interaction with gender)	No
116	51	Inno et al.	2020	COVID-19 lockdown effects on gender equality	January- June 2019	6	January- June 2020	6	NA	arXiv	TEMCP	Measured	Submissions	Submissions	Any authorship	Italy	Europe	Figure 1	0.317	224	0.266	218	NA	NA	Using INAF and MIUR websites	NA	NA	No, in text	Treatment Yes= 58, Treatment No= 160, Control Yes= 71, Control No=153	Standardised mean difference (two by two table)	Standardised mean difference (two by two table)	Standardised mean difference (two by two table)	-0.1362	NA	-0.1362	0.013408		0.4539	0.115791	0.013408	442	2021-07-27				No	No	No
117	52	Jordan & Carlezon	2021	Effects of the COVID-19 pandemic on gender representation among corresponding authors of Neuropsychopharmacology (NPP) manuscripts: submissions during January–June, 2020	January- June 2019	6	January- June 2020	6	NA	Neuropsychopharmacology	Medicine	Measured	Submissions	Submissions	Corresponding authorship	Worldwide	Worldwide	Figure 1	0.392	608	0.385	749	NA	NA	On-line searches for the use of gender-specific pronouns on websites and/or photographs to match an individual’s indicated (first) name to their gender	NA	NA	No, in text	Treatment Yes= 288, Treatment No= 461, Control Yes= 238, Control No=369	Standardised mean difference (two by two table)	Standardised mean difference (two by two table)	Standardised mean difference (two by two table)	-0.0176	NA	-0.0176	0.003816		0.2422	0.0617857	0.003816	1357	2021-07-27				No	No	No
118	53	Kibbe	2020	Consequences of the COVID-19 Pandemic Consequences of the COVID-19 Pandemic on Manuscript Submissions byWomen	April-May 2019	2	April-May 2020	2	NA	JAMA surgery	Medicine	Measured	Submissions	Submissions	First authorship	Worldwide	Worldwide	Table 1	0.325137	366	0.293276	699	NA	NA	Gender API	NA	NA	No, in text	Treatment Yes= 205, Treatment No= 494, Control Yes= 119, Control No=247	Standardised mean difference (two by two table)	Standardised mean difference (two by two table)	Standardised mean difference (two by two table)	-0.0823	NA	-0.0823	0.005883		0.3006	0.0766837	0.005883	1065	2021-07-27				No	No	No
119	53	Kibbe	2020	Consequences of the COVID-19 Pandemic Consequences of the COVID-19 Pandemic on Manuscript Submissions byWomen	April-May 2019	2	April-May 2020	2	NA	JAMA surgery	Medicine	Measured	Submissions	Submissions	Last authorship	Worldwide	Worldwide	Table 1	0.268493	365	0.211731	699	NA	NA	Gender API	NA	NA	No, in text	Treatment Yes= 148, Treatment No= 551, Control Yes= 98, Control No=267	Standardised mean difference (two by two table)	Standardised mean difference (two by two table)	Standardised mean difference (two by two table)	-0.1721	NA	-0.1721	0.006846		0.3443	0.0878316	0.006846	1064	2021-07-27				No	No	No
120	53	Kibbe	2020	Consequences of the COVID-19 Pandemic Consequences of the COVID-19 Pandemic on Manuscript Submissions byWomen	April-May 2019	2	April-May 2020	2	NA	JAMA surgery	Medicine	Measured	Submissions	Submissions	Corresponding authorship	Worldwide	Worldwide	Table 1	0.287671	365	0.223496	698	NA	NA	Gender API	NA	NA	No, in text	Treatment Yes= 156, Treatment No= 542, Control Yes= 105, Control No=260	Standardised mean difference (two by two table)	Standardised mean difference (two by two table)	Standardised mean difference (two by two table)	-0.1867	NA	-0.1867	0.006573		0.3178	0.0810714	0.006573	1063	2021-07-27				No	No	No
121	54	Mogensen et al.	2021	The Impact of the COVID-19 Pandemic on Journal Scholarly Activity Among Female Contributors	April-October 2019	7	April-October 2020	7	NA	Journal of the American College of Radiology	Medicine	Measured	Submissions	Submissions	Corresponding authorship	United States	North America	Table 1	0.450161	311	0.390023	441	NA	NA	Interpretation from first name and using internet searches	NA	NA	No, in text	Treatment Yes= 172, Treatment No= 269, Control Yes= 140, Control No=171	Standardised mean difference (two by two table)	Standardised mean difference (two by two table)	Standardised mean difference (two by two table)	-0.1363	NA	-0.1363	0.006846		0.3244	0.0827551	0.006846	752	2021-07-27				No	No	No
122	55	Vincent-Lammare et al.	2021	The decline of women's research production during the coronavirus pandemic	March-April 2019	2	March - April 2020	2	NA	EarthArXiv	TEMCP	Measured	Submissions	Submissions	First authorship	Worldwide	Worldwide	Figure 3	0.2561	82	0.1333	90	NA	NA	Gender disambiguation algorithm	NA	NA	No, in text	Treatment Yes= 12, Treatment No= 78, Control Yes= 21, Control No=61	Standardised mean difference (two by two table)	Standardised mean difference (two by two table)	Standardised mean difference (two by two table)	-0.4441	NA	-0.4441	0.048685		0.8649	0.220638	0.048685	172	2021-07-27				No	No	No
123	55	Vincent-Lammare et al.	2021	The decline of women's research production during the coronavirus pandemic	March-April 2019	2	March - April 2020	2	NA	F1000Research	Multidisciplinary	Measured	Submissions	Submissions	First authorship	Worldwide	Worldwide	Figure 3	0.2612	725	0.26	2306	NA	NA	Gender disambiguation algorithm	NA	NA	No, in text	Treatment Yes=600 , Treatment No= 1706, Control Yes= 189, Control No=536	Standardised mean difference (two by two table)	Standardised mean difference (two by two table)	Standardised mean difference (two by two table)	-0.0014	NA	-0.0014	0.00286		0.2096	0.0534694	0.00286	3031	2021-07-27				No	No	No
124	55	Vincent-Lammare et al.	2021	The decline of women's research production during the coronavirus pandemic	March-April 2019	2	March - April 2020	2	NA	NBER	Social sciences	Measured	Submissions	Submissions	First authorship	Worldwide	Worldwide	Figure 3	0.1824	178	0.1513	334	NA	NA	Gender disambiguation algorithm	NA	NA	No, in text	Treatment Yes= 51, Treatment No= 283, Control Yes= 32, Control No=146	Standardised mean difference (two by two table)	Standardised mean difference (two by two table)	Standardised mean difference (two by two table)	-0.1079	NA	-0.1079	0.018615		0.5348	0.136429	0.018615	512	2021-07-27				No	No	No
125	55	Vincent-Lammare et al.	2021	The decline of women's research production during the coronavirus pandemic	March-April 2019	2	March - April 2020	2	NA	Preprints.org	Multidisciplinary	Measured	Submissions	Submissions	First authorship	Worldwide	Worldwide	Figure 3	0.22691	148	0.2207	238	NA	NA	Gender disambiguation algorithm	NA	NA	No, in text	Treatment Yes= 53, Treatment No= 185, Control Yes= 34, Control No=114	Standardised mean difference (two by two table)	Standardised mean difference (two by two table)	Standardised mean difference (two by two table)	-0.0222	NA	-0.0222	0.018985		0.5401	0.137781	0.018985	386	2021-07-27				No	No	No
126	55	Vincent-Lammare et al.	2021	The decline of women's research production during the coronavirus pandemic	March-April 2019	2	March - April 2020	2	NA	PsyArxiv	TEMCP	Measured	Submissions	Submissions	First authorship	Worldwide	Worldwide	Figure 3	0.3193	454	0.3222	811	NA	NA	Gender disambiguation algorithm	NA	NA	No, in text	Treatment Yes= 261, Treatment No= 550, Control Yes= 145, Control No=30	Standardised mean difference (two by two table)	Standardised mean difference (two by two table)	Standardised mean difference (two by two table)	0.0062	NA	0.0062	0.004797		0.2715	0.0692602	0.004797	1265	2021-07-27				No	No	No
127	55	Vincent-Lammare et al.	2021	The decline of women's research production during the coronavirus pandemic	March-April 2019	2	March - April 2020	2	NA	SocArXiv	Social sciences	Measured	Submissions	Submissions	First authorship	Worldwide	Worldwide	Figure 3	0.3146	134	0.2275	100	NA	NA	Gender disambiguation algorithm	NA	NA	No, in text	Treatment Yes= 23, Treatment No= 77, Control Yes= 42, Control No=92	Standardised mean difference (two by two table)	Standardised mean difference (two by two table)	Standardised mean difference (two by two table)	-0.2339	NA	-0.2339	0.027705		0.6525	0.166454	0.027705	234	2021-07-27				No	No	No
128	55	Vincent-Lammare et al.	2021	The decline of women's research production during the coronavirus pandemic	March-April 2019	2	March - April 2020	2	NA	arXiv	TEMCP	Measured	Submissions	Submissions	First authorship	Worldwide	Worldwide	Figure 3	0.1458	19655	0.1474	22085	NA	NA	Gender disambiguation algorithm	NA	NA	No, in text	Treatment Yes= 3255, Treatment No= 18830, Control Yes= 2866, Control No=16789	Standardised mean difference (two by two table)	Standardised mean difference (two by two table)	Standardised mean difference (two by two table)	0.0069	NA	0.0069	0.000234		0.0599	0.0152806	0.000234	41740	2021-07-27				No	No	No
129	55	Vincent-Lammare et al.	2021	The decline of women's research production during the coronavirus pandemic	March-April 2019	2	March - April 2020	2	NA	bioRxiv	Biological sciences	Measured	Submissions	Submissions	First authorship	Worldwide	Worldwide	Figure 3	0.3043	451	0.3112	869	NA	NA	Gender disambiguation algorithm	NA	NA	No, in text	Treatment Yes= 270, Treatment No= 599, Control Yes= 137, Control No=314	Standardised mean difference (two by two table)	Standardised mean difference (two by two table)	Standardised mean difference (two by two table)	0.018	NA	0.018	0.00482		0.2721	0.0694133	0.00482	1320	2021-07-27				No	No	No
130	55	Vincent-Lammare et al.	2021	The decline of women's research production during the coronavirus pandemic	March-April 2019	2	March - April 2020	2	NA	medRxiv	Medicine	Measured	Submissions	Submissions	First authorship	Worldwide	Worldwide	Figure 3	0.3421	3736	0.2222	7024	NA	NA	Gender disambiguation algorithm	NA	NA	No, in text	Treatment Yes= 1561, Treatment No= 5463, Control Yes= 1278, Control No=2458	Standardised mean difference (two by two table)	Standardised mean difference (two by two table)	Standardised mean difference (two by two table)	-0.33	NA	-0.33	0.000612		0.0969	0.0247194	0.000612	10760	2021-07-27				No	No	No
7	5	Krukowski et al.	2021	Academic Productivity Differences by Gender and Child Age in Science, Technology, Engineering, Mathematics, and Medicine Faculty During the COVID-19 Pandemic	mid-Jan to Mid-March 2020	2	Mid March to mid-May 2020	2	2020-05-15	STEM	TEMCP	Self-reported	Submissions	Submissions (self-reported)	First authorship	US	North America	Table 3					NA	NA	Self-reported	NA	NA	Yes, see "Calculations" sheet	Treatment Yes= 96, Treatment No= 79.2, Control Yes= 115.2, Control No=70.4	Standardised mean difference (two by two table)	Standardised mean difference (two by two table)	Standardised mean difference (two by two table)	-0.1655	NA	-0.1655	0.01396	0.01396	-0.4631	0.118152	0.01396	280	2021-07-27	A.C.	I have used all the metrics provided: for first, last or mid authroship. Plus, they reprot the submission rate with SD, not the percantage of authors - so basically this ES needs to be calulcated in a different way. We need to include new column to this table for it. Also, they reprot on grants subbmitted, but think this is not what we have decided to use?	See "Calculations" sheet for method.	Maybe (effect of no children, 0-5 year olds, 6-11 year olds, 12-17 year olds living at home)	No	No
8	5	Krukowski et al.	2021	Academic Productivity Differences by Gender and Child Age in Science, Technology, Engineering, Mathematics, and Medicine Faculty During the COVID-19 Pandemic	mid-Jan to Mid-March 2020	2	Mid March to mid-May 2020	2	2020-05-15	STEM	TEMCP	Self-reported	Submissions	Submissions (self-reported)	Last authorship	US	North America	Table 3					NA	NA	Self-reported	NA	NA	Yes, see "Calculations" sheet	Treatment Yes= 76.8, Treatment No= 70.4, Control Yes= 96, Control No=61.6	Standardised mean difference (two by two table)	Standardised mean difference (two by two table)	Standardised mean difference (two by two table)	-0.1966	NA	-0.1966	0.016376	0.016376	-0.5017	0.127969	0.016376	280	2021-07-27	A.C.		See "Calculations" sheet for method.	Maybe (effect of no children, 0-5 year olds, 6-11 year olds, 12-17 year olds living at home)	No	No
9	5	Krukowski et al.	2021	Academic Productivity Differences by Gender and Child Age in Science, Technology, Engineering, Mathematics, and Medicine Faculty During the COVID-19 Pandemic	mid-Jan to Mid-March 2020	2	Mid March to mid-May 2020	2	2020-05-15	STEM	TEMCP	Self-reported	Submissions	Submissions (self-reported)	Middle authorship	US	North America	Table 3					NA	NA	Self-reported	NA	NA	Yes, see "Calculations" sheet	Treatment Yes= 115.2, Treatment No= 79.2, Control Yes= 172.8, Control No=88	Standardised mean difference (two by two table)	Standardised mean difference (two by two table)	Standardised mean difference (two by two table)	-0.1655	NA	-0.1655	0.01169	0.01169	-0.4239	0.10812	0.01169	280	2021-07-27	A.C.		See "Calculations" sheet for method.	Maybe (effect of no children, 0-5 year olds, 6-11 year olds, 12-17 year olds living at home)	No	No
20	7	Camerlink et al.	2021	Impacts of the COVID-19 pandemic on animal behaviour and welfare researchers⋆	NA	NA	NA	NA	NA	Animal behaviour and welfare	Biological sciences	Self-reported	Other	Research time	Work-productivity during pandemics: working hours, percentage of time spent on research and education	Worldwide (28 countries, ~60% from Europe)	Europe	Text page 4	NA	NA	NA	NA	0.825	NA	Self-reported	NA	NA	No, in text	Treatment group sample size (n) = 94 Control group sample size (n) = 20 F-test (2-group, one-way) = 13.81	Standardised mean difference (f-test, unequal sample size)	Standardised mean difference (F-tes, unequal sample size)	Standardised mean difference (F-tes, unequal sample size)	0.8879	0.9151	0.9151	0.0641	0.0643	0.4181 - 1.4121	0.253574	0.0643	114	2021-07-27	A.C.	has also data on the influence of the care-role. differences in red	I believe they have incorrectly put total sample size as 117, when it should be 114 (82.5% of respondants were women, which is 94/114 not 94/117), so it should be 94 women and 20 men when calculating effect size. Either that or 3 people did not report a gender. Regardless, in my analysis I exclude this dataset because of skewed data from 20 men of n=114 total respondants.	Maybe (parent vs non-parents on research productivity and on amount of care by women and men during lockdown only)	No	Maybe (PhD student, early career researcher, established, senior but not on interaction with gender)
21	8	Rodriguez-Rivero et al.	2020	Is It Time for a Revolution in Work‒Life Balance? Reflections from Spain		NA		NA	NA	STEM (though it seems from table 4 that they work in different roles, including support stuff)	TEMCP	Self-reported	Other	General productivity	Self reproted adverse effect of pandemics on work perfomance	Spain (University Politecnica de Madrid)	Europe	Table 8	NA	NA	NA	NA	0.64	NA	Self-reported	NA	NA	No, in text	Mean/Treatment 3.49 SD/Treatment 1.984 N/Treatment 235 Mean/Control 3.51 SD/Control 2.070 N/Control 418	Standardised mean difference (means and sds)	Standardised mean difference (means and standard deviation)	Standardised mean difference (means and standard deviation)	-0.0098	-0.0098	-0.0098	0.0066		-0.3196	0.0812404	0.0066	653	2021-07-27	A.C.	here we need to use reported mean and SD - changes to the table. for the sample size and % of women I have used the data from the table 8 for 'My work preformance has been adversely affected by the lockdown'	Agreed	Maybe (changes in care for women and men during lockdown)	No	No
22	9	Myers et al.	2020	Unequal effects of the COVID-19 pandemic on scientists	NA	NA	13-20 April 2020	NA	2020-04-20	Multidisciplinary	Multidisciplinary	Self-reported	Other	Research time	Research hours per week	US and Europe	North America and Europe	Figure 2c, Text page 881	NA	NA	NA	NA		NA	Self-reported	Percentage change in research time as predicted by lasso regression coefficient	-0.053	Yes, see "Calculations" sheet	NA	NA	NA	NA	NA	NA	-0.053	NA	NA	-0.0563	0.0287245	0.000825096	4535	2021-07-27	A.C.		I extracted effect sizes from measuring figure 2c, see "Calculations" sheet	Yes (has 0-5 year old dependent and interaction with gender)	No	Yes (interaction of age in decades with being female)
23	10	Staniscuaski et al.	2020	Gender, race and parenthood impact academic productivity during the COVID-19 pandemic: from survey to action.	NA	NA	NA	NA	NA	not specified	Multidisciplinary	Self-reported	Submissions	Submissions (self-reported)	Ability to submit papers	Brazil	Iberico- America	text, from bottom p4	NA	NA	NA	NA	0.684	NA	Self-reported	NA	NA	No, in text	Chi-square value= 88.42, Sample size=3345	Standardised mean difference (chi-square)	Standardised mean difference (chi-square)	Standardised mean difference (chi-square)	-0.3296	-0.3296	-0.3296	0.0012	0.0012	0.1373	0.034641	0.0012	3345	2021-07-27	A.M.	Manuscript submission among male academics was less affected by the pandemic circumstances than that among women (Figure 1A), with a significant difference between men and women (χ2 = 88.42, P < 0.0001).	NA	Yes (has child and interaction with gender)	No	No
35	12	Breuning et al.	2021	The Great Equalizer? Gender, Parenting, and Scholarly Productivity During the Global Pandemic	NA	NA	6-30 May 2020	NA	2020-05-30	Political sciences and international studies	Social sciences	Self-reported	Other	Research time	self-reported loss in productivity (unability to write/research at home compared to pre-pandemic level)	USA (60%) + rest of the world	North America	table 1, statement1					0.653	NA	Self-reported	NA	NA	Yes, see "Calculations" sheet	Treatment Yes=230, Treatment No=95,Control Yes=441, Control No= 181	Standardised mean difference (two by two frequency table)	Standardised mean difference (two by two frequency table)	Standardised mean difference (two by two frequency table)	-0.0035	-0.0035	-0.0035	0.0047	0.00689	-0.3254	0.083006	0.00689	852	2021-07-27	A.M.	table 1, top: perceived changes in productivity during pandemic as compared to pre-pandemic (men versus women: χ2 = 0.0104, P < 0.995).	See "Calculations" sheet for values used.	Yes (parent vs non-parents on research productivity and interaction with gender)	No	No
50	19	Barber et al.	2021	What Explains Differences in Finance Research Productivity during the Pandemic?		NA	26 October 2020 - 04 November 2020 (survey)	NA	2020-11-04	Finance association	Social sciences	Self-reported	Other	General productivity	Self-reported productivity change on likert scale	Worldwide	Worldwide	Figure 3	NA	NA	NA	1008	0.332	NA	Self-reported	NA	NA	Yes, see "Calculations" sheet	Treatment Mean= 0.3505460218, Treatment SD= 0.2068772949, Treatment N= 335, Control Mean= 0.3974063963, Control SD= 0.1858026861, Control N= 673	Standardised mean difference (means and sds)	Standardised mean difference (from Mean & Standard deviation) (male 1.96 sd 1.129; female 1.75 sd 1.043)	Standardised mean difference (from Mean & Standard deviation) (male 1.96 sd 1.129; female 1.75 sd 1.043)	-0.1902	-0.2427	-0.2427	0.0033	0.0045	-0.2258	0.067082	0.0045	1008	2021-07-27	D.L.	Based on frequency of responses in Figure 3 (male 0.44 times 1, 0.34 times 2, etc)	I understand this now. Thanks, though based on my calculations, I have effect size -0.2342, variance 0.0045, using values highlighted in green in "Calculations". The differences are small and likely arise from taking physical measurements from the figures slightly differently, so should not be an issue. I feel like the measuring tool in adobe is good and will stick with mine.	Yes (child/ no child and interaction with gender)	No	Yes (Student, Junior Faculty, Senior faculty and interaction with gender)
51	20	Ghaffarizadeh et al.	2021	Life and work of researchers trapped in the COVID-19 pandemic vicious cycle		NA	01 December 2020 - 10 December 2020 (survey)	NA	2020-12-10		Multidisciplinary	Self-reported	Other	General productivity	Binary whether loss of research productivity	USA + Europe	North America and Europe	Results Page 4	NA	NA	NA	740	0.39	NA	Self-reported	NA	NA	Yes, see "Calculations" sheet	Treatment Yes= 76, Treatment No= 217, Control Yes= 170, Control No=265	Standardised mean difference (two by two table)	Standardised mean difference (two by two table) (men 176 vs 112; women 323 vs 114)	Standardised mean difference (two by two table) (men 176 vs 112; women 323 vs 114)	-0.325	-0.3337	-0.3337	0.008048	0.008335	-0.3865	0.0912962	0.008335	725	2021-07-27	D.L.	Based on proportion of men/women figure 1 and percentages in results	I understand this now. Thanks, though based on my calculations, I have effect size -0.3311, variance 0.008342, using values highlighted in green in "Calculations". The differences are small and likely arise from taking physical measurements from the figures slightly differently, so should not be an issue. I feel like the measuring tool in adobe is good and will stick with mine.	No	No	Maybe (Graduate students, Postdoctoral scholars, Faculties and research staff, but no interaction with gender studied, supplementary materials)
52	21	Shalaby et al.	2021	Leveling the Field: Gender Inequity in Academia during COVID-19		NA	25 July 2020 - 28 July 2020 (survey)	NA	2020-07-28	Political sciences	Social sciences	Self-reported	Submissions	Submissions (self-reported)	Self reported ability to submit/complete work	Worldwide (online survey with 77.98% respondants from North America)	North America	Figure 1b	NA	NA	NA	170	0.55	NA	Self-reported	NA	NA	No, in text	Treatment Yes= 22, Treatment No= 71, Control Yes= 23, Control No=54	Standardised mean difference (two by two table)	Standardised mean difference (two by two table) (men 59 vs 18; women 65 vs 28)	Standardised mean difference (two by two table) (men 59 vs 18; women 65 vs 28)	-0.1902	-0.1754	-0.1754	0.037571	0.036942	-0.7598	0.192203	0.036942	170	2021-07-27	D.L.	Based on proportion decreased productivity Figure 1b	I understand this now. Thanks, though based on my calculations, I have effect size -0.1754, variance 0.036942, using values highlighted in green in "Calculations". I think this is because you accidentally flipped the percentages for men and women around.	Yes (children/no children and interaction with gender)	No	Yes (but no interaction with gender studied, and no raw data, supplementary materials)
60	26	Davis et al.	2022	Are we failing female and racialized academics? A Canadian national survey examining the impacts of the COVID-19 pandemic on tenure and tenuretrack faculty	NA	NA	May/June 2020	NA	2020-06-30	Not specified	Multidisciplinary	Self-reported	Other	General productivity	Whether the pandemic created low productivity (Y/N)	Canada	North America	Table 3	NA	NA	NA	NA	0.52	NA	Self-reported	NA	NA	Yes, see "Calculations" sheet	Treatment Yes= 128, Treatment No= 186, Control Yes= 203, Control No=159	Standardised mean difference (two by two table)	Standardised mean difference (two by two table)	Standardised mean difference (two by two table)	-0.3407	NA	-0.3407	0.007418		-0.3376	0.0861278	0.007418	549	2022-02-28			I use "low productivity" in table 3	No	No	No
88	31	Diaz et al.	2021	Burnout syndrome in pediatric urology: A perspective during the COVID-19 pandemic d Ibero-American survey		NA	Weeks 28-32 2020	NA	2020-08-09	members of the two major associations of pediatric urology in Ibero-America (the Ibero- American Society of Pediatric Urology [SIUP] and the Brazilian School of Pediatric Urology [BSPU])	Medicine	Self-reported	Other	Burn-out	Work-related burnout	Ibero-America (14 countries. Brazil 45.7%, Argentina 11.4%, Chile 10.9%, Mexico 9.7%, Colombia 8.6%, and others 13.7%)	Iberico- America	Figure 3b	NA	NA	NA	NA	0.246	NA	Self-reported	NA	NA	Yes, see "Calculations" sheet	Treatment Yes= 17, Treatment No= 28, Control Yes= 114, Control No=18	Standardised mean difference (two by two table)	Standardised mean difference (two by two table)	Standardised mean difference (two by two table)	-1.2928	NA	-1.2928	0.048289		-0.8614	0.219748	0.048289	177	2022-02-28				No	No	No
89	32	Stenson et al.	2022	Impact of COVID-19 on access to laboratories and human participants: exercise science faculty perspectives	NA	NA	January 2021 (about Fall 2020)	NA	2021-01-31	exercise science faculty	Medicine	Self-reported	Other	General productivity	Research productivity	United States	North America	Sent upon request	NA	NA	NA	NA	0.52	NA	Self-reported	NA	NA	Yes, see "Calculations" sheet	Treatment Yes= 22, Treatment No= 30, Control Yes= 17, Control No=31	Standardised mean difference (two by two table)	Standardised mean difference (two by two table)	Standardised mean difference (two by two table)	0.1602	NA	0.1602	0.051634		-0.8907	0.227231	0.051634	100	2022-02-28				No	No	No
90	33	Plaunova et al.	2021	Faculty - An Exacerbation of Gender Differences in Unpaid Home Duties and Professional Productivity	NA	NA	October 27 and November 24, 2020	NA	2020-11-24	Association of University Radiologists	Medicine	Self-reported	Other	General productivity	Work productivity from home	USA	North America	Text page 3	NA	NA	NA	NA	0.469	NA	Self-reported	NA	NA	Yes, see "Calculations" sheet	Treatment Mean= 2.77, Treatment SD=1.27, Treatment Sample size=45, Control Mean= 3.42, Control SD=1.05, Control Sample size=51	Standardised mean difference (means and sds)	Standardised mean difference (means and sds)	Standardised mean difference (means and sds)	-0.5612	NA	-0.5612	0.0435		-0.8173	0.208567	0.0435	96	2022-02-28				No	No	No
92	35	Deryugena et al.	2021	COVID-19 Disruptions disproportionately affect female academics	NA	NA	May 27, 2020 to July 21, 2020	NA	2020-07-21	Not specified	Multidisciplinary	Self-reported	Other	Research time	Hours of research per day	Worldwide	Worldwide	Table B5	NA	NA	NA	NA	0.402	NA	Self-reported	NA	NA	No, in text	Treatment N= 8004, Control N=11901, p-value t-test=0.000099	Standardised mean difference (t-test p-value unequal sample sizes)	Standardised mean difference (t-test p-value unequal sample sizes)	Standardised mean difference (t-test p-value unequal sample sizes)	-0.0563	NA	-0.0563	0.000209		0.0567	0.0144568	0.000209	19905	2022-02-28				Yes (effect of number of children- 0,1,2 or 3+ and interaction with gender on hours of research per day)	No (has effect of ethinicity on research, but not ethnicity interaction with gender)	Maybe (only effect of age, not interaction with gender)
93	36	Candido et al.	2021	AS CIÊNCIAS SOCIAIS NA PANDEMIA DE COVID-19: ROTINAS DE TRABALHO E DESIGUALDADES (Social sciences IN THE COVID-19 PANDEMIC: WORK ROUTINES AND INEQUALITIES)	NA	NA	June 10- July 15 2020.	NA	2020-07-15	Anthropology, Political Science, Sociology and International Relations	Social sciences	Self-reported	Other	General productivity	Pandemic effect on academic productivity	Brazil	Iberico- America	Figure 2	NA	NA	NA	NA	0.496	NA	Self-reported	NA	NA	Yes, see "Calculations" sheet	Treatment Mean= 0.3969849246, Treatment SD=0.4545864296, Treatment Sample size=199, Control Mean= 0.4108910891, Control SD=0.4157384361, Control Sample size=202	Standardised mean difference (means and sds)	Standardised mean difference (means and sds)	Standardised mean difference (means and sds)	-0.0319	NA	-0.0319	0.01		-0.3915	0.1	0.01	1073	2022-02-28				No	No (has effect of white/ non-white on research, but not ethnicity interaction with gender)	No
95	38	Guintivano et al.	2021	Psychiatric genomics research during the COVID-19 pandemic: A survey of Psychiatric Genomics Consortium researchers	NA	NA	April 20, 2020 and June 19, 2020	NA	2020-06-19	Psychiatric Genomics Consortium (PGC)	Medicine	Self-reported	Other	General productivity	Disruption from having to work from home	Worldwide (United States (n = 49, 41.9%), followed by United Kingdom, n = 10; Germany, n = 7; Sweden, n = 7; Australia, n = 4; Denmark, n = 4; Canada, n = 3; Brazil, n < 3; Greece, n < 3; Italy, n < 3; Mexico, n < 3; Netherlands, n < 3; Spain, n < 3; Switzerland, n < 3; Afghanistan, n < 3; Austria, n < 3; Estonia, n < 3; Japan, n < 3; New Zealand, n < 3; Norway, n < 3; Romania, n < 3; South Afric…	North America and Europe	Table 3	NA	NA	NA	NA	0.579	NA	Self-reported	NA	NA	Yes, see "Calculations" sheet	Treatment Mean= 3.145, Treatment SD=3.071, Treatment Sample size=48, Control Mean= 4.465, Control SD=3.552, Control Sample size=66	Standardised mean difference (means and sds)	Standardised mean difference (means and sds)	Standardised mean difference (means and sds)	-0.393	NA	-0.393	0.0367		-0.7506	0.191572	0.0367	114	2022-02-28				No	No	Maybe (tenure/non-tenure/trainee effect, but no interaction with gender)
105	43	Ellinas et al.	2022	Winners and Losers in Academic Productivity During the COVID-19 Pandemic: Is the Gender Gap Widening for Faculty?	NA	NA	August and September of 2020	NA	2020-09-30	faculty from a private Midwest academic medical center	Medicine	Self-reported	Other	General productivity	Academic productivity	North America	North America	Table 2	NA	NA	NA	NA	0.623	NA	Self-reported	NA	NA	No, in text	Treatment Yes=50, Treatment No= 137, Control Yes= 35, Control No=68	Standardised mean difference (two by two table)	Standardised mean difference (two by two table)	Standardised mean difference (two by two table)	-0.1895	NA	-0.1895	0.021453		-0.5741	0.146468	0.021453	290	2022-02-28				Maybe (<11 child, but not on interaction with gender)	No	Maybe (professor/other, but not on interaction with gender)
106	44	Maguire et al.	2021	Research interrupted: The impact of the COVID-19 pandemic on multiple sclerosis research in the field of rehabilitation and quality of life	NA	NA	January-February 2021	NA	2021-02-28	rehabilitation and quality of life (QoL) research in multiple sclerosis (MS)	Medicine	Self-reported	Other	General productivity	Research productivity decrease following COVID-19 relative to other gender	18 different countries, including the USA (n=24), Italy (n=16), Canada (n=10), Austria (n=9), France (n=4), the UK (n=3), Turkey (n=3), Ireland (n=3), Belgium (n=3), Norway (n=2), Switzerland (n=1), Spain (n=1), Slovenia (n=1), Israel (n=1), Germany (n=1), Finland (n=1), the Czech Republic (n=1), and Australia (n=1).	North America and Europe	Text page 5	NA	NA	NA	NA	0.759	NA	Self-reported	NA	NA	No, in text	Treatment Mean= 2.32, Treatment SD=0.95, Treatment Sample size=29, Control Mean= 3.11, Control SD=1.13, Control Sample size=58	Standardised mean difference (means and sds)	Standardised mean difference (means and sds)	Standardised mean difference (means and sds)	-0.7355	NA	-0.7355	0.0548		-0.9179	0.234094	0.0548	87	2022-02-28				No	No	No
113	48	Gao et al.	2021	Potentially long-lasting effects of the pandemic on scientists	NA	NA	April 2020 - January 2021	NA	2021-01-31	Multidisciplinary	Multidisciplinary	Self-reported	Other	Projects	Number of new research projects	US and Europe	North America and Europe	Supplementary Figure 7	NA	NA	NA	NA	NA	NA	Self-reported	Percentage change in research time as predicted by lasso regression coefficient	-0.20468	No, in text	NA	NA	NA	NA	NA	NA	-0.20468	NA		NA	0.15507	0.0240468	6982	2022-02-28		AC		Maybe (effect of child and child age, but not on interaction with gender)	No	Maybe (tenured or not and age, but not on interaction with gender)
114	49	Hoggarth et al.	2021	Impacts of the COVID-19 Pandemic on Women and Early Career Archaeologists	NA	NA	March 2020 to June 2021	NA	2020-06-30	archaeology	Social sciences	Self-reported	Other	Job loss	Academic job loss	majority of respondents live in the United States (86% n = 491), with smaller numbers of respondents from Canada (5%, n = 27), the UK (4%, n = 22), and the European Union (3%, n = 16)	North America	Supplementary Table 1	NA	NA	NA	NA	0.57	NA	Self-reported	NA	NA	No, in text	Treatment Yes=17, Treatment No= 209, Control Yes= 56, Control No=273	Standardised mean difference (two by two table)	Standardised mean difference (two by two table)	Standardised mean difference (two by two table)	-0.51	NA	-0.51	0.025876		-0.6306	0.16086	0.025876	555	2022-02-28				No	No	Yes (age group 18-34, 35-54, 55+ and on interaction with gender)
115	50	Yildirim & Elsen-Ziya	2021	The differential impact of COVID-19 on the work conditions of women and men academics during the lockdown	NA	NA	10 and 20 June 2020	NA	2020-06-20	Multidisciplinary	Multidisciplinary	Self-reported	Other	General productivity	Effect of COVID-19 pandemic on work from home	90 per cent of our sample consist of academics working in France, Germany, Italy, Norway, Sweden, Turkey, UK and the United States	North America and Europe	Table 2	NA	NA	NA	NA	0.65	NA	Self-reported	Percentage change in ability to work from home during pandemic as predicted by ordered logistic regression	-0.515	No, in text	NA	NA	NA	NA	NA	NA	-0.515	NA		NA	0.308	0.094864	180	2022-02-28				Maybe (effect of child, but not on interaction with gender)	No	Maybe (tenured or not and age, but not on interaction with gender)

## Sheet: Variables
Variable	Details
ID	Unique ID for each effect size numbered 1 to 130
Article ID	Unique ID for each article numbered 1 to 55
Author	Author(s) of study
Title	Title of study
Dates pre-pandemic	Date range given by the study for which was the pre-pandemic data were collected (interval day/month/year)
Timeframe pre-pandemic	Length of the pre-pandemic data collection period calculated as end date minus the start date of date range considered as pre-pandemic for article-output studies (months)
Dates during pandemic	Date range given by the study for which was the during-pandemic data were collected (interval day/month/year)
Timeframe during-pandemic	Length of the during-pandemic data collection period calculated as end date minus the start date of date range considered as pandemic for article-output studies (months)
End date of survey	End date respondents could submit answers for survey studies
Months into the pandemic	The number of month between the beginning of the pandemic in January 2020 and the final end date of data collection in the study
Narrow research field	Research field to the most specific scale as defined by the study authors (free-form text field)
Broad research field	Categorical variable classifying research field standardised to broader levels of one of: "Medicine", "Technology, Engineering, Mathematics, Chemistry and Physics (TEMCP)", "Social sciences", "Biological sciences", or "Multidisciplinary". Multidisciplinary studies were classed as those which did not focus on any one field.
Self reported or measured	Categorical variable classifying whether studies assessed productivity either as "self-reported", where individuals report their gender and their productivity, or as "measured", where gender is inferred and productivity determined by assessing numbers of submissions and articles in article-output studies
Broad productivity measure	Categorical variable classifying the measure of productivity as one of: "Submissions", "Publications", or "Other". Other includes those not studying either numbers of submissions or publications.
Broad specific productivity	Categorical variable classifying the specific measure of productivity as one of: "Submissions", "Pre-prints", "Publications", "Working papers", "Research time", "General productivity", "Burn-out", "Projects", or "Job loss"
Specific productivity measure	Measure of productivity to the most specific level as stated by authors of the study (free-form text field)
Region	Geographic region at the most specific scale as stated by the authors, including percentage breakdowns of sub-regions, if stated
Broad region	Categorical variable classifying region grouped into one of: "Worldwide", "Western", or "Global South". Worldwide studies include those sampling multiple sub-regions, but with no majority sub-region, or if no region was specified. Western studies were classed as and those with the majority of sub-regions from any combination of North America, Europe and Australasia. Global South studies were clas…
Data availability	Where in the study the data could be found from Tables, Figues, Supplementary Tables or Figure, or if in the text, the page number is specificed.
% women authors pre-pandemic	For article-output studies, the percentage of women authors before the pandemic, as defined by the time-period sampled in the respective study
N pre-pandemic	For article-output studies, the total number of authors sampled before the pandemic, as defined by the time-period sampled in the respective study
% women authors during pandemic	For article-output studies, the percentage of women authors during the pandemic, as defined by the time-period sampled in the respective study
N during pandemic	For article-output studies, the total number of authors sampled during the pandemic, as defined by the time-period sampled in the respective study
% women survey respondants	For survey studies, the percentage of those respondants identifying as a woman.
Gender accuracy	The minimum percentage accuracy threshold used in the gender assignment tool for studies which use one and which report the figure
Gender inference	The method of gender inference used by the study
Effect size type used by study authors	The regression method from which our effect size was calculated for those studies where we could not calculate the effect size directly from the raw data
Effect size value given by study author	The value of the reported regression result for studies where we could not calculate the effect size directly from the raw data
Additional calculations necessary?	A classifier indicating whether additional calculations were necessary to obtain raw numbers, such as conversions of percentages or the use of Adobe Acrobat's measure tool to obtain values from figures
Raw values used in calculation of effect size	The raw values entered in the Campbell collaboration calculator for the effect sizes calculated from the original data
Effect size type primary reviewer	Outcome effect size type in the Campbell collaboration calculator chosen by primary coder
Effect size type second reviewer	Outcome effect size type in the Campbell collaboration calculator chosen by secondary coder
Effect size type used in MA	Effect size type used in meta-analysis as listed from Campbell collaboration calculator, after agreement between primary and secondary coder
Effect size value primary reviewer	Value of the effect size as calculated by primary coder using Campbell collaboration calculator
Effect size value secondary reviewer	Value of the effect size as calculated by secondary coder using Campbell collaboration calculator
Effect size used in MA	Value of the effect size used in the meta-analysis, either the value calculated from the raw data or if raw data were not available calculated from the regression statistic
Variance primary reviewer	Value of the variance in the effect size calculated by primary coder using Campbell collaboration calculator
Variance seconday reviewer	Value of the variance in the effect size calculated by secondary coder using Campbell collaboration calculator
Variance as 95% confidence interval	Value of variance as 95% confidence intervals, as calculated from raw data or as listed in the publication for effect sizes where raw data were not available
Variance as standard error	Value of variance as standard error, as calculated from raw data or as listed in the publication for effect sizes where raw data were not available
Variance used in MA	Value of the variance used in meta-analysis (for cases with raw data available calculated from Campbell collaboration calculator, and for cases where only standard error available calculated as square of standard error, and for cases where only 95% confidence intervals available calculated by dividing the 95% confidence interval by 1.96 and then squaring)
Sample size	Sample size, as either total number of submissions and publications sampled, or number of survey respondants
Date of search	Date when search was carried out in databases
Second reviewer	Initials of second coder who extracted effect sizes
Notes second reviewer	Any notes by second coder
Notes after review	Any notes by primary coder after reviewing extracted variables by secondary coder
Data available for parent effect?	Classifier indicating whether or not data available were available for separate effect sizes to be calculated on interaction effect of parent status
Data available for geographic breakdown?	Classifier indicating whether or not data available were available for separate effect sizes to be calculated on interaction effect of geographic region
Data available for career stage/age?	Classifier indicating whether or not data available were available for separate effect sizes to be calculated on interaction effect of career stage/age

## Sheet: Scoping search
PICO question:
Population:	across academic journals
Intervention:	has pandemic working conditions
Comparison:	compared with pre-pandemic working conditions
Outcome:	exacerbated the gender gap in number of publications/ number of submitted publications/ number of self-reported publications
Study	Authors	Title	Academic arena	Pre-pandemic and post pandemic?	Link	Journal article?	Indexed in Web of Science?	Indexed in Scopus?
1	Tina S Ipe, Ruchika Goel, Lydia Howes, Sara Bakhtary	The impact of COVID-19 on academic productivity by female physicians and researchers in transfusion medicine	1024 articles in four transfusion medicine journals	Y	https://pubmed.ncbi.nlm.nih.gov/33527397/	Y	Y	Y
2	Lerchenmüller, C., Schmallenbach, L., Jena, A.B., Lerchenmueller, M.J.	Longitudinal analyses of gender differences in first authorship publications related to COVID-19	42 898 publications on COVID-19 in 2020 and 483 232 publications appearing in the same journals in 2019	Y	https://bmjopen.bmj.com/content/11/4/e045176	Y	Y	Y
3	Muric, G., Lerman, K., Ferrara, E.	Gender disparity in the authorship of biomedical research publications during the COVID-19 pandemic: Retrospective observational study	78,950 papers from the bioRxiv and medRxiv repositories and from 62 selected Springer-Nature journals by 346,354 unique authors	Y	https://www-ncbi-nlm-nih-gov.proxy-ub.rug.nl/pmc/articles/PMC8043146/	Y	Y	Y
4	Williams, W.A., Li, A., Goodman, D.M., Ross, L.F.	Impact of the Coronavirus Disease 2019 Pandemic on Authorship Gender in The Journal of Pediatrics: Disproportionate Productivity by International Male Researchers	1521 original articles in The Journal of Pediatrics	Y	https://pubmed.ncbi.nlm.nih.gov/33347956/	Y	Y	Y
5	Nguyen, A.X., Trinh, X.-V., Kurian, J., Wu, A.Y.	Impact of COVID-19 on longitudinal ophthalmology authorship gender trends	528 ophthalmology-related articles written by 2518 authors in COVID-19 databases	Y	https://www.ncbi.nlm.nih.gov/pmc/articles/PMC7857347/	Y	Y	Y
6	King, M.M., Frederickson, M.E.	The Pandemic Penalty: The Gendered Effects of COVID-19 on Scientific Productivity	450,000 authorships in the arXiv and bioRxiv scholarly preprint	Y	https://journals.sagepub.com/doi/full/10.1177/23780231211006977	Y	N	Y
7	Ribarovska, A.K., Hutchinson, M.R., Pittman, Q.J., Pariante, C., Spencer, S.J.	Gender inequality in publishing during the COVID-19 pandemic	Brain Behav Immun journal (don't say number of articles)	Y	https://www.ncbi.nlm.nih.gov/pmc/articles/PMC7670232/	Y	Y	Y
8	Defilippis, E.M., Sinnenberg, L., Mahmud, N., (...), Michos, E.D., Reza, N.	Gender Differences in Publication Authorship During COVID-19: A Bibliometric Analysis of High-Impact Cardiology Journals	4 high-impact cardiology journals (Journal of the American College of Cardiology, Circulation, JAMA Cardiology, and European Heart Journal)	Y	https://www-ahajournals-org.proxy-ub.rug.nl/doi/pdf/10.1161/JAHA.120.019005	Y	Y	Y
9	Andersen, J.P., Nielsen, M.W., Simone, N.L., Lewiss, R.E., Jagsi, R.	COVID-19 medical papers have fewer women first authors than expected	Medical papers	Y	https://elifesciences.org/articles/58807	Y	Y	Y
10	Bell, Michelle L., Fong, Kelvin C.	Gender Differences in First and Corresponding Authorship in Public Health Research Submissions During the COVID-19 Pandemic	American Journal of Public Health manuscripts submitted	Y	https://ajph-aphapublications-org.proxy-ub.rug.nl/doi/pdf/10.2105%2FAJPH.2020.305975	Y	Y	Y
11	Cushman, M.	Gender gap in women authors is not worse during COVID-19 pandemic: Results from Research and Practice in Thrombosis and Haemostasis	Research and Practice in Thrombosis and Haemostasis (RPTH)	Y	https://onlinelibrary-wiley-com.proxy-ub.rug.nl/doi/pdfdirect/10.1002/rth2.12399	Y	N	Y
12	Krukowski, R.A., Jagsi, R., Cardel, M.I.	Academic Productivity Differences by Gender and Child Age in Science, Technology, Engineering, Mathematics, and Medicine Faculty During the COVID-19 Pandemic	STEMM faculty in the United States	Y	https://www-liebertpub-com.proxy-ub.rug.nl/doi/pdf/10.1089/jwh.2020.8710	Y	Y	Y
13	Jordan, C.J., & Carlezon Jr, W.A.	Effects of the COVID-19 pandemic on gender representation among corresponding authors of Neuropsychopharmacology (NPP) manuscripts: submissions during January–June, 2020	Journal of Neuropsychopharmacology (NPP) manuscripts	Y	https://www.nature.com/articles/s41386-020-00869-4	Y	Y	Y
14	Wehner, Mackenzie R., Li, Y., Nead, K.T.	Comparison of the Proportions of Female and Male Corresponding Authors in Preprint Research Repositories Before and During the COVID-19 Pandemic	web-scraped metadata from medRxiv	Y	https://jamanetwork.com/journals/jamanetworkopen/fullarticle/2770728?utm_source=For_The_Media&utm_medium=referral&utm_campaign=ftm_links&utm_term=091720	N	Y	Y
15	Mogensen MA, Lee CI, Carlos RC	The Impact of the COVID-19 Pandemic on Journal Scholarly Activity Among Female Contributors	Journal of the American College of Radiology	Y	doi:10.1016/j.jacr.2021.01.011	Y	N	Y
16	Kibbe, M.R.	Consequences of the COVID-19 Pandemic on Manuscript Submissions by Women	JAMA Surgery	Y	https://jamanetwork.com/journals/jamasurgery/fullarticle/2769186	N	Y	Y
17	Cook, J. & Gupta, M.	Gender differences in authorship of obstetrics and gynecology publications during the coronavirus disease 2019 pandemic	Human Reproduction Update, American Journal of Obstetrics and Gynecology, Fertility and Sterility, Human Reproduction, Obstetrics and Gynecology, and Gynecologic Oncology	Y	https://www.ncbi.nlm.nih.gov/pmc/articles/PMC7574786/	Y	Y	N
18	Squazzoni F, Bravo G, Grimaldo F, et al	Only second-class tickets for women in the COVID-19 race. A study on manuscript submissions and reviews in 2329 Elsevier journals	2329 Elsevier journals	Y	https://poseidon01.ssrn.com/delivery.php?ID=125017092064003019110007025086112112041074054049036036007019125101098120006072109124124027025103026004058022096077011008115091104038028011067080069019094074064103123088041042081028082003083009024082118001070031086104124091127086121008112076075122091112&EXT=pdf&INDEX=TRUE	N?	N	N
19	Noriko Amano-Patiño, Elisa Faraglia, Chryssi Giannitsarou, Zeina Hasna	The Unequal Effects of Covid-19 on Economists’ Research Productivity	National Bureau of Economic Research (NBER) Working Papers Series and the Centre of Economic Policy Research (CEPR) Discussion Paper Series	Y	https://www.repository.cam.ac.uk/bitstream/handle/1810/310888/cwpe2038.pdf?sequence=1&isAllowed=y	N	N	N
20	Philippe Vincent-Lamarre, Cassidy R. Sugimoto, Vincent Larivière	The decline of women's research production during the coronavirus pandemic	11 pre-print repositories	Y	https://www.natureindex.com/news-blog/decline-women-scientist-research-publishing-production-coronavirus-pandemic	N	N	N
21	Inno, L., Rotundi, A., Piccialli, A.	COVID-19 lockdown effects on gender inequality	Italian astronomy and astrophysics researchers publishing in arXiv	Y	https://www.nature.com/articles/s41550-020-01258-z	N	N	N

## Sheet: Calculations
Bell and Fong
			N authors					N authors
			Pre-Pandemic Period					Pandemic Period
			Gender predicted with >95% accuracy		Gender predicted with 50-94% accuracy		Unknown	Gender predicted with >95% accuracy		Gender predicted with 50-94% accuracy		Unknown
		Continent	Male	Female	Male	Female		Male	Female	Male	Female
		Africa	2	3	1	0	1	3	1	1	1	0
		Asia	17	17	11	6	4	72	32	95	45	17
		Australia/Oceania	8	4	0	0	2	4	6	3	3	0
		Europe	13	11	3	1	0	45	19	4	6	0
		North America	181	220	25	46	8	313	343	52	79	8
		South America	5	12	1	0	0	4	6	0	2	1
			226	267				441	407				1341
Krukowski et. al		N papers per 2 months	First authors				Last authors				Coauthors
			Pre-pandemic		Pandemic		Pre-pandemic		Pandemic		Pre-pandemic		Pandemic			N individuals
			Mean rate of articles per 2 months	SD rate of articles per 2 months	Mean rate of articles per 2 months	SD rate of articles per 2 months	Mean rate of articles per 2 months	SD rate of articles per 2 months	Mean rate of articles per 2 months	SD rate of articles per 2 months	Mean rate of articles per 2 months	SD rate of articles per 2 months	Mean rate of articles per 2 months	SD rate of articles per 2 months
		Men	0.8	1.1	0.9	1.3	0.7	1	0.8	1.2	1	1.1	0.9	1.4		88
		Women	0.6	0.8	0.5	0.8	0.5	0.9	0.4	0.8	0.9	1.2	0.6	0.9		192
		N papers per 2 months * N individuals	First authors				Last authors				Coauthors
			Pre-pandemic		Pandemic		Pre-pandemic		Pandemic		Pre-pandemic		Pandemic
			Mean rate of articles per 2 months	SD rate of articles per 2 months	Mean rate of articles per 2 months	SD rate of articles per 2 months	Mean rate of articles per 2 months	SD rate of articles per 2 months	Mean rate of articles per 2 months	SD rate of articles per 2 months	Mean rate of articles per 2 months	SD rate of articles per 2 months	Mean rate of articles per 2 months	SD rate of articles per 2 months
		Men	70.4	96.8	79.2	114.4	61.6	88	70.4	105.6	88	96.8	79.2	123.2
		Women	115.2	153.6	96	153.6	96	172.8	76.8	153.6	172.8	230.4	115.2	172.8
King and Frederickson			N women pre-pandemic	N men pre-pandemic	N total pre-pandemic	N women pandemic	N men pandemic	N total pandemic	Sample size		N women pre-pandemic	N men pre-pandemic	N total pre-pandemic	N women pandemic	N men pandemic	N total pandemic	Sample size
			7000	25750	32750	7189	27398	34587	67337		7000	25750	32750	7189	27398	34587	67337
			189.189	1166.67	1355.86	196.189	1278.67	1474.86	2830.71		189.189	1166.67	1355.86	196.189	1278.67	1474.86	2830.71
			1479.59	5586.96	7066.55	1721.09	6004.46	7725.55	14792.1		1479.59	5586.96	7066.55	1721.09	6004.46	7725.55	14792.1
			4142.86	13166.7	17309.5	4171.86	13561.7	17733.5	35043		4142.86	13166.7	17309.5	4171.86	13561.7	17733.5	35043
			1333.33	5915.09	7248.43	1341.33	6542.09	7883.43	15131.9		1333.33	5915.09	7248.43	1341.33	6542.09	7883.43	15131.9
			7000	11139	18139	9512.59	15464.4	24977	43116		7000	11139	18139	9512.59	15464.4	24977	43116
			16.9972	61.9946	78.9918	22.9972	84.9946	107.992	186.984		16.9972	61.9946	78.9918	22.9972	84.9946	107.992	186.984
			954.178	1500	2454.18	1308.18	1791	3099.18	5553.36		954.178	1500	2454.18	1308.18	1791	3099.18	5553.36
			5210.02	7881.8	13091.8	7393.02	11215.8	18608.8	31700.6		5210.02	7881.8	13091.8	7393.02	11215.8	18608.8	31700.6
			677.419	1843.97	2521.39	803.419	2363.97	3167.39	5688.78		677.419	1843.97	2521.39	803.419	2363.97	3167.39	5688.78
Myers et. al			Scale	Distance mm
			0.3	18.1
			Percentage reduction female	Distance female mm
			0.0530387	3.2
			Percentage reduction female	Upper 95% CI distance mm
			0.0812155	4.9
			Percentage reduction female	Lower 95% CI distance mm
			0.0248619	1.5
																					0.174	4
Muric et. al		All publishers		Proportion women before	SE women before	Proportion women during	SE women during			N before	N after	Total N									0	1
			First	0.389	0.007	0.353	0.004			19706.1	658.846	20364.9									0.826	25
			Last	0.257	0.005	0.236	0.003														23	30
			Any	0.354	0.003	0.348	0.002
			Solo	0.21	0.03	0.137	0.008
		bioRxiv	First	0.367	0.008	0.37	0.004			13156.7	495.626	13652.3
			Last	0.235	0.007	0.233	0.004
			Any	0.342	0.003	0.344	0.002
			Solo	0.209	0.035	0.165	0.016
		medXriv	First	0.335	0.055	0.3	0.009			2165.89	198.779	2364.67
			Last	0.309	0.038	0.23	0.005
			Any	0.376	0.016	0.348	0.005
			Solo	–	–	0.145	0.025
		Springer-Nature	First	0.458	0.011	0.438	0.014			4770.88	195.95	4966.83
			Last	0.315	0.008	0.275	0.011
			Any	0.39	0.006	0.382	0.007
			Solo	0.284	0.04	0.299	0.029
Breuning et. al			Has pandemic affected research?	M	F	Total						M	F
			Disgree	0.212	0.212	181		61.904	118.72
			Neither agree or disagree	0.113	0.111	95		32.996	62.16		N that Disagree/ No effect of pandemic	94.9	180.88
			Agree	0.675	0.677	576		197.1	379.12		N that Agree there is affect of pandemic	230.096	441.28
			N	292	560	852		292	560
		Pre-pandemic		Pandemic				Pre-pandemic		Pandemic
	Articles per week worldwide	Mean	SD	Mean	SD	N	Articles per week US	Mean	SD	Mean	SD	N
		779.1	177.5	1015.8	140.4			378.8	88	511.4	86
	Female	231	57	268.2	42.9		Female	103.4	36.2	119.3	21.4	3877	400882
	Male	548.1	124.4	747.6	104.3		Male	275.4	55.4	392.1	68.6	11617
	n Articles worldwide						n Articles per week US
	Female	3234		2682			Female	1447.6		1193
	Male	7673.4		7476			Male	3855.6		3921
Andersen et. al													Pre-covid				Covid
		Journal specialty	N	First author	Full group	Last author	N	First author	Full group	Last author			First author	Full group	Last author		First author	Full group	Last author
		Dermatology	1811	0.44	0.42	0.37	72	0.46	0.41	0.31			796.84	760.62	670.07		33.12	29.52	22.32
		Emergency medicine	1283	0.32	0.3	0.22	54	0.31	0.25	0.13			410.56	384.9	282.26		16.74	13.5	7.02
		High impact general medicine	7142	0.41	0.42	0.39	194	0.31	0.37	0.35			2928.22	2999.64	2785.38		60.14	71.78	67.9
		Infectious diseases	1404	0.45	0.42	0.34	44	0.2	0.32	0.34			631.8	589.68	477.36		8.8	14.08	14.96
		Internal medicine	19980	0.36	0.33	0.25	484	0.33	0.32	0.24			7192.8	6593.4	4995		159.72	154.88	116.16
		Other basic sciences	6975	0.42	0.38	0.29	135	0.33	0.34	0.28			2929.5	2650.5	2022.75		44.55	45.9	37.8
		Other clinical sciences	21869	0.4	0.37	0.31	429	0.38	0.38	0.35			8747.6	8091.53	6779.39		163.02	163.02	150.15
		Otolaryngology	1063	0.32	0.29	0.21	106	0.28	0.29	0.24			340.16	308.27	223.23		29.68	30.74	25.44
		Pathology	869	0.46	0.43	0.32	66	0.27	0.37	0.3			399.74	373.67	278.08		17.82	24.42	19.8
		Public health	11015	0.47	0.41	0.35	99	0.33	0.41	0.37			5177.05	4516.15	3855.25		32.67	40.59	36.63
		Radiology	2262	0.37	0.33	0.27	60	0.25	0.28	0.17			836.94	746.46	610.74		15	16.8	10.2
		Surgery	9700	0.21	0.2	0.13	186	0.26	0.22	0.16			2037	1940	1261		48.36	40.92	29.76
			85373				1929						32428.2	29954.8	24240.5		629.62	646.15	538.14
													0.379842	0.35087	0.283936		0.326397	0.334966	0.278974
			Length Much Less (mm)	Length Less (mm)	Length About the Same (mm)	Length More (mm)	Length Much More (mm)		Proportion Much Less (mm)	Proportion Less (mm)	Proportion About the Same (mm)	Proportion More (mm)	Proportion Much More (mm)	Sum (check it adds to 1)		Scale Length (mm)	Scale proportion
Barber et. al		Male	148.6	117	26.7	34.4	15.8		0.434672	0.342239	0.0781006	0.100624	0.0462168	1.00185		256.4	0.75						Barber et. al
		Female	184.2	102.6	20	24.2	10.6		0.538807	0.300117	0.0585023	0.0707878	0.0310062	0.99922
									Proportion*1	Proportion*2	Proportion*3	Proportion*4	Proportion*5	Mean	SD	N
									0.434672	0.684477	0.234302	0.402496	0.231084	0.397406	0.185803	673.344
									0.538807	0.600234	0.175507	0.283151	0.155031	0.350546	0.206877	334.656
	Dieter's calculations	I extracted these values from Figure 3: I converted the labels on the x-axis according to the Likert scale (as listed in the text) from 'much less' =1 to 'much more' =5, and multiplied it by their y-values to get the mean and sd.
Ghaffarazideh et. al			Length (mm)	Proportion	N	Proportion productivity reduction	N productivity reduction	N no production reduction
		Total	253.6	1	740
		Male	149	0.587539	434.779	0.61	265.215	169.564
		Female	100.3	0.395505	292.674	0.74	216.578	76.0951
	Dieter's calculations	There are 740 individuals in total. Based on Figure 1 I estimated that 39% are men (288 individuals) and 59% are women (437 individuals). I then took the percentages in the text to assume that this reflects the proportion of men (61%) and women (74%) who had experienced a reduction to arrive at the two by two table									total men (39% of 740)	288		total women (59% of 740)	437
											men experiencing lower productivity (61% of 288)	176		women experiencing lower productivity (74% of 437)	323
											men not experiencing lower productivity (remaining 39% of 288)	112		women not experiencing lower productivity (remaining 26% of 437)	114
Shalaby et. al			Proportion decreased	Proportion stay same	Proportion increased	N	N decreased	N stay same	N increased	N no decrease
		Total
		Male	0.701	0.221	0.078	77	53.977	17.017	6.006	23.023
		Female	0.761	0.185	0.054	93	70.773	17.205	5.022	22.227
	Dieter's calculations	There are 170 individuals in total, of which 54.7% identified as female (93), remaining as male (77). Of the men, 76.1% report a decrease in publications, 70.1% of women.									total men (45.3% of 170)	77		total women (54.7% of 170)	93
											men experiencing lower productivity (76.1% of 77)	59		women experiencing lower productivity (70.1% of 437)	65
											men not experiencing lower productivity (remaining 23.9% of 288)	18		women not experiencing lower productivity (remaining 29.9% of 437)	28
Ribravsoka et. al		First authors	Proportion authors pre-covid	N authors pre-covid	Proportion authors covid	N authors covid		Last authors	Proportion pre-covid	N pre-covid	Proportion covid	N covid?		Scale 109mm=0.8	July length during COVID (mm)	August length during COVID (mm)	October length during COVID (mm)	November length during COVID (mm)	January length during COVID (mm)		July proportion	August proportion	October proportion	November proportion	January proportion
		Male	0.38	100.7	0.5	132.5		Male	0.58	153.7	0.670018	177.555			34.6	48.1	54	42.1	46		0.253945	0.353028	0.39633	0.308991	0.337615
		Female	0.62	164.3	0.5	132.5		Female	0.42	111.3	0.329982	87.4451
		Total		265		265		Total		265		265
	Dieter's calculations	To get at the absolute numbers for the proportions in Figure 1, I assumed that each month had the average number of articles published (From the legend "Each month contained between 40 and 136 articles" = so average is 88 articles).
Cushman et. al		First authors	Proportion pre-covid	N pre-covid	Proportion covid	N covid		Last authors	Proportion pre-covid	N pre-covid	Proportion covid	N covid
		Male	0.667	10.005	0.649	48.026		Male	0.6	9	0.622	46.028
		Female	0.333	4.995	0.351	25.974		Female	0.4	6	0.378	27.972
		Total		15		74		Total		15		74
Ipe et. al		First authors	Proportion pre-covid	N pre-covid	Proportion covid	N covid		Last authors	Proportion pre-covid	N pre-covid	Proportion covid	N covid												Ghaffaridzadeh et. al
		Male	0.509	257	0.573	181		Male	0.646	331	0.645	318
		Female	0.491	248	0.427			Female	0.354	181	0.355	175
		Total						Total
Davis				Yes		No
		Females	362	0.56	202.72	0.44	159.28
		Males	314	0.407	127.798	0.593	186.202
Anabaraonye et. al		First authors	Pre-covid			COVID
			Total	N female	N male	Total	N female	N male	P
		Non-senior	254	98 (38.6)	156 (61.4)	26	5 (19.2)	21 (80.8)	0.051
		Senior	160	46 (28.8)	114 (71.3)	38	14 (36.8)	24 (63.2)	0.329
		Scientiﬁc articles
		Non-senior	232	85 (36.6)	147 (63.4)	19	2 (10.5)	17 (89.5)	0.021
		Senior	152	45 (29.6)	107 (70.4)	25	11 (44.0)	14 (56.0)	0.152
		Non-Scientiﬁc articles
		Non-Senior	22	13 (29.1)	9 (40.9)	7	3 (42.9)	4 (57.1)	0.667
		Senior	8	1 (12.5)	7 (87.5)	13	3 (23.1)	10 (76.9)	1
			828	288	540	128	38	90
		Corresponding authors	Pre-covid			COVID
			Total	N female	N male	Total	N female	N male	P
		Non-senior	244	62 (25.4)	182 (74.6)	28	9 (32.1)	19 (67.9)	0.442
		Senior	147	38 (25.9)	109 (74.1)	36	9 (25.0)	27 (75.0)	0.917
		Scientiﬁc articles
		Non-senior	222	55 (24.8)	167 (75.2)	21	6 (27.3)	15 (71.4)	0.701
		Senior	139	37 (26.6)	102 (73.4)	21	6 (27.3)	15 (71.4)	0.851
		Non-science articles
		Non-senior	22	7 (31.8)	15 (68.2)	7	3 (42.9)	4 (57.4)	0.665
		Senior	8	1 (12.5)	7 (87.5)	15	3 (20.0)	12 (80.0)	1
			782	200	582	128	36	92		1866
Jemielniak et. al		field	year	Gender	No Authors			Women	Men		psychology	Sample size
		psychology	2019	female	9181
				male	8003
			2020	male	13938
				female	3217		Pre-pandemic	8003	9181	17184
			2021	male	2096
				female	430		Pandemic	3647	16034	19681	mathematics	36865
		mathematics	2019	male	23865
				female	5300
			2020	male	273
				female	69		Pre-pandemic	5300	23865	29165
			2021	male	1584
				female	314		Pandemic	383	1857	2240	philosophy	31405
		philosophy	2019	male	3919
				female	1747
			2020	male	710
				female	206		Pre-pandemic	1747	3919	5666
			2021	male	550
				female	237		Pandemic	443	1260	1703	materials sciences	7369
		materials sciences	2019	male	12023
				female	4365
			2020	male	3704
				female	1198		Pre-pandemic	4365	12023	16388
			2021	male	2648
				female	913		Pandemic	2111	6352	8463	earth sciences	24851
		earth sciences	2019	male	17202
				female	5712
			2020	male	13559
				female	4467		Pre-pandemic	5712	17202	22914
			2021	male	3553
				female	1064		Pandemic	5531	17112	22643	environment	45557
		environment	2019	male	13601
				female	8234
			2020	male	16934
				female	10471		Pre-pandemic	8234	13601	21835
			2021	male	4036
				female	2355		Pandemic	12826	20970	33796	statistics	55631
		statistics	2019	male	1321
				female	416
			2020	male	33
				female	13		Pre-pandemic	429	1354	1783
			2021	male	599
				female	143		Pandemic	156	632	788	education	2571
		education	2019	female	4133
				male	4053
			2020	female	6402
				male	5660		Pre-pandemic	4133	4053	8186
			2021	female	891
				male	855		Pandemic	7293	6515	13808	biomedicine	21994
		biomedicine	2019	male	43248
				female	30818
			2020	male	14032
				female	10170		Pre-pandemic	30818	43248	74066
			2021	male	2588
				female	1892		Pandemic	12062	16620	28682	engineering	102748
		engineering	2019	male	19235
				female	4553
			2020	male	5192
				female	1289		Pre-pandemic	4553	19235	23788
			2021	male	5754
				female	1408		Pandemic	2697	10946	13643	medicine	37431
		medicine	2019	male	30933
				female	18081
			2020	male	23591
				female	13649		Pre-pandemic	18081	30933	49014
			2021	male	32472
				female	19213		Pandemic	32862	56063	88925	Social sciences	137939
		Social sciences	2019	male	4070
				female	3188
			2020	male	985
				female	820		Pre-pandemic	3188	4070	7258
			2021	male	631
				female	554		Pandemic	1374	1616	2990	life sciences	10248
		life sciences	2019	male	31851
				female	19076
			2020	male	14513
				female	8861		Pre-pandemic	19076	31851	50927
			2021	male	7436
				female	4563		Pandemic	13424	21949	35373	economics	86300
		economics	2019	male	4642
				female	1684
			2020	male	13542
				female	4311		Pre-pandemic	1684	4642	6326
			2021	male	727
				female	220		Pandemic	4531	14269	18800	chemistry	25126
		chemistry	2019	male	19311
				female	11616
			2020	male	5491
				female	3226		Pre-pandemic	11616	19311	30927
			2021	male	4423
				female	2616		Pandemic	5842	9914	15756	computer science	46683
		computer science	2019	male	12902
				female	3085
			2020	male	883
				female	280		Pre-pandemic	3085	12902	15987
			2021	male	1583
				female	425		Pandemic	705	2466	3171	business and management	19158
		business and management	2019	male	4655
				female	1687
			2020	male	3741
				female	1434		Pre-pandemic	1687	4655	6342
			2021	male	871
				female	363		Pandemic	1797	4612	6409	physics	12751
		physics	2019	male	16273
				female	3212		Pre-pandemic	3212	16273	19485
			2021	male	1985
				female	462		Pandemic	462	1985	2447	energy	21932
		energy	2019	male	1137
				female	395		Pre-pandemic	395	1137	1532
			2020	male	1754
				female	790
			2021	male	340
				female	142		Pandemic	932	2094	3026	geography	4558
		geography	2019	male	603
				female	210		Pre-pandemic	210	603	813
			2020	male	641
				female	219
			2021	male	90
				female	30		Pandemic	249	731	980	dentistry	1793
		dentistry	2019	male	2561
				female	1584		Pre-pandemic	1584	2561	4145
			2020	male	3062
				female	2023
			2021	male	704
				female	527		Pandemic	2550	3766	6316		10461
Gayet-Ageron et. al			Pre-pandemic	Pandemic (non-covid related)	Pandemic (covid related)	Pandemic total			Pre-pandemic	Pandemic (non-covid related)	Pandemic (covid related)	Pandemic total		Total pre-pandemic	Total pandemic	Total
		First author gender, (n missing, %)						First author gender, (n missing, %)
		Female	12724	8583	1313	9896		Male	14961	10523	2222	12745		27685	22641	50326
		Last author gender, (n missing, %)						Last author gender, (n missing, %)						0	0
		Female	8923	6118	996	7114		Male	19495	13499	2578	16077		28418	23191	51609
		Corresponding author gender, (n missing, %)						Corresponding author gender, (n missing, %)						0	0
		Female	10981	7273	1119	8392		Male	17262	12229	2483	14712		28243	23104	51347
Gerding et. al				Jan	Feb	March	April	May	June	July	August	September	October	November	December	Sum	Scale
		Male	2018	17.01	14.85	14.85	18.65	20.55	16.75	13.98	14.85	19.6	25.47	21.93	19.08	217.57	42.64	Male pre-pandemic	1294.19		Total pre-pandemic	2016.07
																612.298	120
			2019	21.1	23.53	19.77	22.92	22.3	17.23	18.37	23.7	20.47	23	13.64	16.27	242.3		Male pandemic	823.255		Total pandemic	1295.17
																681.895
			2020	15.36	19.09	16.96	36.15	30.37	31.17	27.18	20.07	23.8	22.91	25.4	24.07	292.53
																823.255
		Female	2018	15.54	13.47	16.83	16.75	17.52	13.29	24.78	22.01	15.45	21.32	22.62	19.08	218.66	42.73
																307.035	60	Female pre-pandemic	721.882
			2019	24.23	22.65	26.85	26.76	23.18	17.67	28.51	27.55	30.26	27.55	18.19	22.04	295.44
																414.847		Female pandemic	471.912
			2020	19.72	19.72	27.8	31.71	40.5	34.01	27.53	19.01	34.64	22.03	31.79	27.62	336.08
																471.912
																		Sum	3311.24
Diaz et. al			Burnout	No burnout	N
		Women	28	17	45
		Men	18	114	132
Stenson et. al		N=100	Decrease in work productivity	No decrease in work productivity	N
		Women	30/52	22/52
		Men	31/48	17/48
Plaunova et. al			Mean productivity	SD	N
		Women	2.77	1.27	45.024
		Men	3.42	1.05	50.976
Candido et. al			Very negative	Negative	No impact	Positive	Very positive	Sum	Mean	SD
		Likert scale	1	2	3	4	5
		White Men	20	61	12	8	0
		White Women	22	65	6	6	0
		Non-white Men	29	52	9	10	1
		Non-white Women	29	53	7	10	1
		Women	51	118	13	16	1	199
		Men	49	113	21	18	1	202
		Proportion women	0.256281	0.592965	0.0653266	0.080402	0.00502513
		Proportion men	0.242574	0.559406	0.10396	0.0891089	0.0049505
		Women	0.256281	1.18593	0.19598	0.321608	0.0251256		0.396985	0.454586
		Men	0.242574	1.11881	0.311881	0.356436	0.0247525		0.410891	0.415738
Bell et. al			Pre-pandemic			Pandemic
			March	April	Sum	March	April	Sum
		Women	14	19	33	35	25	60		130
		Men	11	12	23	15	22	37
												3.43
Guintivano et. al			Disruption technology			Disruption domestic			Disruption combined
			Mean	SD	N1	Mean	SD	N2	Mean	SD	N							https://handbook-5-1.cochrane.org/chapter_7/table_7_7_a_formulae_for_combining_groups.htm
		Women	3.58	3.04	66	5.35	3.82	66	4.465	3.55179	66
		Men	3.25	2.89	48	3.04	3.27	48	3.145	3.07138	48
Amano Patino			NBER		CEPR		CEPR COVID Economics			VoxEU Columns			Total pre-pandemic	Total pandemic
			Avg[2015-2019]	2020	Avg[2015-2019]	2020	Total	Accepted	Rejected	2019	2020
		Number of papers/columns	380	461	274	403	129	55	74	217	397		871	1261
		Number of authors	1026	1318	713	1144	240	118	122	571	1040		2310	3502
		Number female authors	210.33	279.416	141.174	223.08	24	8.024	15.982	129.046	222.56		480.55	725.056		5812
		Number male authors	815.67	1038.58	571.826	920.92	216	109.976	106.018	441.954	817.44		1829.45	2776.94
		%Female authors	0.205	0.212	0.198	0.195	0.1	0.068	0.131	0.226	0.214		0.20803	0.207041
Wooden et. al			2018	2019	2020	Pre-pandemic	Pandemic
		N Distance mm	28.95	31.1	32.88					Scale	20000	37.98	526.593
		N	15244.9	16377	17314.4	31621.9		48936.3
		Proportion female distance mm	12.36	12.01	11.9					Scale	0.8	42.72	0.0187266
		Proportion female	0.231461	0.224906	0.222846	0.228066
		N female	3528.59	3683.3	3858.45	7211.89	3858.45
		N male	11716.3	12693.7	13455.9	24410	13455.9
					Prepandemc		Pandemic		Total
Rodriguez Forti et. al		First author ecology	2018	2019			2020
		Distance male (mm)	12.39	11.91			11.52
		N male	499.87	466.621	966.491		544.178
		Distance female (mm)	7.22	7.84			8.04
		N female	291.288	307.163	598.451	0.381422	379.791	0.407501
		Scale	19.73	19.73			19.73
		N total	796	773	1569		932		4070
		Last author ecology	2018	2019			2020
		Distance male (mm)	14.21	14.21			14.57
		N male	573.298	556.732	1130.03		688.253
		Distance female (mm)	5.09	4.92			4.4
		N female	205.354	192.76	398.115	0.253738	207.846	0.223011
		Scale	19.73	19.73			19.73
		N total	796	773	1569		932		4070
		First author medicine	2018	2019			2020
		Distance male (mm)	10.21	10.01			10.83
		N male	522.661	450.526	973.187		629.6
		Distance female (mm)	9.42	9.65			8.83
		N female	482.22	434.323	916.543	0.4829	513.33	0.447542
		Scale	19.73	19.73			19.73
		N total	1010	888	1898		1147		4943
		Last author medicine	2018	2019			2020
		Distance male (mm)	13.49	13.23			12.96
		N male	690.568	595.451	1286.02		753.427
		Distance female (mm)	6.04	6.24			6.33
		N female	309.194	280.847	590.042	0.310875	367.993	0.320831
		Scale	19.73	19.73			19.73
		N total	1010	888	1898		1147		4943
Ayyala et. al			First		Last		Corresponding
			Male	Female	Male	Female	Male	Female
		2017
		Quarter	Total submis- sions	Female first author submissions (%)	Male first author submissions (%)		Female last author submissions (%)	Male last author submissions (%)		Female correspond- ing author submis- sions (%)	Male correspond- ing author submis- sions (%)
		Q1 2019	60	25 (41.7)			17 (29.3)			23 (38.3)
		Q2 2019	57	27 (47.4)			28 (50.0)			24 (42.1)
		Q3 2019	56	29 (51.8)			23 (39.0)			24 (41.4)
		Q4 2019	59	22 (37.3)			23 (39.0)			20 (34.5)
		Pre-pandemic	172	78	94	0.453488	74	98	0.430233	68	104	0.395349
		Q1 2020	49	18 (36.7)			15 (30.6)			21 (42.9)
		Q2 2020	105	51 (48.5)			31 (30.3)			41 (39.0)
		Q3 2020	67	23 (34.3)			19 (28.8)			24 (34.8)
		Q4 2020	59	29 (49.2)			28 (47.5)			29 (49.2)
		Pandemic	231	103	128	0.445887	78	153	0.337662	94	137	0.406926
			403
				Q1 January–March, Q2 April–June, Q3 July–September, Q4 October–December
Harris et. al
			n
		Year	Female	Male
		2017	87	74
		2018	130	85
		2019	88	61
		Pre-pandemic	305	220		0.580952
		2020	108	67		0.617143
						700
Chen et. al			Women	Men
		Pre-pandemic	56	154		0.266667
		Pandemic	65	105		0.382353
		Total	121	259
Gao et. al
		Effect	Standard error	Scale
	Distance	6.56	4.97	25.64
	Measure	0.20468	0.15507	0.8
