# Supplementary material for: The effect of the COVID-19 pandemic on the gender gap in research productivity within academia
Source: eLife. 2023 Jul 6;12:e85427. doi: 10.7554/eLife.85427 (PMC10365834; doi:10.7554/eLife.85427)
Supplement: Supplementary file 3. [file elife-85427-supp3.xlsx]

## Sheet: References
Qualifiers missing	Item type	Authors	Title	Journal	Publication year	Volume	Issue	Pages	Publisher	Address	Date published	ISSN	URLs	Abstract	Keywords	Notes	Language
1	Journal Article	Krukowski RA,Montoya Williams DC,Cardel MI	A Year Into the Pandemic: An Update on Women in Science, Technology, Engineering, Math, and Medicine (STEMM)	Annals of the American Thoracic Society	2021				American Thoracic Society	[The University of Tennessee Health Science Center, 12326, Preventive Medicine, Memphis, Tennessee, United States; rkrukows@uthsc.edu., The Children's Hospital of Philadelphia, 6567, Department of Neonatology, Philadelphia, Pennsylvania, United States., University of Florida, 3463, Health Outcomes and Biomedical Informatics, Gainesville, Florida, United States.] United States	11 2021	2325-6621	http://search.ebscohost.com.proxy-ub.rug.nl/login.aspx?direct=true&db=cmedm&AN=34847335&site=ehost-live&scope=site	The coronavirus pandemic revealed long-standing, unaddressed fissures in our systems, including dramatic gender inequities in science, technology, engineering, mathematics and medicine (STEMM) fields. Women have disproportionately carried the burden of child care and other caregiving responsibilities during the pandemic, and there are strong indications that the pandemic will likely exacerbate pr…		Accession Number: 34847335. Language: English. Date Revised: 20211130. Date Created: 20211130. Update Code: 20211221. Publication Type: Journal Article. Journal ID: 101600811. Publication Model: Print-Electronic. Cited Medium: Internet. NLM ISO Abbr: Ann Am Thorac Soc. Linking ISSN: 23256621. Subset: MEDLINE; Date of Electronic Publication: 2021 Nov 30. ; Original Imprints: Publication: New York,…
1	Journal Article		COVID-19 publishing gap eases	Science	2021	371	6539	219-219			4 2021	0036-8075	http://search.ebscohost.com.proxy-ub.rug.nl/login.aspx?direct=true&db=pbh&AN=149858896&site=ehost-live&scope=site	The article presents a study published in BMJ Open, which reveals that the gender gap in authorship of COVID-19 research articles was most pronounced early in the covid-19 pandemic.	COVID-19, GENDER inequality, COVID-19 pandemic	Accession Number: 149858896; Source Information: 4/16/2021, Vol. 371 Issue 6539, p219; Subject Term: COVID-19; Subject Term: GENDER inequality; Subject Term: COVID-19 pandemic; Subject Term: ; Number of Pages: 1/5p; ; Document Type: Article; | RAYYAN-INCLUSION: Kiran=>Included | RAYYAN-INCLUSION: Kiran=>Included
2	Journal Article	Bender S,Brown KS,Hensley Kasitz DL,Vega O	Academic women and their children: Parenting during COVID‐19 and the impact on scholarly productivity	Family Relations	2022	71	1	46-67			2 2022	0197-6664	http://search.ebscohost.com.proxy-ub.rug.nl/login.aspx?direct=true&db=aph&AN=154483814&site=ehost-live&scope=site	Objective: We explored the experiences of academic mothers traversing the simultaneous demands of parenting and their professional roles throughout the pandemic to better understand the impact of COVID‐19 on engagement in scholarship. Background: In response to reports of reduced scholarship by women across academic disciplines, the goal of this study was to understand the lived experiences of wo…	PARENTING, MOTHER-child relationship, PARENT-child relationships, WOMEN scholars, EDUCATIONAL productivity, QUARANTINE, academia, academic productivity, childcare COVID‐19, parenting, quarantine, scholarship, women, Only Child, Child	Accession Number: 154483814; Bender, Sara 1 Brown, Kristina S. 2; Email Address: kbrown@adler.edu Hensley Kasitz, Deanna L. 3 Vega, Olga 4; Affiliation: 1: Department of Psychology, Central Washington University, Ellensburg WA,, United States 2: Couple and Family Therapy Department, Adler University, Chicago Illinois,, United States 3: Women and Gender Studies Program, Eastern Kentucky University…
2	Journal Article	Escalon MX,De Mesa C,Valdez G,Silver JK,Kirksey KM,Verduzco-Gutierrez M	Beyond a Hashtag: Strategies to Move Toward a More Inclusive Physiatry Workforce	American journal of physical medicine & rehabilitation	2021	100	7	712-717	Lippincott Williams & Wilkins	From the Department of Rehabilitation and Human Performance, Icahn School of Medicine at Mount Sinai, New York, New York (MXE, GV); Division of Pain Medicine, Department of Anesthesiology and Pain Medicine, University of California, Davis, Sacramento, California (CDM); Department of Physical Medicine and Rehabilitation, Harvard Medical School; Massachusetts General Hospital, Brigham and Women's H…	7 2021	1537-7385	http://search.ebscohost.com.proxy-ub.rug.nl/login.aspx?direct=true&db=cmedm&AN=33065579&site=ehost-live&scope=site	Abstract: The field of physical medicine and rehabilitation should strive for a physician workforce that is ethnically/racially, sex, and ability diverse. Considering the recent realities of disparities in health outcomes related to COVID-19 and in racial injustice in the United States, we are called to be champions for antiracism and equity. The specialty of physical medicine and rehabilitation …	Cultural Diversity*, Disabled Persons*, Physical and Rehabilitation Medicine*/education, Physical and Rehabilitation Medicine*/organization & administration, Physical and Rehabilitation Medicine*/standards, Workforce*/organization & administration, Workforce*/standards, Education, Medical, Graduate/*standards, Prejudice/*prevention & control, Humans, Prejudice/ethnology, Socioeconomic Factors, Un…	Accession Number: 33065579. Language: English. Date Revised: 20211124. Date Created: 20201016. Date Completed: 20210708. Update Code: 20211220. Publication Type: Journal Article. Journal ID: 8803677. Publication Model: Print. Cited Medium: Internet. NLM ISO Abbr: Am J Phys Med Rehabil. Comment: Comment in: Am J Phys Med Rehabil. 2021 Dec 1;100(12):e200-e201. (PMID: 34793379). Linked References: S…
2	Journal Article	O'leary M	Database Review	Information Today	2021	38	6	28-29	Information Today Inc.	Medford, New Jersey	7 2021	8755-6286	http://search.ebscohost.com.proxy-ub.rug.nl/login.aspx?direct=true&db=cin20&AN=151015260&site=ehost-live&scope=site	The article presents the highlights of the Global Gender Gap Report released by the Centre for the New Economy and Society in March 2021. Topics discussed include the 0.6% decline in the overall global gender gap for 2021, role of the COVID-19 pandemic in the global gender gap, and emergence of Scandinavian, Western European and sub-Saharan countries as the 10 countries with the smallest gender g…	COVID-19 Pandemic, United States, Sexism, Economics, International Agencies, Reports, Social Problems, Sex Factors, Women's Rights, Serial Publications, Resource Databases, Edit and Review, Socioeconomic Factors, Political Participation, Empowerment	Accession Number: 151015260. Language: English. Entry Date: 20210626. Revision Date: 20210626. Publication Type: Article; tables/charts. Journal Subset: Computer/Information Science; USA. NLM UID: 9880476. | RAYYAN-INCLUSION: Kiran=>Included | RAYYAN-INCLUSION: Kiran=>Included
2	Journal Article	O'leary M	Database Review	Information Today	2021	38	6	28-29	Information Today Inc.		7 2021	8755-6286	http://search.ebscohost.com.proxy-ub.rug.nl/login.aspx?direct=true&db=aph&AN=151015260&site=ehost-live&scope=site	The article presents the highlights of the Global Gender Gap Report released by the Centre for the New Economy and Society in March 2021. Topics discussed include the 0.6% decline in the overall global gender gap for 2021, role of the COVID-19 pandemic in the global gender gap, and emergence of Scandinavian, Western European and sub-Saharan countries as the 10 countries with the smallest gender g…	SOCIAL problems, DATABASES, PUBLISHING, SEXISM, REPORT writing, WOMEN'S rights, SERIAL publications, ECONOMICS, SEX distribution, SOCIOECONOMIC factors, SELF-efficacy, INTERNATIONAL agencies, POLITICAL participation, COVID-19 pandemic, UNITED States	Accession Number: 151015260; O'LEARY, MICK; Source Info: Jul/Aug2021, Vol. 38 Issue 6, p28; Subject Term: SOCIAL problems; Subject Term: DATABASES; Subject Term: PUBLISHING; Subject Term: SEXISM; Subject Term: REPORT writing; Subject Term: WOMEN'S rights; Subject Term: SERIAL publications; Subject Term: ECONOMICS; Subject Term: SEX distribution; Subject Term: SOCIOECONOMIC factors; Subject Term: …
2	Journal Article	Asio JM	Determinants of Work Productivity among Selected Tertiary Education Employees: A PreCOVID-19 Pandemic Analysis	Online Submission	2021	2	1		Online Submission		1 2021		http://search.ebscohost.com.proxy-ub.rug.nl/login.aspx?direct=true&db=eric&AN=ED611591&site=ehost-live&scope=site	The work productivity of an individual is an organizational asset that can be equated to progress and success. It provides satisfaction to the employees, the organization, and other stakeholders. This study assessed the work productivity among selected employees from a tertiary education institution before COVID-19 pandemic. To accomplish this task, a total of 70 individuals participated in the s…	Productivity, Job Performance, College Faculty, College Administration, Employee Attitudes, Postsecondary Education, Individual Characteristics, Departments, Gender Differences, COVID-19, Pandemics, Foreign Countries, Philippines	Accession Number: ED611591; Language: English; Education Level: Higher EducationPostsecondary Education; Journal Code: JAN2022; Level of Availability: Available online; Publication Type: Academic Journal; Publication Type: Report; Entry Date: 2021 | RAYYAN-INCLUSION: Kiran=>Included | RAYYAN-INCLUSION: Kiran=>Included
2	Journal Article	Ahluwalia-Cameron A	Dissertation Data Collection During a Global Pandemic: Barking Dogs, Crying Babies, and Feminist Social Work	Affilia: Journal of Women & Social Work	2022	37	1	20-25			2 2022	0886-1099	http://search.ebscohost.com.proxy-ub.rug.nl/login.aspx?direct=true&db=aph&AN=154664773&site=ehost-live&scope=site	COVID-19 has had a profound impact on our society. Research evidence has surfaced that there is a gender disparity in research productivity due to COVID-19. Notably, women in academia have been less productive in terms of academic publications since the beginning of the pandemic, likely due to the day-to-day responsibilities of childcare and domestic work; and according to pre-print literature, w…	HOME environment, PUBLISHING, HUMAN research subjects, FEMINISM, RESEARCH methodology, PATIENT selection, ACQUISITION of data, INTERVIEWING, SOCIAL work research, DOCTORAL programs, ACADEMIC dissertations, REFLEXIVITY, TECHNOLOGY, COVID-19 pandemic, REFLECTION (Philosophy), AUTHORSHIP, dissertation research, feminist social work, mothering, pandemic, qualitative research, Dogs, Crying, Social Work	Accession Number: 154664773; Ahluwalia-Cameron, Aman 1; Email Address: ahluwal2@uwindsor.ca; Affiliation: 1: University of Windsor, School of Social Work, Windsor, ON, Canada; Source Info: Feb2022, Vol. 37 Issue 1, p20; Subject Term: HOME environment; Subject Term: PUBLISHING; Subject Term: HUMAN research subjects; Subject Term: FEMINISM; Subject Term: RESEARCH methodology; Subject Term: PATIENT …
2	Journal Article	Górska AM,Kulicka K,Staniszewska Z,Dobija D	Deepening inequalities: What did COVID-19 reveal about the gendered nature of academic work?	Gender, Work and Organization	2021	28	4	1546-1561	John Wiley and Sons Inc	[Marketing Department, Kozminski University, Warszawa, Poland, State University of New York at Buffalo (SUNY Buffalo), Buffalo, NY, United States, Accounting Department, Kozminski University, Warszawa, Poland]	2021	0968-6673	https://www.scopus.com/inward/record.uri?eid=2-s2.0-85105919795&doi=10.1111%2fgwao.12696&partnerID=40&md5=a602fbfcbbdcc5eb84f914ffa7e74951	This study discusses the gendered nature of the transformation of academic work, which has been accelerated by the COVID-19 pandemic. We collected empirical material in spring 2020, at the peak of the pandemic, via 28 interviews with academics in Poland. The results illustrate the far-reaching and lasting impacts of the pandemic on academia that reinforce existing gender inequalities and bring ne…	COVID-19, gender inequality in academia, invisible academic work, women in academia, academic performance, epidemic, gender relations, higher education, institutional framework, organizational framework, womens status, Socioeconomic Factors	Cited By :6 Export Date: 28 February 2022 Correspondence Address: Górska, A.M.; Marketing Department, Poland; email: amg@kozminski.edu.pl | RAYYAN-INCLUSION: Kiran=>Included | RAYYAN-INCLUSION: Kiran=>Included	English
2	Journal Article	Parlak S,Celebi Cakiroglu O,Oksuz Gul F	Gender roles during COVID‐19 pandemic: The experiences of Turkish female academics	Gender, Work and Organization	2021	28		461-483	Wiley-Blackwell Publishing Ltd.	Celebi Cakiroglu, Oya, Department of Nursing Administration, Faculty of Health Sciences, Istanbul Medeniyet University, Istanbul, Turkey, 34720	7 2021			This study aims to explore the COVID‐19 experiences of Turkish female academics in terms of gender roles by focusing on how these women have dealt with domestic and academic responsibilities. The study group consisted of 21 female academics working from home, along with their spouses. Interpretative phenomenological analysis was used to analyze the data collected through semistructured telephone …	COVID‐19 pandemic, domestic responsibilities, academic responsibilities, female academics, gender roles, Educational Personnel, Family Work Relationship, Human Females, Academic Settings, COVID-19, Pandemics, Responsibility, Sex Roles, Spouses, European Cultural Groups, Quarantine, Job Demands	Accession Number: 2021-29053-001. Partial author list: First Author & Affiliation: Parlak, Simel; Department of Guidance and Psychological Counseling, Faculty of Education Sciences, Istanbul Okan University, Istanbul, Turkey. Other Publishers: Blackwell Publishing. Release Date: 20210322. Correction Date: 20210923. Publication Type: Journal (0100), Peer Reviewed Journal (0110). Format Covered: El…
2	Journal Article	Taylor CE,Arnold AC,Fanciulli A,Provini F,Fu Q,Macefield VG,Weese-Mayer DE,Shibao C,Charkoudian N,Claydon VE	Women in clinical autonomic research and the autonomic societies: how far have we come in thirty years?	Clinical Autonomic Research	2021	31	1	23-26	Springer Science and Business Media Deutschland GmbH	[School of Health Sciences, Western Sydney University, Sydney, Australia, Department of Neural and Behavioral Sciences, Pennsylvania State University College of Medicine, Hershey, PA, United States, Department of Neurology, Medical University of Innsbruck, Innsbruck, Austria, IRCCS Istituto Delle Scienze Neurologiche Di Bologna, UOC Clinica Neurologica NeuroMet, Ospedale Bellaria, Via Altura 3, B…	2021	0959-9851	https://www.scopus.com/inward/record.uri?eid=2-s2.0-85099345485&doi=10.1007%2fs10286-021-00768-8&partnerID=40&md5=66ee27788155c11565d5330f135a7838		adult, author, autonomic dysfunction, autonomic nervous system function, coronavirus disease 2019, Editorial, female, female by occupation, human, leadership, medical literature, medical research, medical society, orthostatic intolerance, pandemic, publication, sex determination, sex difference, autonomic nervous system, heart rate, Autonomic Nervous System, Female, Heart Rate, Humans	Export Date: 28 February 2022 CODEN: CAURE Correspondence Address: Taylor, C.E.; School of Health Sciences, Australia; email: C.Taylor@westernsydney.edu.au | RAYYAN-INCLUSION: Kiran=>Included | RAYYAN-INCLUSION: Kiran=>Included	English
2	Journal Article	Hannon M,Duffey K,Bharel S,Redfield R,Greidinger A,Stewart E,Diemer G	Investigating Gender Disparities in Internal Medicine Residency Awards	American Journal of Medicine	2021	134	3	405-409			3 2021	0002-9343	http://search.ebscohost.com.proxy-ub.rug.nl/login.aspx?direct=true&db=aph&AN=148863185&site=ehost-live&scope=site		RESIDENTS (Medicine), INTERNAL medicine, COVID-19, WOMEN physicians, CAREER development, PUBLICATION bias, Awards, Gender bias, Implicit bias, Residency, Women in medicine, Internship and Residency, Internal Medicine	Accession Number: 148863185; Hannon, Michelle 1; Email Address: Michelle.Hannon@jefferson.edu Duffey, Katherine 1 Bharel, Sonia 1 Redfield, Rachel 1 Greidinger, Alison 1 Stewart, Emily 2 Diemer, Gretchen 2; Affiliation: 1: Internal Medicine Residency, Department of Medicine, Thomas Jefferson University Hospital, Philadelphia 2: Division of Hospital Medicine, Department of Medicine, Thomas Jeffers…
2	Journal Article	Ali R,Ullah H	Lived experiences of women academics during the COVID-19 pandemic in Pakistan	Asian journal of social science	2021	49	3	145-152	Brill	[Assistant Professor Sociology, International Islamic University, Islamabad, 44000, Pakistan., Associate Professor Sociology, Quaid-i-Azam University, Islamabad, 44000, Pakistan.] Netherlands	9 2021	1568-4849	http://search.ebscohost.com.proxy-ub.rug.nl/login.aspx?direct=true&db=cmedm&AN=34493933&site=ehost-live&scope=site	This study explores the experiences of women academics while combining the challenging job of online teaching and familial responsibilities during the COVID-19 pandemic in Pakistan. The aim is to outline the disproportionate effects of COVID-19 on women academics. We employed a qualitative research design and collected data through in-depth qualitative telephonic interviews with thirteen women ac…	Academic publishing, COVID-19, Remote learning, Women academics, Work-life balance, Pakistan	Accession Number: 34493933. Language: English. Date Revised: 20210914. Date Created: 20210908. Update Code: 20211220. Publication Type: Journal Article. Journal ID: 101656833. Publication Model: Print-Electronic. Cited Medium: Print. NLM ISO Abbr: Asian J Soc Sci. PubMed Central ID: PMC8414285. Linking ISSN: 15684849. Subset: PubMed not MEDLINE; Date of Electronic Publication: 2021 Jun 19. ; Orig…
2	Journal Article	Samper-Gras T,Jabbaz M,Tomás S,Ferrer A	It’s Not the Creatures, It’s the Academy! Gender Pay Gaps and Research Careers in Academia	Asparkia	2021		39	165-184	Universitat Jaume I	[Institut Universitari d’Estudis de les Dones, Universitat de València, Spain, Universidad Complutense de Madrid, Spain]	2021	1132-8231	https://www.scopus.com/inward/record.uri?eid=2-s2.0-85121920053&doi=10.6035%2fASPARKIA.4600&partnerID=40&md5=12a846eabc132115d148f0917cc98647	The aim of this text is to present motherhood as an argument that naturalizes the difficulties of women in their academic careers and that displaces the current criteria of scientific evaluation. Based on a study of the salary gap at the Universitat de València, we identify and confront salary situations such as the wage penalty for motherhood and the earnings bonus for fatherhood in order to try…	Earnings bonus for fatherhood, Gender pay gap, Sexennial research, University, Wage penalty for motherhood	Export Date: 28 February 2022 | RAYYAN-INCLUSION: Kiran=>Included | RAYYAN-INCLUSION: Kiran=>Included	Spanish
2	Journal Article	Sutherl,G,Vazquez Corona M,Bohren M,King T,Moosad L,Maheen H,Scovelle A,Vaughan C	A rapid gender impact assessment of Australian university responses to COVID-19	Higher Education Research and Development	2021				Routledge	Centre for Health Equity, Melbourne School of Population and Global Health, University of Melbourne, Melbourne, Australia	2021	0729-4360	https://www.scopus.com/inward/record.uri?eid=2-s2.0-85113918757&doi=10.1080%2f07294360.2021.1971163&partnerID=40&md5=c55ee312c92a98c5e94c226e545d0eb1	In March 2020, the Australian government introduced a raft of public health initiatives to curb the rising cases of coronavirus disease 2019 (COVID-19) including closing schools and work from home orders. As a group of female academics, we were immediately attuned to the potential of COVID-19 to dilute progress made towards reducing the academic gender gap. This study emerged in response and comp…	COVID-19, gender impact assessment, policy, university	Export Date: 28 February 2022 Correspondence Address: Sutherland, G.; Georgina Sutherland, Australia; email: georgina.sutherland@unimelb.edu.au | RAYYAN-INCLUSION: Kiran=>Included | RAYYAN-INCLUSION: Kiran=>Included	English
2	Journal Article	Undurraga R,Simbürger E,Mora C	Overflow and despair versus flexibility and concentration: Academic teleworking and gender in times of pandemic	Polis (Italy)	2021	20	59	12-38	Societa Editrice Il Mulino	[Universidad Finis Terrae, Santiago, Chile, Universidad de Valparaíso, Valparaíso, Chile, Universidad Mayor, Santiago, Chile]	2021	1120-9488	https://www.scopus.com/inward/record.uri?eid=2-s2.0-85105336509&doi=10.32735%2fS0718-6568%2f2021-N59-1594&partnerID=40&md5=ca8d5f4524031000324bb5fbfbc722e0	The relationship between work and personal life has become evident during the COVID-19 pandemic: Paid work, domestic work, care work, personal and family life coexist in the same space and time. Work flooded home spaces and telecommuting was relocated to the center of the domestic realm. This qualitative research analyzes the experience of female academics working remotely during the pandemic in …	COVID-19, Gender work-life balance, Remote work, University	Cited By :4 Export Date: 28 February 2022 | RAYYAN-INCLUSION: Kiran=>Included | RAYYAN-INCLUSION: Kiran=>Included	Spanish
2	Journal Article	Dali K,Caidi N,Thompson KM,Garner J	Tales from Three Countries and One Academia: Academic Faculty in the Time of the Pandemic	Library Quarterly	2021	91	4	371-384			10 2021	0024-2519	http://search.ebscohost.com.proxy-ub.rug.nl/login.aspx?direct=true&db=lxh&AN=152890307&site=ehost-live&scope=site	Unsurprisingly, there are also disparities in how different segments of the faculty community have been affected - it is clear that the pandemic has disproportionately affected ... women, Black, brown, gay, nonbinary and disabled faculty members, while faculty of color also often come from or have family or friends in communities with high rates of COVID-19 (CHE [6], 5; Weyandt et al. [25]). I ha…	COVID-19 pandemic, Pandemics, Mental health services, Social order, Gratitude, University faculty, Loneliness	Accession Number: 152890307; Dali, Keren; Caidi, Nadia; Thompson, Kim M.; Garner, Jane; Source Info: Oct2021, Vol. 91 Issue 4, p371; Thesaurus Term: COVID-19 pandemic; Subject Term: Pandemics; Subject Term: Mental health services; Subject Term: Social order; Subject Term: Gratitude; Subject Term: University faculty; Subject Term: Loneliness; Number of Pages: 14p; Document Type: Article | RAYYAN-I…
2	Journal Article	Hipólito J,Diele-Viegas LM,Cordeiro TE,Sales LP,Medeiros A,Deegan KR,Leite L	Unwrapping the long-term impacts of covid-19 pandemic on brazilian academic mothers: The urgency of short, medium, and long-term measures	Anais da Academia Brasileira de Ciencias	2020	92	4	1-4	Academia Brasileira de Ciencias	[Kunhã Asé Network of Women in Science, Adhemar de Barros Ave, Ondina, Salvador, BA 40170-110, Brazil, National Institute for Research in the Amazon (INPA), Coordination of Research in Biodiversity – COBIO, 2936 André Araújo Ave, Petrópolis, Manaus, AM 69067-375, Brazil, Biology Department, University of Maryland, 4094 Campus Dr, College Park, MD 20742, United States, University of São Paulo, Sch…	2020	0001-3765	https://www.scopus.com/inward/record.uri?eid=2-s2.0-85095612307&doi=10.1590%2f0001-3765202020201292&partnerID=40&md5=92d2c27e8dd060213574acd7f0b9e14d	Since the beginning of the COVID-19 pandemic, publications have highlighted the disproportionate impact of the COVID-19 pandemic on academic mothers, mostly focusing on the impact of social distancing and quarantine. A few months later, despite the lack of effective vaccines or therapeutics in sight, many economic activities are being resumed. Nurseries and schools are expected to be among the la…	Coronavirus, Gender, Mothers in science, Pandemic, Betacoronavirus, Brazil, Coronavirus infection, female, human, mother, pandemic, virus pneumonia, Coronavirus Infections, Female, Humans, Mothers, Pandemics, Pneumonia, Viral	Cited By :4 Export Date: 28 February 2022 Correspondence Address: Hipólito, J.; Kunhã Asé Network of Women in Science, Adhemar de Barros Ave, Ondina, Brazil; email: jhdsousa@yahoo.com Correspondence Address: Hipólito, J.; National Institute for Research in the Amazon (INPA), 2936 André Araújo Ave, Petrópolis, Brazil; email: jhdsousa@yahoo.com | RAYYAN-INCLUSION: Kiran=>Included | RAYYAN-INCLUSION…	English
2	Journal Article	Das D,Lall MD,Walker L,Dobiesz V,Lema P,Agrawal P	The Multifaceted Impact of COVID-19 on the Female Academic Emergency Physician: A National Conversation	AEM education and training	2020	5	1	91-98	Wiley	[Columbia University Vagelos College of Physicians and Surgeons New York NY USA., Emory University Atlanta GA USA., Mayo Clinic Rochester MN USA., Brigham and Women's Hospital/Harvard Medical School Boston MA USA., Columbia University Vagelos College of Physicians and Surgeons New York NY USA., and the Department of Emergency Medicine Yale University New Haven CT USA.] United States	10 2020	2472-5390	http://search.ebscohost.com.proxy-ub.rug.nl/login.aspx?direct=true&db=cmedm&AN=33553984&site=ehost-live&scope=site	COVID-19 has impacted all health care professionals in every aspect of life. Female academic emergency physicians have been uniquely affected and continue to face challenges related to clinical workloads, work-life integration, academic productivity, leadership and visibility within departments, and mental health. This white paper, prepared on behalf of the Academy for Women in Academic Emergency…	Emergencies	Accession Number: 33553984. Language: English. Date Revised: 20211022. Date Created: 20210208. Update Code: 20211220. Publication Type: Journal Article. Journal ID: 101722142. Publication Model: Electronic-eCollection; eCollection. Cited Medium: Internet. NLM ISO Abbr: AEM Educ Train. PubMed Central ID: PMC7849338. Linked References: Ann Intern Med. 2004 Aug 3;141(3):205-12. (PMID: 15289217); Lan…
2	Journal Article	Minello A,Ra,Martucci S,Manzo LK	The pandemic and the academic mothers: present hardships and future perspectives	European Societies	2021	23		S82-S94			2 2021	1461-6696	http://search.ebscohost.com.proxy-ub.rug.nl/login.aspx?direct=true&db=aph&AN=148882874&site=ehost-live&scope=site	Gender differences in academia are well-known. Women publish less, achieve higher positions less frequently, and have more interrupted careers. Mothers, more than fathers or childless men and women, suffer these disadvantages. Women academics have to deal with the work-family conflict, the participation in both work and family roles are incompatibly demanding. The closure of childcare services an…	GENDER differences in education, MOTHERS, WOMEN college teachers, TEACHING, COMPETITION (Psychology), WORK-life balance, CHILD care, academy, competitiveness, gender, Mothers, research, teaching	Accession Number: 148882874; Minello, Alessandra 1; Email Address: alessandra.minello@unifi.it Martucci, Sara 2 Manzo, Lidia K. C. 3; Affiliation: 1: Department of Statistics, Computer Science, Applications G. Parenti (DiSIA), University of Florence, Firenze, Italy 2: Mercy College, Dobbs Ferry, USA 3: University of Milan, Milano, Italy; Source Info: 2021 Supplement, Vol. 23, pS82; Subject Term: …
2	Journal Article	Søgaard M,Nilsson KL,Tacconelli E	The SARS-CoV-2 pandemic puts the spotlight on gender inequality in clinical research	Clinical microbiology and infection : the official publication of the European Society of Clinical Microbiology and Infectious Diseases	2021	27	7	944-946	Elsevier	[Aalborg Thrombosis Research Unit, Department of Clinical Medicine, Faculty of Health, Aalborg University, Aalborg, Denmark; Department of Cardiology, Aalborg University Hospital, Aalborg, Denmark. Electronic address: mette.soegaard@rn.dk., The Danish Ministry of Health, Copenhagen, Denmark., Infectious Diseases, Department of Diagnostic and Public Health, University of Verona, Verona, Italy.] En…	7 2021	1469-0691	http://search.ebscohost.com.proxy-ub.rug.nl/login.aspx?direct=true&db=cmedm&AN=33813112&site=ehost-live&scope=site		COVID-19*, SARS-CoV-2*, Humans, Pandemics, Socioeconomic Factors	Accession Number: 33813112. Language: English. Date Revised: 20210714. Date Created: 20210404. Date Completed: 20210714. Update Code: 20211220. Publication Type: Journal Article, Comment. Journal ID: 9516420. Publication Model: Print-Electronic. Cited Medium: Internet. NLM ISO Abbr: Clin Microbiol Infect. PubMed Central ID: PMC8015373. Comment: Comment on: Clin Microbiol Infect. 2021 Jul;27(7):10…
2	Journal Article	Formanowicz	Why Documenting Every Gender Bias Counts: A Short Commentary	Social Psychological Bulletin	2021	16	1	1-1			1 2021	2569-653X	http://search.ebscohost.com.proxy-ub.rug.nl/login.aspx?direct=true&db=snh&AN=149604651&site=ehost-live&scope=site	In this short commentary accompanying a publication regarding yet another subtle gender bias in academia (Fleischmann & Van Berkel, 2021, this issue), I would like to emphasize why documenting every bias counts and that the change in global trends in gender equality will not happen without transforming our own (or every) field. Furthermore, sharing awareness on the presence of gender bias can aff…	SEX discrimination, SOCIAL scientists, SOCIAL psychology, APPLIED psychology, GENDER inequality, BYSTANDER effect (Psychology), APATHY, Bias (Epidemiology)	Accession Number: 149604651; Formanowicz 1; Email Address: magda.formanowicz@gmail.com; Affiliations: 1 : Center for Research on Social Relations, SWPS University of Social Sciences and Humanities in Warsaw, Warsaw, Poland; Source Info: 2021, Vol. 16 Issue 1, p1; Thesaurus Term: SEX discrimination; Thesaurus Term: SOCIAL scientists; Thesaurus Term: SOCIAL psychology; Thesaurus Term: APPLIED psych…
2	Journal Article	Allen KA,Butler-Henderson K,Reupert A,Longmuir F,Finefter-Rosenbluh I,Berger E,Grove C,Heffernan A,A,Freeman N,Kewalramani S,Krebs S,Dsouza L,Mackie G,Chapman D,Fleer M	Work Like a Girl: Redressing Gender Inequity in Academia through Systemic Solutions	Journal of University Teaching and Learning Practice	2021	18	3		Journal of University Teaching and Learning Practice		1 2021	1449-9789	http://search.ebscohost.com.proxy-ub.rug.nl/login.aspx?direct=true&db=eric&AN=EJ1304423&site=ehost-live&scope=site	Historically, the professional structure of higher education has provided restricted employment, career, and leadership opportunities for women. This is exacerbated where there is an intersection between gender and race, culture, religion, or age. Women continue to be underrepresented in senior leadership positions across a range of disciplines, and this lack of representation of women within the…	Gender Bias, Women Faculty, College Faculty, Barriers, Equal Opportunities (Jobs), COVID-19, Pandemics, Child Rearing, Responsibility, Foreign Countries, Grants, Financial Support, Faculty Publishing, Citations (References), Teacher Responsibility, Faculty Development, Conferences (Gatherings), Teacher Leadership, Teacher Promotion, Legislation, School Policy, Women Administrators, Role Models, C…	Accession Number: EJ1304423; Acquisition Information: University of Wollongong. Available from: Centre for Educational Development and Interactive Resources. Northfields Avenue, Wollongong, NSW 2522, Australia. Tel: +61-2-4221-3140; Fax: +61-2-4225-8312; e-mail: jutlp@uow.edu.au; Web site: http://ro.uow.edu.au/jutlp; Language: English; Education Level: Higher EducationPostsecondary Education; Jou…
2	Journal Article	Bowyer D,Deitz M,Jamison A,Taylor CE,Gyengesi E,Ross J,Hammond H,Ogbeide AE,Dune T	Academic mothers, professional identity and COVID‐19: Feminist reflections on career cycles, progression and practice	Gender, Work and Organization	2022	29	1	309-341	Blackwell Publishing Ltd.	School of Business, Western Sydney University, Penrith, New South Wales, Australia ; School of Humanities and Communication Arts, Western Sydney University, Penrith, New South Wales, Australia ; School of Health Sciences, Western Sydney University, Penrith, New South Wales, Australia ; School of Medicine, Western Sydney University, Penrith, New South Wales, Australia ; School of Psychology, Weste…	2022	0968-6673	http://server.proxy-ub.rug.nl/login?url=https://www.proquest.com/scholarly-journals/academic-mothers-professional-identity-covid-19/docview/2607637888/se-2?accountid=11219	Based on a collection of auto‐ethnographic narratives that reflect our experiences as academic mothers at an Australian university, this paper seeks to illustrate the impact of COVID‐19 on our career cycles in order to explore alternative feminist models of progression and practice in Higher Education. Collectively, we span multiple disciplines, parenting profiles, and racial/ethnic backgrounds. …	Business And Economics, Management, academia, career progression, COVID‐19, feminist theory, motherhood, professional identity, Narratives, Productivity, Feminism, Higher education, Profiles, Parents & parenting, Professional identity, Research, Careers, COVID-19, Gender inequality, Career breaks, Equality, Mothers, Alternative approaches, Feminist research	Copyright - © 2021 John Wiley & Sons Ltd. Last updated - 2021-12-08 | RAYYAN-INCLUSION: Kiran=>Included | RAYYAN-INCLUSION: Kiran=>Included	English
2	Journal Article	Wagner K,Pennell SM,Eilert M,Lim SR	Academic mothers with disabilities: Navigating academia and parenthood during COVID‐19	Gender, Work and Organization	2022	29	1	342-352	Blackwell Publishing Ltd.	Department of Psychology, Gallaudet University, Washington, District of Columbia, USA ; College of Educational and Social Services, University of Vermont, Burlington, Vermont, USA ; Department of Marketing and Supply Chain, University of Kentucky, Lexington, Kentucky, USA ; Department of Audiology, Central Michigan University, Mount Pleasant, Michigan, USA ; Department of Psychology, Gallaudet Un…	2022	0968-6673	http://server.proxy-ub.rug.nl/login?url=https://www.proquest.com/scholarly-journals/academic-mothers-with-disabilities-navigating/docview/2607637436/se-2?accountid=11219	Academic mothers (including nonbinary, trans, and genderqueer parents) have always faced challenges in their profession due to systemic barriers and a “motherhood tax”; however, COVID‐19 has exacerbated already existing inequalities (Oleschuk, 2020). This study examines how the pandemic has affected academic mothers with mental health and physical disabilities, as these voices often remain hidden…	Business And Economics, Management, acamama with disabilities, mental health in academia during pandemic, motherscholars with disabilities, parenting during academia, Non-binary gender, Higher education, Qualitative research, Health status, Inequality, COVID-19, Mothers, Intersectionality, Social justice, Taxation, Parents & parenting, Feminist theories, Pandemics, Feminism, Physically handicappe…	Copyright - © 2021 John Wiley & Sons Ltd. Last updated - 2021-12-08 | RAYYAN-INCLUSION: Kiran=>Included | RAYYAN-INCLUSION: Kiran=>Included	English
2	Journal Article	Grasso M,Klicperova-Baker M,Koos S,Kosyakova Y,Petrillo A,Vlase I	The impact of the coronavirus crisis on European societies. What have we learnt and where do we go from here? - Introduction to the COVID volume	EUROPEAN SOCIETIES	2021	23		S2-S32		[Queen Mary Univ London, Sch Polit & Int Relat, ArtsOne Bldg,Mile End Rd, London E1 4NS, England, Czech Acad Sci, Inst Psychol, Prague, Czech Republic, San Diego State Univ, Dept Polit Sci, San Diego, CA 92182 USA, Univ Konstanz, Dept Polit & Publ Adm, Constance, Germany, Inst Employment Res IAB, Regensburger Str 104, DE-90478 Nurnberg, Germany, Univ Mannheim, Chair Sociol, Area Societal Stratifi…	2021			The coronavirus pandemic, which first impacted European societies in early 2020, has created a twofold crisis by combining a health threat with economic turmoil. While the crisis has affected all European societies very significantly, its impact varies across countries, social groups, and societal domains. In an effort to provide a first overview of the effect of the coronavirus crisis, in this e…	Coronavirus crisis, COVID-19 pandemic, inequality, solidarity, Europe	RAYYAN-INCLUSION: Kiran=>Included | RAYYAN-INCLUSION: Kiran=>Included	English
2	Journal Article	Aldossari M,Chaudhry S	Women and burnout in the context of a pandemic	Gender, Work and Organization	2021	28	2	826-834	Blackwell Publishing Ltd.	University of Edinburgh Business School, Edinburgh, UK ; University of Edinburgh Business School, Edinburgh, UK Oxford	2021	0968-6673	http://server.proxy-ub.rug.nl/login?url=https://www.proquest.com/scholarly-journals/women-burnout-context-pandemic/docview/2516248450/se-2	This article presents the lived narrative of a female academic with children working in a British university and trying to cope with a completely new way of work and life in the context of the pandemic. The overall aim of the article is to offer a gendered account of burnout—specifically how women may be experiencing burnout at multiple levels, and the efficacy of their subsequent coping strategi…	Business And Economics, Management, burnout, coping, mothers, pandemic, second shift, women, Narratives, Women, Energy conservation, Coping, Burnout, Coping strategies, Pandemics, Gender differences, Efficacy, Disengagement	Copyright - © 2020. This article is published under http://creativecommons.org/licenses/by/4.0/ (the “License”). Notwithstanding the ProQuest Terms and Conditions, you may use this content in accordance with the terms of the License. Last updated - 2021-05-29 | RAYYAN-INCLUSION: Kiran=>Included | RAYYAN-INCLUSION: Kiran=>Included	English
2	Journal Article	Gottenborg E,Yu A,Naderi R,Keniston A,McBeth L,Morrison K,Schwartz D,Burden M	COVID-19's impact on faculty and staff at a School of Medicine in the US: what is the blueprint for the future?	BMC HEALTH SERVICES RESEARCH	2021	21	1			[Univ Colorado, Sch Med, Div Hosp Med, Dept Med, 12401 E 17th Ave, Aurora, CO 80045 USA, Univ Colorado, Sch Med, Dept Med, 12605 E 16th Ave, Aurora, CO 80045 USA, Univ Colorado, Dept Med, Div Gen Internal Med, 12605 E 16th Ave, Aurora, CO 80045 USA, Univ Colorado, Sch Med, Div Pulm Sci & Crit Care Med, Aurora, CO USA NR - 62 PU - BMC PI - LONDON PA - CAMPUS, 4 CRINAN ST, LONDON N1 9XW, ENGLAND]	2021			Background: The Coronavirus Disease 2019 (COVID-19) caused unprecedented challenges within medical centers, revealing inequities embedded in the medical community and exposing fragile social support systems. While faculty and staff faced extraordinary demands in workplace duties, personal responsibilities also increased. The goal of this study was to understand the impact of the COVID-19 pandemic…	ACADEMIC MEDICINE, GENDER-DIFFERENCES, WOMEN, RESPONSIBILITIES, COMPENSATION, PRODUCTIVITY, ADVANCEMENT, DISPARITIES, MOTHERHOOD, PHYSICIANS	RAYYAN-INCLUSION: Kiran=>Included | RAYYAN-INCLUSION: Kiran=>Included	English
2	Journal Article	Miller KE,Riley J	Changed Landscape, Unchanged Norms: Work-Family Conflict and the Persistence of the Academic Mother Ideal	INNOVATIVE HIGHER EDUCATION						Texas A&M Univ Commerce, Dept Curriculum & Instruct, Commerce, TX 75428 USA NR - 91 PU - SPRINGER PI - DORDRECHT PA - VAN GODEWIJCKSTRAAT 30, 3311 GZ DORDRECHT, NETHERLANDS				Extensive research suggests that ideal worker and mothering expectations have long constrained academic mothers' personal and professional choices. This article explores how academic mothers experienced their dual roles amid the unprecedented shift in the work-life landscape due to COVID-19. Content analysis of questionnaire data (n = 141) suggests that academic mothers experienced significant bi…	Academic motherhood, Ideal academic, Work-life conflict, COVID-19 pandemic, Higher education policy, GENDER-DIFFERENCES, FACULTY, WOMEN, MARRIAGE, CLOCK, TIME, CARE, JOB	RAYYAN-INCLUSION: Kiran=>Included | RAYYAN-INCLUSION: Kiran=>Included	English
2	Journal Article	Craig L,Churchill B	Dual‐earner parent couples’ work and care during COVID‐19	Gender, Work and Organization	2021	28		66-79	Blackwell Publishing Ltd.	School of Social and Political Sciences, University of Melbourne, Australia ; School of Social and Political Sciences, University of Melbourne, Australia Oxford	2021	0968-6673	http://server.proxy-ub.rug.nl/login?url=https://www.proquest.com/scholarly-journals/dual-earner-parent-couples-work-care-during-covid/docview/2489954465/se-2?accountid=11219	COVID‐19 and the associated lockdowns meant many working parents were faced with doing paid work and family care at home simultaneously. To investigate how they managed, this article draws a subsample of parents in dual‐earner couples (n = 1536) from a national survey of 2722 Australian men and women conducted during lockdown in May 2020. It asked how much time respondents spent in paid and unpai…	Business And Economics, Management, care, coronavirus, COVID‐19, dual‐earner couples, gender equality, unpaid labour, Gender differences, Working parents, Family work relationship, Work, Parents & parenting, Time, COVID-19, Families & family life, Child care, Home care, Job satisfaction, Pandemics, Fathers, Polls & surveys, Mothers, Couples, Working mothers, Unpaid	Copyright - © 2021 John Wiley & Sons Ltd. Last updated - 2021-09-12 | RAYYAN-INCLUSION: Kiran=>Included | RAYYAN-INCLUSION: Kiran=>Included	English
2	Journal Article	Carreri A,Dordoni A	Academic and Research Work from Home during the COVID-19 Pandemic in Italy: A Gender Perspective	Italian Sociological Review	2020	10	3	821-845,821A	Italian Sociological Review	Department of Sociology and Social Research, University of Trento, Italy; SEIN - Identity, Diversity & Inequality Research, Faculty of Business Economics, University of Hasselt, Belgium ; Department of Sociology and Social Research, University of Milan-Bicocca, Italy ; Department of Sociology and Social Research, University of Trento, Italy; SEIN - Identity, Diversity & Inequality Research, Facul…	2020		http://server.proxy-ub.rug.nl/login?url=https://www.proquest.com/scholarly-journals/academic-research-work-home-during-covid-19/docview/2470038719/se-2	The pandemic represents a turning point which affects the micro-politics of managing productive, reproductive and social life in our new everyday lives. In this article, we make a contribution to the recent and growing scientific debate by exploring academic researchers' processes of construction and de-construction of spatial, temporal and relational boundaries that take place in the pandemic wo…	Sociology, Space and time, Internet, Culture, Deconstruction, Gender, Families & family life, COVID-19, Neoliberalism, Work at home, Productivity, Debate, Construction, Family work relationship, Work life balance, Permeability, International relations, Pandemics, Medical research, Women, Coronaviruses, Researchers, Gender inequality, Italy	Copyright - © 2020. This work is published under https://creativecommons.org/licenses/by/3.0/ (the “License”). Notwithstanding the ProQuest Terms and Conditions, you may use this content in accordance with the terms of the License. Last updated - 2022-02-10 SubjectsTermNotLitGenreText - Italy | RAYYAN-INCLUSION: Kiran=>Included | RAYYAN-INCLUSION: Kiran=>Included	English
2	Journal Article	Utoft EH	‘All the single ladies’ as the ideal academic during times of COVID‐19?	Gender, Work and Organization	2020	27	5	778-787	Blackwell Publishing Ltd.	Department of Political Science, Aarhus University ; Department of Political Science, Aarhus University Oxford	2020	0968-6673	http://server.proxy-ub.rug.nl/login?url=https://www.proquest.com/scholarly-journals/all-single-ladies-as-ideal-academic-during-times/docview/2437243158/se-2?accountid=11219	Much of what has hitherto been written about women’s lived experiences of the coronavirus pandemic takes their status as mothers and the spouses of men for granted. Skewed care demands on women researchers working from home may translate into individual career disadvantage and cumulative, large‐scale gender inequalities in the future, which is undeniably a serious issue. However, the narrative th…	Business And Economics, Management, autoethnography, coronavirus, productivity, singlehood, work–life balance, Work at home, Productivity, Women, Single women, Spouses, COVID-19, Pandemics, Working women, Living alone, Mothers, Gender inequality	Copyright - © 2020 John Wiley & Sons Ltd Last updated - 2021-10-15 | RAYYAN-INCLUSION: Kiran=>Included | RAYYAN-INCLUSION: Kiran=>Included	English
2	Journal Article	Nash M,Churchill B	Caring during COVID‐19: A gendered analysis of Australian university responses to managing remote working and caring responsibilities	Gender, Work and Organization	2020	27	5	833-846	Blackwell Publishing Ltd.	School of Social Sciences, University of Tasmania, Australia ; School of Social and Political Sciences, University of Melbourne, Australia ; School of Social Sciences, University of Tasmania, Australia Oxford	2020	0968-6673	http://server.proxy-ub.rug.nl/login?url=https://www.proquest.com/scholarly-journals/caring-during-covid-19-gendered-analysis/docview/2437242756/se-2?accountid=11219	COVID‐19 is dramatically reconfiguring paid work and care. Emerging evidence in the global media suggests that academic women with caring responsibilities are being disproportionately impacted. This article fills a key knowledge gap by examining how Australian universities are supporting academics to manage remote work and caring during the COVID‐19 pandemic. We conducted a desktop analysis of pu…	Business And Economics, Management, care, COVID‐19, higher education, neoliberalism, pandemic, Women, Higher education, Labor force, Labor force participation, COVID-19, Pandemics, Academic staff, Colleges & universities, Caregiving	Copyright - © 2020 John Wiley & Sons Ltd Last updated - 2021-09-12 | RAYYAN-INCLUSION: Kiran=>Included | RAYYAN-INCLUSION: Kiran=>Included	English
3	Journal Article		Editorial: Gender in Academic Publishing; The Legality of the Israeli Annexation – Redux; In This Issue	European Journal of International Law	2020	31	2	387-403			9 2020	0938-5428	http://search.ebscohost.com.proxy-ub.rug.nl/login.aspx?direct=true&db=aph&AN=145986210&site=ehost-live&scope=site	An introduction is presented in which the editor discusses articles in the issue on topics including COVID-19 lockdown; gender discrimination; and sexual harassment.	COVID-19 pandemic, SEX discrimination	Accession Number: 145986210; Source Info: Sep2020, Vol. 31 Issue 2, p387; Subject Term: COVID-19 pandemic; Subject Term: SEX discrimination; Number of Pages: 17p; Document Type: Article; Full Text Word Count: 8943 | RAYYAN-INCLUSION: Kiran=>Included | RAYYAN-INCLUSION: Kiran=>Included
3	Journal Article	Quak E,Girault G,Lasnon C	Can someone look after my children while I write this COVID-19 paper?	European Journal of Nuclear Medicine and Molecular Imaging	2021	48	12	3751-3752	Springer Science and Business Media Deutschland GmbH	[Comprehensive Cancer Centre F. Baclesse, Nuclear Medicine Department, UNICANCER, Caen, F-14000, France, Comprehensive Cancer Centre F. Baclesse, Medical Library, UNICANCER, Caen, F-14000, France, UNICAEN, INSERM 1086 ANTICIPE, Normandy University, Caen, F-14000, France]	2021	1619-7070	https://www.scopus.com/inward/record.uri?eid=2-s2.0-85114040390&doi=10.1007%2fs00259-021-05496-9&partnerID=40&md5=ce1d3c6914ad4bc1c36c2a3dec350e0f		author, bibliometrics, career mobility, coronavirus disease 2019, female, human, Letter, male, medical literature, pandemic, publication, sex difference, child, Child, COVID-19, Humans, SARS-CoV-2, Only Child	Export Date: 28 February 2022 CODEN: EJNMA Correspondence Address: Quak, E.; Comprehensive Cancer Centre F. Baclesse, France; email: e.quak@baclesse.unicancer.fr | RAYYAN-INCLUSION: Kiran=>Included | RAYYAN-INCLUSION: Kiran=>Included	English
3	Journal Article	Vasti EC,Ouyang D,Ngo S,Sarraju A,Harrington RA,Rodriguez F	Gender Disparities in Cardiology-Related COVID-19 Publications	Cardiology & Therapy	2021	10	2	593-598			12 2021	2193-8261	http://search.ebscohost.com.proxy-ub.rug.nl/login.aspx?direct=true&db=aph&AN=153290633&site=ehost-live&scope=site	Introduction: Female authors are underrepresented in cardiology journals, although prior work suggested improvement in reducing disparities over time. Early in the recent COVID-19 pandemic, female authorship continued to lag that of their male counterparts despite a surge in publications. The cumulative impact of the COVID-19 pandemic on authorship gender disparities remains unclear. We aimed to …	COVID-19, COVID-19 pandemic, GENDER, PANDEMICS, LEADERSHIP in women, Cardiology, Gender disparities, SARS-CoV-2, Scientific publishing, Women	Accession Number: 153290633; Vasti, Elena C. 1 Ouyang, David 2 Ngo, Summer 3 Sarraju, Ashish 3 Harrington, Robert A. 1 Rodriguez, Fatima 3; Email Address: frodrigu@stanford.edu; Affiliation: 1: Department of Medicine, Stanford University, Stanford, CA, USA 2: Department of Cardiology, Smidt Heart Institute, Cedars-Sinai Medical Center, Los Angeles, CA, USA 3: Division of Cardiovascular Medicine a…
3	Journal Article	Misra V,Safi F,Brewerton KA,Wu W,Mason R,Chan AW,Rochon PA,Lega IC,Abdel-Qadir H	Gender disparity between authors in leading medical journals during the COVID-19 pandemic: a cross-sectional review	BMJ open	2021	11	7	e051224	BMJ Publishing Group Ltd	[Women's College Research Institute (WCRI), Women's College Hospital, Toronto, Ontario, Canada., Department of Medicine, University of Toronto, Toronto, Ontario, Canada., Department of Medicine, University of Toronto, Toronto, Ontario, Canada., Women's College Research Institute (WCRI), Women's College Hospital, Toronto, Ontario, Canada., Women's College Research Institute (WCRI), Women's College…	7 2021	2044-6055	http://search.ebscohost.com.proxy-ub.rug.nl/login.aspx?direct=true&db=cmedm&AN=34261692&site=ehost-live&scope=site	Objectives: Evaluate gender differences in authorship of COVID-19 articles in high-impact medical journals compared with other topics.; Design: Cross-sectional review.; Data Sources: Medline database.; Eligibility Criteria: Articles published from 1 January to 31 December 2020 in the seven leading general medical journals by impact factor. Article types included primary research, reviews, editori…	Authorship*, COVID-19*, Periodicals as Topic*, Cross-Sectional Studies, Europe, Female, Humans, Male, Pandemics, SARS-CoV-2, education & training (see medical education & training)*, journalism (see medical journalism)*, medical education & training*, medical journalism*, Cesarean Section	Accession Number: 34261692. Language: English. Date Revised: 20210720. Date Created: 20210715. Date Completed: 20210719. Update Code: 20211220. Publication Type: Journal Article, Research Support, Non-U.S. Gov't, Review. Journal ID: 101552874. Publication Model: Electronic. Cited Medium: Internet. NLM ISO Abbr: BMJ Open. PubMed Central ID: PMC8282422. Linked References: J Surg Res. 2002 Jun 1;105…
3	Journal Article	Mahmoudi M	Gender parity among the Altmetric Top 100 publications on COVID-19	Future science OA	2020	7	2	FSO651	Future Science Group	Department of Radiology & Precision Health Program, Michigan State University, East Lansing, MI 48824, USA. England	11 2020	2056-5623	http://search.ebscohost.com.proxy-ub.rug.nl/login.aspx?direct=true&db=cmedm&AN=33432271&site=ehost-live&scope=site		Altmetric, coronavirus, gender parity, integrated functioning, research, Parity	Accession Number: 33432271. Language: English. Date Revised: 20210428. Date Created: 20210112. Update Code: 20211220. Publication Type: Editorial. Journal ID: 101665030. Publication Model: Electronic. Cited Medium: Print. NLM ISO Abbr: Future Sci OA. PubMed Central ID: PMC7643633. Linked References: Nat Hum Behav. 2020 Sep;4(9):880-883. (PMID: 32669671); ACS Appl Mater Interfaces. 2020 Sep 16;12(…
3	Journal Article	Salter-Volz AE,Oyasu A,Yeh C,Muhammad LN,Woitowich NC	Sex and Gender Bias in Covid-19 Clinical Case Reports	Frontiers in global women's health	2021	2		774033	Frontiers Media S.A	[Department of Medical Social Sciences, Feinberg School of Medicine, Northwestern University, Chicago, IL, United States., Department of Medical Social Sciences, Feinberg School of Medicine, Northwestern University, Chicago, IL, United States.; University of Illinois at Urbana-Champaign, Champaign, IL, United States., Division of Biostatistics, Department of Preventive Medicine, Feinberg School o…	11 2021	2673-5059	http://search.ebscohost.com.proxy-ub.rug.nl/login.aspx?direct=true&db=cmedm&AN=34881381&site=ehost-live&scope=site	Clinical case reports circulate relevant information regarding disease presentation and describe treatment protocols, particularly for novel conditions. In the early months of the Covid-19 pandemic, case reports provided key insights into the pathophysiology and sequelae associated with Covid-19 infection and described treatment mechanisms and outcomes. However, case reports are often subject to …	COVID-19, bibliometrics, case reports (publication type), gender bias, sex bias, Bias (Epidemiology)	Accession Number: 34881381. Language: English. Date Revised: 20211211. Date Created: 20211209. Update Code: 20211221. Publication Type: Journal Article. Journal ID: 101776281. Publication Model: Electronic-eCollection; eCollection. Cited Medium: Internet. NLM ISO Abbr: Front Glob Womens Health. PubMed Central ID: PMC8647159. Linked References: Nat Hum Behav. 2017 Nov;1(11):791-796. (PMID: 3102413…
3	Journal Article	Walters C,Mehl GG,Piraino P,Jansen JD,Kriger S	The impact of the pandemic-enforced lockdown on the scholarly productivity of women academics in South Africa	Research Policy	2022	51	1	N.PAG-N.PAG			1 2022	0048-7333	http://search.ebscohost.com.proxy-ub.rug.nl/login.aspx?direct=true&db=buh&AN=153708332&site=ehost-live&scope=site	• It is the first comprehensive study on the impact of the pandemic lockdown on women's academic work, including research, teaching, and administration. • It builds on, extends, and we believe enriches recent and important studies in research policy titled which gender gap ? Factors affecting researchers' scientific impact in science and medicine and gender discrepancies in publication productivi…	COVID-19 pandemic, TELECOMMUTING, UNIVERSITIES & colleges, STAY-at-home orders, GENDER inequality, VIRAL shedding, SOUTH Africa, Careers, Childcare, COVID-19, Female academics, Gender gap, Gender in academia, South Africa	Accession Number: 153708332; Walters, Cyrill 1; Email Address: cyrillwalters@sun.ac.za; Mehl, Graeme G. 1; Piraino, Patrizio 2; Jansen, Jonathan D. 1; Kriger, Samantha 3; Affiliations: 1: Stellenbosch University, Faculty of Education, Stellenbosch, 7600, South Africa; 2: University of Notre Dame, Keough School of Global Affairs, Indiana, 46556, USA; 3: Cape Peninsula University of Technology, Fac…
3	Journal Article	Samper-Gras T,Jabbaz M,Tomás S,Ferrer A	¡No son las criaturas, es la Academia! Brechas salariales de género y carrera investigadora en la Universidad	Asparkía. Investigació Feminista	2021		39	165-184	Universitat Jaume I Servei de Comunicacio i Publicacions	Castellón	2021	1132-8231	http://server.proxy-ub.rug.nl/login?url=https://www.proquest.com/scholarly-journals/no-son-las-criaturas-es-la-academia-brechas/docview/2609751249/se-2	El objetivo del presente texto es presentar a la maternidad como argumento que naturaliza las dificultades de las mujeres en sus carreras académicas y que desplaza a los actuales criterios de evaluación científica. A partir de un estudio sobre la brecha salarial en la Universitat de València se identifican y se confrontan situaciones salariales como la penalización por maternidad y el plus salari…	Women's Studies, Plus de paternidad, Penalización de maternidad, Brechas salariales de género, Sexenios de investigación, Universidad, Earnings bonus for fatherhood, Wage penalty for motherhood, Gender pay gap, sexennial research, University, Plus de paternitat, Penalització de maternitat, Bretxes salarials de gènere, Sexennis d'investigació, Universitat, Women, Coronaviruses, COVID-19, Nuclear F…	Copyright - © 2021. This work is licensed under https://creativecommons.org/licenses/by-sa/4.0/deed.es (the “License”). Notwithstanding the ProQuest Terms and Conditions, you may use this content in accordance with the terms of the License. Last updated - 2021-12-14 | RAYYAN-INCLUSION: Kiran=>Included | RAYYAN-INCLUSION: Kiran=>Included	Spanish
3	Journal Article	Witteman HO,Haverfield J,Tannenbaum C	COVID-19 gender policy changes support female scientists and improve research quality	PROCEEDINGS OF THE NATIONAL ACADEMY OF SCIENCES OF THE UNITED STATES OF AMERICA	2021	118	6			[Univ Laval, Fac Med, Quebec City, PQ G1V 0A6, Canada, Canadian Inst Hlth Res, Inst Gender & Hlth, Ottawa, ON K1A 0W9, Canada, Univ Montreal, Fac Med, Montreal, PQ H3C 3J7, Canada, Univ Montreal, Fac Pharm, Montreal, PQ H3C 3J7, Canada NR - 14 PU - NATL ACAD SCIENCES PI - WASHINGTON PA - 2101 CONSTITUTION AVE NW, WASHINGTON, DC 20418 USA]	2021			With more time being spent on caregiving responsibilities during the COVID-19 pandemic, female scientists' productivity dropped. When female scientists conduct research, identity factors are better incorporated in research content. In order to mitigate damage to the research enterprise, funding agencies can play a role by putting in place gender equity policies that support all applicants and ens…	gender policy, female scientists, funding agency, CARE, SEX	RAYYAN-INCLUSION: Kiran=>Included | RAYYAN-INCLUSION: Kiran=>Included	English
3	Journal Article	Gamble LH	Editor's Corner	American Antiquity	2021	86	2	221-223	Cambridge University Press	Washington	2021	0002-7316	http://server.proxy-ub.rug.nl/login?url=https://www.proquest.com/scholarly-journals/editors-corner/docview/2516083739/se-2?accountid=11219	The authors propose reasons why we see more Canadian women than men in PhD programs but not in tenure-track positions, and they forewarn that the current COVID-19 pandemic may only increase these inequities. In order to determine if the number of submissions was relatively equal between men and women, perceived gender was based on multiple factors, including pronouns used on web pages and e-mail …	Archaeology, Editorials, Subjectivity, Publications, Pandemics, Gender, Women, Sex crimes, COVID-19, Canada, United States, US, California, North America	Name - American Antiquity Copyright - Copyright © The Author(s), 2021. Published by Cambridge University Press on behalf of the Society for American Archaeology Last updated - 2021-10-04 SubjectsTermNotLitGenreText - United States--US; Canada; North America; California | RAYYAN-INCLUSION: Kiran=>Included | RAYYAN-INCLUSION: Kiran=>Included	English
3	Journal Article	Chitsamatanga BB,A,Malinga W	Coronavirus (COVID-19) and women in higher education in a South African University : Academic and social implications	African Journal of Gender, Society & Development	2021	10	1	7-7–34	Adonis & Abbey Publishers Ltd	London	2021	2634-3614	http://server.proxy-ub.rug.nl/login?url=https://www.proquest.com/scholarly-journals/coronavirus-covid-19-women-higher-education-south/docview/2610974625/se-2?accountid=11219	History and present realities have presented a dual diachronic relationship between women in higher education and gender inequality. In quintessence, women are and continue to be faced by gendered disparities and practices by institutions of higher learning, coupled with the overarching demand of academic work vis-à-vis family responsibilities. The advent of the novel coronavirus disease (COVID-1…	Sociology, Higher education, Academic work, Learning, Social impact, COVID-19, Financial support, Women, Occupational segregation, Academic staff, Pandemics, Gender inequality, Capacity building approach, Coronaviruses	Copyright - Copyright Adonis & Abbey Publishers Ltd Mar 2021 Last updated - 2021-12-17 | RAYYAN-INCLUSION: Kiran=>Included | RAYYAN-INCLUSION: Kiran=>Included	English
3	Journal Article	White EM,Maduka RC,Ballouz D,Chen HR,Wexner SD,Behrns KE,Lillemoe KD,LeMaire SA,Smink DS,S,Hu G	Surgical research journals-Under review: An assessment of diversity among editorial boards and outcomes of peer review	AMERICAN JOURNAL OF SURGERY	2021	222	6	1104-1111		[Yale Sch Med, Dept Surg, 330 Cedar St, New Haven, CT 06519 USA, Yale Canc Ctr, Adv Training Program Phys Scientist NIH T32, New Haven, CT 06519 USA, Univ Michigan, WK Kellogg Eye Ctr, Ann Arbor, MI 48109 USA, Univ Alabama Birmingham, Dept Surg, Birmingham, AL 35294 USA, Cleveland Clin Florida, Dept Colorectal Surg, Weston, FL 33331 USA, Univ Florida, Hlth Cent Florida, Gainesville, FL USA, Massa…	2021			Background: The COVID-19 pandemic exposed racism as a public health crisis embedded in structural processes. Editors of surgical research journals pledged their commitment to improve structure and process through increasing diversity in the peer review and editorial process; however, little benchmarking data are available. Methods: A survey of editorial board members from high impact surgical res…	Diversity, Gender, Race, Surgical research, Editorial boards, RACISM, WOMEN	RAYYAN-INCLUSION: Kiran=>Included | RAYYAN-INCLUSION: Kiran=>Included	English
4	Journal Article	Langin K	Pandemic hit academic mothers hard, data show	Science	2021	371	6530	660-660			2 2021	0036-8075	http://search.ebscohost.com.proxy-ub.rug.nl/login.aspx?direct=true&db=ulh&AN=148737328&site=ehost-live&scope=site	The article presents the discussion on evidence highlighting the need for policy changes to aid female scientists. Topics include creating additional challenges for women especially those with children struggling for maintaining the research productivity; funding agency recognizing and correcting for a gender disparity early on in the pandemic; and involving disabilities, chronic illness, and car…	GOVERNMENT policySCIENTISTSAID (Feudal tax)GENDERCHRONIC diseases	Accession Number: 148737328; Issue Information: ; Subject Term: GOVERNMENT policy; Subject Term: SCIENTISTS; Subject Term: AID (Feudal tax); Subject Term: GENDER; Subject Term: CHRONIC diseases; Subject Term: ; Number of Pages: 1p; ; Illustrations: 1 Color Photograph; ; Document Type: Article; ; Lexile: 1310; ; Full Text Word Count: 833; | RAYYAN-INCLUSION: Kiran=>Included | RAYYAN-INCLUSION: Kir…
4	Journal Article	Gabster BP,van Daalen K,Dhatt R,Barry M	Challenges for the female academic during the COVID-19 pandemic	The Lancet	2020	395	10242	1968-1970	Lancet Publishing Group	[Department of Medicine, Stanford University, Stanford, CA 94305, United States, Center for Innovation in Global Health, Stanford University, Stanford, CA 94305, United States, Cardiovascular Epidemiology Unit, University of Cambridge, Cambridge, CB1 8RN, United Kingdom, Women in Global Health, Washington, DC, United States]	2020	0140-6736	https://www.scopus.com/inward/record.uri?eid=2-s2.0-85086789894&doi=10.1016%2fS0140-6736%2820%2931412-4&partnerID=40&md5=fe87107b7db996062632bced45643afa		Asia, career mobility, coronavirus disease 2019, cultural factor, Europe, family life, female, gender bias, human, information processing, leadership, Letter, medical education, medical research, pandemic, peer review, priority journal, professionalism, publishing, sex difference, United States, writing, Betacoronavirus, Coronavirus infection, virus pneumonia, Coronavirus Infections, Female, Huma…	Cited By :98 Export Date: 28 February 2022 CODEN: LANCA | RAYYAN-INCLUSION: Kiran=>Included | RAYYAN-INCLUSION: Kiran=>Included	English
4	Journal Article	Pinho-Gomes AC	The Time Is Ripe for Addressing Gender Inequalities in the Authorship of Scientific Papers	American Journal of Public Health	2021	111	1	15-16	American Public Health Association		1 2021	0090-0036	http://search.ebscohost.com.proxy-ub.rug.nl/login.aspx?direct=true&db=pbh&AN=147641850&site=ehost-live&scope=site	The article discusses gender inequalities in authorship during the COVID-19 pandemic for the submission of scholarly scientific papers, focusing particularly on those related to public health written predominantly by authors working from home. Topics include statistics for article submission both within the U.S. and outside the U.S., a comparison of the levels of article submission prior to the p…	AUTHORSHIP, GENDER inequality, COVID-19 pandemic, MEDICAL writing, SCIENCE periodicals, ENVIRONMENTAL sciences, SCIENCE, SERIAL publications, POPULATION health, Socioeconomic Factors	Accession Number: 147641850; Source Information: Jan2021, Vol. 111 Issue 1, p15; Subject Term: AUTHORSHIP; Subject Term: GENDER inequality; Subject Term: COVID-19 pandemic; Subject Term: MEDICAL writing; Subject Term: SCIENCE periodicals; Subject Term: ENVIRONMENTAL sciences; Subject Term: SCIENCE; Subject Term: SERIAL publications; Subject Term: POPULATION health; Subject Term: ; Number of Pages…
4	Journal Article	Pendlebury EC,Cushman M	Annual report on equity, diversity, and inclusion: Research and Practice in Thrombosis and Haemostasis is meeting its goals	Research and Practice in Thrombosis and Haemostasis	2021	5	7		John Wiley & Sons, Inc.	University of Vermont, Burlington, Vermont, USA ; Larner College of Medicine at the University of Vermont, Burlington, Vermont, USA ; University of Vermont, Burlington, Vermont, USA Hoboken	2021		http://server.proxy-ub.rug.nl/login?url=https://www.proquest.com/scholarly-journals/annual-report-on-equity-diversity-inclusion/docview/2597045407/se-2	The goal is representation of women at the level of membership by women in the ISTH, about 45%. Since RPTH launched in 2017, we have seen some fluctuations in representation of women authors. [...]42% of self-identified authors were women and 46% of assigned authors were women. [...]we aim to equitably include women as peer reviewers, which increases representation of women authors. 45 Reducing h…	Medical Sciences, Cardiovascular Diseases, authorship, peer review, publication, women, Editorials, Thrombosis, Peer review, Careers, Gender, Pandemics, Productivity, Medical research, Authorship, Multiculturalism & pluralism, Scholarly publishing, Ethnicity, Coronaviruses, COVID-19, Bias	Copyright - © 2021. This work is published under http://creativecommons.org/licenses/by-nc-nd/4.0/ (the “License”). Notwithstanding the ProQuest Terms and Conditions, you may use this content in accordance with the terms of the License. Last updated - 2021-11-29 | RAYYAN-INCLUSION: Kiran=>Included | RAYYAN-INCLUSION: Kiran=>Included	English
4	Journal Article		Progress on gender parity in research ‘set back a year’ by Covid	Times Higher Education	2021		2490		THE World Universities Insights Limited	London	2021	0049-3929	http://server.proxy-ub.rug.nl/login?url=https://www.proquest.com/trade-journals/progress-on-gender-parity-research-set-back-year/docview/2568048155/se-2?accountid=11219	The researchers observed that, pre-pandemic, Covid-related fields such as biology, health sciences and maths had seen the proportion of female authors increasing. Speaking to Times Higher Education, one of the authors, Margarita Torre, associate professor of sociology at the University Carlos III of Madrid, said their work builds on findings from previous studies that have demonstrated how women’…	Education, Higher Education, Research, Biology, Women, Pandemics, Higher education, Sociology, Gender equity, COVID-19, Parity	Copyright - Copyright THE World Universities Insights Limited Sep 2, 2021 Last updated - 2021-09-02 | RAYYAN-INCLUSION: Kiran=>Included | RAYYAN-INCLUSION: Kiran=>Included	English
4	Journal Article	Tso HH,Parikh JR	Mitigating delayed academic promotion of female radiologists due to the COVID pandemic	CLINICAL IMAGING	2021	76		195-198		Univ Texas MD Anderson Canc Ctr, Dept Breast Imaging, 1515 Holcombe Blvd,CPB5-3208, Houston, TX 77030 USA NR - 50 PU - ELSEVIER SCIENCE INC PI - NEW YORK PA - STE 800, 230 PARK AVE, NEW YORK, NY 10169 USA	2021			Achieving promotion in rank is considered an important measure of career success for academic radiologists. Multiple studies have shown prevailing gender inequities disadvantaging women in medicine. The recent global pandemic due to COVID-19 has affected all parts of society but has disproportionately impacted women and may delay academic promotion of female academic radiologists. We reviewed the…	Academics, Promotion, COVID, Pandemic, Accountability, GENDER-DIFFERENCES, WOMEN, MEDICINE, RANK	RAYYAN-INCLUSION: Kiran=>Included | RAYYAN-INCLUSION: Kiran=>Included	English
4	Journal Article	Herman E,Nicholas D,Watkinson A,Rodríguez-Bravo B,Abrizah A,Boukacem-Zeghmouri C,Jamali HR,Sims D,Allard S,Tenopir C,Xu J,Świgoń M,Serbina G,Cannon LP	The impact of the pandemic on early career researchers: what we already know from the internationally published literature	El Profesional de la Información	2021	30	2		El Profesional de la Informacion	Barcelona	2021	1386-6710	http://server.proxy-ub.rug.nl/login?url=https://www.proquest.com/scholarly-journals/impact-pandemic-on-early-career-researchers-what/docview/2515614483/se-2?accountid=11219	In order to take account of the impact of the pandemic on the already changing scholarly communications and work-life of early career researchers (ECRs), the 4-year long Harbingers study was extended for another two years. As a precursor to the study (featuring interviews and a questionnaire survey), currently underway, an analytic review of the pertinent literature was undertaken and its results…	Library And Information Sciences, Computer Applications, Covid-19, Pandemic, Restrictions, Lockdowns, Early career researchers, Junior researchers, Young scholars, ECR, Literature review, Prospects, Employment, Career development, Challenges, Financial problems, Future, New normal, Female researchers, Women researchers, Scholarly work, Careers, Scholarly communication, Pandemics	Copyright - Copyright El Profesional de la Informacion 2021 Last updated - 2021-04-23 | RAYYAN-INCLUSION: Kiran=>Included | RAYYAN-INCLUSION: Kiran=>Included	Spanish
4	Journal Article		Pandemic lockdown holding back female academics, data show	Times Higher Education	2020		2459		THE World Universities Insights Limited	London	2020	0049-3929	http://server.proxy-ub.rug.nl/login?url=https://www.proquest.com/trade-journals/pandemic-lockdown-holding-back-female-academics/docview/2446955952/se-2?accountid=11219	“Universities will need to account for the pandemic’s gendered effects on research when making decisions about hiring, tenure, promotion, merit pay and so on,” said Megan Frederickson, an associate professor of ecology and evolutionary biology at the University of Toronto, who has also found that the pandemic has skewed research along gender lines in a separate analysis. There are caveats to the …	Education, Higher Education, Research, Scientists, Science, Scholarly publishing, Schools, Success, Hypotheses, Coronaviruses, Funding, Gender, Pandemics, COVID-19	Copyright - Copyright THE World Universities Insights Limited Jun 25, 2020 Last updated - 2020-10-01 | RAYYAN-INCLUSION: Kiran=>Included | RAYYAN-INCLUSION: Kiran=>Included	English
1,2,3	Journal Article	Sebo P,Oertelt-Prigione S,de Lucia S,Clair C	COVID-19: a magnifying glass for gender inequalities in medical research	British Journal of General Practice	2020	70	700	526-527	Royal College of General Practitioners	[Primary Care Unit, University of Geneva, Geneva, Switzerland., Department of Primary and Community Care, Radboud University Medical Center, Nijmegen, the Netherlands., Department of Community Health and Medicine, Geneva University Hospital, Geneva, Switzerland., Center for Primary Care and Public Health, University of Lausanne, Lausanne, Switzerland. U2 - PMID: NLM33122265.]	11 2020	0960-1643	http://search.ebscohost.com.proxy-ub.rug.nl/login.aspx?direct=true&db=cin20&AN=146703786&site=ehost-live&scope=site		Disease Outbreaks, Research, Medical, Standards, COVID-19, Epidemiology, Pneumonia, Viral, Psychosocial Factors, Physicians, Women, Women's Rights, Trends, Socioeconomic Factors, Needs Assessment, Productivity, Family, Education, Sex Factors, Patient Selection, Mental Health	Accession Number: 146703786. Language: English. Entry Date: 20201112. Revision Date: 20220126. Publication Type: editorial; editorial. Journal Subset: Biomedical; Europe; Peer Reviewed; UK & Ireland. NLM UID: 9005323. | RAYYAN-INCLUSION: Kiran=>Included | RAYYAN-INCLUSION: Kiran=>Included
1,2,3	Journal Article	Taylor KA	EDI(torial): equality, diversity, and inclusion and platelets - 2021	Platelets	2021	32	1	3-4			1 2021	0953-7104	http://search.ebscohost.com.proxy-ub.rug.nl/login.aspx?direct=true&db=aph&AN=148164402&site=ehost-live&scope=site	Academia and its associated publication schema are not exempt from these same issues of inequality; this is not limited to race, but also extends to gender identity, disabilities, geography and sexual orientation. This gender discrepancy for speakers was similar to that for female last authors in the hematology journal I Research and Practice in Thrombosis and Hemostasis i (38% female senior auth…	EQUALITY, RACIAL inequality, BLACK Lives Matter movement, COVID-19 pandemic, Blood Platelets	Accession Number: 148164402; Taylor, Kirk A. 1; Email Address: k.a.taylor@reading.ac.uk; Affiliation: 1: Institute for Cardiovascular and Metabolic Research, School of Biological Sciences, University of Reading, Reading, UK; Source Info: 2021, Vol. 32 Issue 1, p3; Subject Term: EQUALITY; Subject Term: RACIAL inequality; Subject Term: BLACK Lives Matter movement; Subject Term: COVID-19 pandemic; N…
1,2,3	Journal Article	Harrop G	Colliding Identities During COVID-19: Identifying and Addressing the Challenges of Being an Academic Mother During a Global Pandemic	Frontiers in Education	2021	6			Frontiers Media S.A.	University of Worcester, School of Psychology, Worcester, United Kingdom	2021	2504-284X	https://www.scopus.com/inward/record.uri?eid=2-s2.0-85119456538&doi=10.3389%2ffeduc.2021.643221&partnerID=40&md5=931b100c0d40a2a4bb5442a3aef2d034	Academic workloads require a careful balance of teaching, research, supervision, and administrative responsibilities. Being an academic parent adds an additional level of responsibility to this, which has traditionally been successfully managed with organisation, careful planning and support. For many academic parents the Covid-19 pandemic disrupted this carefully curated balance, forcing them to…	academic, challenges, COVID-19, pandemic, parent	Export Date: 28 February 2022 Correspondence Address: Harrop, G.; University of Worcester, United Kingdom; email: g.harrop@worc.ac.uk | RAYYAN-INCLUSION: Kiran=>Included | RAYYAN-INCLUSION: Kiran=>Included	English
1,2,3	Journal Article	Donley T,Hsieh PY,Grant AB,Izeogu C,Turner AD,Williams N	Re: Academic Productivity Differences by Gender and Child Age in Science, Technology, Engineering, Mathematics, and Medicine Faculty during the COVID-19 Pandemic, by Krukowski et al	Journal of Women's Health	2021	30	9	1365-1366	Mary Ann Liebert Inc.	[NYU Langone Health Department of Population Health, 180 Madison Avenue, New York, NY 10016, United States, VA-New York Harbor Health Care System, New York, NY, United States, NYU Langone Health Department of Psychiatry, New York, NY, United States]	2021	1540-9996	https://www.scopus.com/inward/record.uri?eid=2-s2.0-85115253310&doi=10.1089%2fjwh.2021.0199&partnerID=40&md5=acd902d3959dca63e6f00a3a45c00355		care behavior, coronavirus disease 2019, engineering, human, Letter, mathematics, medical education, pandemic, productivity, science, sex difference, social support, technology, university, child, medical school, Child, COVID-19, Engineering, Faculty, Medical, Humans, Mathematics, Pandemics, SARS-CoV-2, Technology	Export Date: 28 February 2022 CODEN: JWHOA Correspondence Address: Donley, T.; NYU Langone Health Department of Population Health, 180 Madison Avenue, United States; email: tiffany.donley@nyulangone.org Correspondence Address: Williams, N.; NYU Langone Health Department of Population Health, 180 Madison Avenue, United States; email: natasha.williams2@nyulangone.org | RAYYAN-INCLUSION: Kiran=>Incl…	English
1,2,3	Journal Article	Marcotte LM,Arora VM,Ganguli I	Toward Gender Equity in Academic Promotions	JAMA Internal Medicine	2021	181	9	1155-1156	American Medical Association	[Department of Medicine, University of Washington, 1959 NE Pacific St, Seattle, WA 98105, United States, Department of Medicine, University of Chicago, Chicago, IL, United States, Department of Medicine, Brigham and Women's Hospital, Harvard University, Boston, MA, United States]	2021	2168-6106	https://www.scopus.com/inward/record.uri?eid=2-s2.0-85109964143&doi=10.1001%2fjamainternmed.2021.3471&partnerID=40&md5=16d39fb15ebf7daadd880befb9352fbc		career, coronavirus disease 2019, female physician, gender equity, gender inequality, human, medical education, medical school, mentor, Note, productivity, United States, ethics, female, male, university hospital, Academic Medical Centers, Faculty, Medical, Female, Gender Equity, Humans, Male	Export Date: 28 February 2022 Correspondence Address: Marcotte, L.M.; Department of Medicine, 1959 NE Pacific St, United States; email: leahmar@uw.edu | RAYYAN-INCLUSION: Kiran=>Included | RAYYAN-INCLUSION: Kiran=>Included	English
1,2,3	Journal Article	Robbins JB,Khosa F	No Time for Complacency: Near-term Impact of the COVID-19 Pandemic on Author Gender in Radiology	Radiology	2021	300	1	E308-E309	Radiological Society of North America Inc.	[Department of Radiology, University of Wisconsin School of Medicine and Public Health, 600 Highland Ave, F2/418 CSC, Madison, WI 53726, United States, Department of Radiology, University of British Columbia, Vancouver, Canada]	2021	0033-8419	https://www.scopus.com/inward/record.uri?eid=2-s2.0-85109051547&doi=10.1148%2fradiol.2021210449&partnerID=40&md5=f9843ffd6ce9c90e2c99037772c36613		author, coronavirus disease 2019, diagnostic imaging, Editorial, female physician, gender inequality, geographic distribution, human, lockdown, pandemic, radiologist, workforce, publication, radiology, COVID-19, Diagnostic Imaging, Humans, Pandemics, Periodicals as Topic, Radiology, SARS-CoV-2	Export Date: 28 February 2022 CODEN: RADLA Correspondence Address: Robbins, J.B.; Department of Radiology, 600 Highland Ave, F2/418 CSC, United States; email: jrobbins@uwhealth.org | RAYYAN-INCLUSION: Kiran=>Included | RAYYAN-INCLUSION: Kiran=>Included	English
1,2,3	Journal Article	Mandavilli A	For Women in Science, A New Career Hurdle	New York Times	2021	170	59027	D3-D3			4 2021	0362-4331	http://search.ebscohost.com.proxy-ub.rug.nl/login.aspx?direct=true&db=bwh&AN=149793047&site=ehost-live&scope=site	The article highlights the study that women who have published fewer papers, led fewer clinical trials and received less recognition for their expertise during the Covid-19 pandemic; and mentions that the compounding the frustration are the outdated notions about how to help women in science.	OCCUPATIONSWOMEN in science	Accession Number: 149793047; Issue Information: ; Subject Term: OCCUPATIONS; Subject Term: WOMEN in science; Subject Term: ; Number of Pages: 1/2p; ; Document Type: Article; | RAYYAN-INCLUSION: Kiran=>Included | RAYYAN-INCLUSION: Kiran=>Included
1,2,3	Journal Article	Parrish DE	From the Editor—Ethics, Power, and Professionalism in the Academy	Journal of Social Work Education	2022	58	1	1-4			2022	1043-7797	http://search.ebscohost.com.proxy-ub.rug.nl/login.aspx?direct=true&db=pbh&AN=155084584&site=ehost-live&scope=site	An editorial is presented on power intersecting with societal discrimination through racism, sexism, ableism, and ageism (among others) within academic settings. Topics include increasing collective awareness of the abuses of power within the academic hierarchy; and offering an intersectional lens for better understanding racial/gender disparities in academic settings before and during the twin p…	PROFESSIONAL ethics, SERIAL publications, PROFESSIONALISM, SOCIAL work education, POWER (Social sciences)	Accession Number: 155084584; Source Information: Winter 2022, Vol. 58 Issue 1, p1; Subject Term: PROFESSIONAL ethics; Subject Term: SERIAL publications; Subject Term: PROFESSIONALISM; Subject Term: SOCIAL work education; Subject Term: POWER (Social sciences); Subject Term: ; Number of Pages: 4p; ; Document Type: Editorial; ; Full Text Word Count: 2578; | RAYYAN-INCLUSION: Kiran=>Included | RAYYAN…
1,2,3	Journal Article	Oleschuk M	Gender equity considerations for tenure and promotion during COVID‐19	Canadian Review of Sociology	2020	57	3	502-515	Wiley-Blackwell Publishing Ltd.	Oleschuk, Merin, University of Guelph Initiative, University of Guelph, Guelph, ON, Canada, N1G2W1	8 2020			This article discusses gender equity considerations for tenure and promotion during COVID-19 in Canada. As the effects of COVID-19 emerge over time, it has become clear that the pandemic holds important implications for gendered inequalities in a variety of realms, including academia. Long-standing inequalities in both paid and domestic work appear to be exaggerated during the present pandemic ci…	gender equity considerations, tenure, promotion, COVID-19, faculty, universities, Betacoronavirus, Biomedical Research, Canada, Career Mobility, Coronavirus Infections, Faculty, Medical, Female, Humans, Male, Pandemics, Pneumonia, Viral, Publishing, Sexism, Women, Working, Work-Life Balance, Teacher Tenure, Academic Settings, Gender Equality, Coronavirus, Educational Personnel, Human Sex Differen…	Accession Number: 2020-65135-010. PMID: 32779307 Other Journal Title: Canadian Review of Sociology and Anthropology. Partial author list: First Author & Affiliation: Oleschuk, Merin; University of Guelph, Guelph, ON, Canada. Other Publishers: Canadian Sociology and Anthropology Assn. Release Date: 20201001. Publication Type: Journal (0100), Peer Reviewed Journal (0110). Format Covered: Electronic…
1,2,3	Journal Article	Wolfman DJ,Porter KK,Johnson DL,Parikh JR	Unsustainable: COVID-19 Demands Increased Support for Radiologists	Clinical Imaging	2021	73		18-19	Elsevier Inc.	[Department of Radiology, Johns Hopkins School of Medicine, 5255 Loughboro Rd, NW, Washingon, DC 20016, United States, MR Modality Chief, University of Alabama at Birmingham, Department of Radiology, Abdominal Imaging Section, JTN 374, 619 19th St S, Birmingham, AL 35249-6830, United States, MBB Radiology/RadPartners, Breast Imaging Section, Jacksonville, FL, United States, Department of Breast I…	2021	0899-7071	https://www.scopus.com/inward/record.uri?eid=2-s2.0-85097374804&doi=10.1016%2fj.clinimag.2020.11.038&partnerID=40&md5=4071486d526933de4ba51f2223465108	Life is sometimes described as a complex tapestry and progress is not linear, but twisted like stitches, contributing to the final fabric. When tension arises, the most recent stitches unravel first. The COVID-19 pandemic is pulling back the thread of humanity's progress. Those disproportionately affected by the pandemic's tension are those whose progress is most recent and, therefore most tenuou…	Burnout, COVID-19, Diversity, Leadership, Women in radiology, burnout, caregiver, child care, coronavirus disease 2019, disease exacerbation, Editorial, employment, feasibility study, health workforce, household, human, medical education, priority journal, probability, radiologist, task performance, female, pandemic, radiology, Female, Humans, Pandemics, Radiologists, Radiology, SARS-CoV-2	Cited By :3 Export Date: 28 February 2022 CODEN: CLIME Correspondence Address: Wolfman, D.J.; Department of Radiology, 5255 Loughboro Rd, NW, United States; email: dwolfma1@jhmi.edu | RAYYAN-INCLUSION: Kiran=>Included | RAYYAN-INCLUSION: Kiran=>Included	English
1,2,3	Journal Article	Erkmen CP,Ortmeyer KA,Pelletier GJ,Preventza O,Cooke DT,of Thoracic Surgeons Workforce on Diversity S,Inclusion	An Approach to Diversity and Inclusion in Cardiothoracic Surgery	Annals of Thoracic Surgery	2021	111	3	747-752	Elsevier Inc.	[Department of Thoracic Medicine and Surgery, Lewis Katz School of Medicine, Temple University, Philadelphia, PA, United States, Department of Anesthesiology & Critical Care, Nemours Children's Health System, Wilmington, DE, United States, Division of Cardiothoracic Surgery, Baylor College of Medicine, Houston, TX, United States, Section of General Thoracic Surgery, Department of Surgery, Univers…	2021	0003-4975	https://www.scopus.com/inward/record.uri?eid=2-s2.0-85100890290&doi=10.1016%2fj.athoracsur.2020.10.056&partnerID=40&md5=49ed5ebca22a64635f1d74223d2a33ac	Executive Summary: While the United States (US) population at large is rapidly diversifying, cardiothoracic surgery is among the least diverse specialties in terms of racial and gender diversity. Lack of diversity is detrimental to patient care, physician well-being, and the relevance of cardiothoracic surgery on our nation's health. Recent events, including the coronavirus disease 2019 pandemic …	Article, coronavirus disease 2019, cultural diversity, demography, human, leadership, mentor, pandemic, patient care, physician, physician assistant, priority journal, race difference, racism, self evaluation, sexism, thoracic surgeon, thorax surgery, United States, wellbeing, comorbidity, epidemiology, minority group, surgery, Comorbidity, COVID-19, Humans, Minority Groups, Pandemics, SARS-CoV-2…	Cited By :6 Export Date: 28 February 2022 CODEN: ATHSA Correspondence Address: Erkmen, C.P.; Department of Thoracic Medicine and Surgery, Parkinson Pavilion, Zone C, Ste 501, 3401 N Broad St, United States; email: cherie.erkmen@tuhs.temple.edu | RAYYAN-INCLUSION: Kiran=>Included | RAYYAN-INCLUSION: Kiran=>Included	English
1,2,3	Journal Article	Poff D	How May the Pandemic Impact Scholarly Communities That Already Face Discrimination?	Journal of Scholarly Publishing	2020	51	4	268-272	University of Toronto Press		7 2020	1198-9742	http://search.ebscohost.com.proxy-ub.rug.nl/login.aspx?direct=true&db=aph&AN=144497392&site=ehost-live&scope=site	In this brief article, the author speculates on the possible negative impacts of the COVID-19 pandemic on scholarship and scholarly output for academics who may already experience discrimination in the workplace. [ABSTRACT FROM AUTHOR] Copyright of Journal of Scholarly Publishing is the property of University of Toronto Press and its content may not be copied or emailed to multiple sites or poste…	SCHOLARLY publishing, SCHOLARSHIPS, COVID-19 pandemic, PUBLISHING, SCHOLARS, EMPLOYMENT discrimination, WORK environment, discrimination, scholarly output, women, workplace, Discrimination (Psychology)	Accession Number: 144497392; Poff, Deborah 1; Affiliation: 1: Journal of Academic Ethics; Source Info: Jul2020, Vol. 51 Issue 4, p268; Subject Term: SCHOLARLY publishing; Subject Term: SCHOLARSHIPS; Subject Term: COVID-19 pandemic; Subject Term: PUBLISHING; Subject Term: SCHOLARS; Subject Term: EMPLOYMENT discrimination; Subject Term: WORK environment; Author-Supplied Keyword: discrimination; Aut…
1,2,3	Journal Article	Beeman A	If Only We Are Brave Enough to Be It: Demanding More from Diversity, Equity, and Inclusion Efforts to Support Women Faculty of Color	Critical Sociology (Sage Publications, Ltd. )	2021	47	7	1099-1109			11 2021	0896-9205	http://search.ebscohost.com.proxy-ub.rug.nl/login.aspx?direct=true&db=aph&AN=153685625&site=ehost-live&scope=site	The Black Lives Matter protests, the racial inequality laid bare by the COVID-19 pandemic, and the January 6, 2021 attack on the U.S. Capitol prompted several organizations and academic institutions to write statements in support of the Movement for Black Lives and to re-evaluate their dedication to Diversity, Equity, and Inclusion (DEI). Using auto-ethnographical analysis, I address the inadequa…	BLACK Lives Matter movement, COVID-19 pandemic, RACIAL inequality, DIVERSITY & inclusion policies, color-blind, diversity, equity, inclusion, race, racism, Sociology, UNITED States Capitol (Washington, D.C.), Color	Accession Number: 153685625; Beeman, Angie 1; Email Address: Angie.Beeman@baruch.cuny.edu; Affiliation: 1: Baruch College, USA; Source Info: Nov2021, Vol. 47 Issue 7/8, p1099; Subject Term: BLACK Lives Matter movement; Subject Term: COVID-19 pandemic; Subject Term: RACIAL inequality; Subject Term: DIVERSITY & inclusion policies; Author-Supplied Keyword: color-blind; Author-Supplied Keyword: diver…
1,2,3	Journal Article	Look C	Lockdowns Rein in Female Economists While Men Keep Working	Bloomberg. com	2020			N.PAG-N.PAG	Bloomberg, L.P.		4 2020		http://search.ebscohost.com.proxy-ub.rug.nl/login.aspx?direct=true&db=buh&AN=142889158&site=ehost-live&scope=site	(Bloomberg) -- Female economists, who have long faced an uphill battle to influence academia and policy making, now face an additional challenge amid the coronavirus pandemic. The struggles of working from home for economists during lockdown appear to disproportionately affect output from women, Wellesley College professor Olga Shurchkov said in a blog post published on Medium. [Extracted from th…	MALE employees, ECONOMISTS, TELECOMMUTING	Accession Number: 142889158; Look, Carolynn; Issue Info: 4/24/2020, pN.PAG; Thesaurus Term: MALE employees; Thesaurus Term: ECONOMISTS; Thesaurus Term: TELECOMMUTING; Number of Pages: 1p; Document Type: Article; Full Text Word Count: 241 | RAYYAN-INCLUSION: Kiran=>Included | RAYYAN-INCLUSION: Kiran=>Included
1,2,3	Journal Article	Nocco MA,McGill BM,MacKenzie CM,Tonietto RK,Dudney J,Bletz MC,Young T,Kuebbing SE	Mentorship, equity, and research productivity: lessons from a pandemic	Biological Conservation	2021	255		N.PAG-N.PAG			3 2021	0006-3207	http://search.ebscohost.com.proxy-ub.rug.nl/login.aspx?direct=true&db=8gh&AN=149293376&site=ehost-live&scope=site	The coronavirus pandemic is more fully exposing ubiquitous economic and social inequities that pervade conservation science. In this time of prolonged stress on members of the research community, primary investigators or project leaders (PLs) have a unique opportunity to adapt their programs to jointly create more equitable and productive research environments for their teams. Institutional guida…	Pandemics, COVID-19 pandemic, Mentoring, Mental health, Career development, Health care teams, Virtual communities, Coronavirus, COVID-19, Diversity, Equity, Mentorship, Pandemic, Mentors	Accession Number: 149293376; Nocco, Mallika A. 1; Email Address: manocco@ucdavis.edu; McGill, Bonnie M. 1,2; Email Address: bonniemcgill@gmail.com; MacKenzie, Caitlin McDonough 1,3; Email Address: caitlin.mcdonough@gmail.com; Tonietto, Rebecca K. 4; Email Address: tonietto@umich.edu; Dudney, Joan 5; Email Address: jdudney@ucdavis.edu; Bletz, Molly C. 6; Email Address: molly.bletz@gmail.com; Young…
1,2,3	Journal Article	Berenbaum MR	On COVID-19, cognitive bias, and open access	Proceedings of the National Academy of Sciences of the United States of America	2021	118	2		National Academy of Sciences	Pnas	2021	0027-8424	https://www.scopus.com/inward/record.uri?eid=2-s2.0-85099721801&doi=10.1073%2fPNAS.2026319118&partnerID=40&md5=7d4d708474086742a737b1e10bfe3a95		access to information, cognitive bias, coronavirus disease 2019, cultural factor, death, decision making, gender bias, human, medical literature, medical research, politics, priority journal, publishing, racism, Review, social distancing, virus transmission, working memory, cognition, Coronavirinae, Access to Information, Cognition, Coronavirus, COVID-19, Humans, Physical Distancing, SARS-CoV-2, …	Cited By :2 Export Date: 28 February 2022 CODEN: PNASA Correspondence Address: Berenbaum, M.R.; Pnas | RAYYAN-INCLUSION: Kiran=>Included | RAYYAN-INCLUSION: Kiran=>Included	English
1,2,3	Journal Article	Collins C	Productivity in a pandemic	Science	2020	369	6504	603-603			8 2020	0036-8075	http://search.ebscohost.com.proxy-ub.rug.nl/login.aspx?direct=true&db=pbh&AN=145015078&site=ehost-live&scope=site	The article discusses on the negative impact of COVID-19 pandemic on scientific research. It mentions about addressing the problems of fewer women being granted tenure and promotion, a larger gender pay gap, and even some women being pushed out of science. It also informs on increasing publications made by women scientists.	COVID-19 pandemic, RESEARCH, WOMEN scientists, PROMOTIONS, GENDER wage gap	Accession Number: 145015078; Source Information: 8/7/2020, Vol. 369 Issue 6504, p603; Subject Term: COVID-19 pandemic; Subject Term: RESEARCH; Subject Term: WOMEN scientists; Subject Term: PROMOTIONS; Subject Term: GENDER wage gap; Subject Term: ; Number of Pages: 1p; ; Document Type: Article; | RAYYAN-INCLUSION: Kiran=>Included | RAYYAN-INCLUSION: Kiran=>Included
1,2,3	Journal Article	Jagsi R,Fuentes-Afflick E,Higginbotham E	Promoting Equity for Women in Medicine - Seizing a Disruptive Opportunity	New England Journal of Medicine	2021	384	24	2265-2267			6 2021	0028-4793	http://search.ebscohost.com.proxy-ub.rug.nl/login.aspx?direct=true&db=aph&AN=150951040&site=ehost-live&scope=site	The article focuses on Covid-19 began to affect the U.S. in early 2020, the National Academies of Sciences, Engineering, and Medicine has published a report detailing practices for addressing long-standing issues of women in influential positions in science, technology, engineering, mathematics, and medicine. Topics include the report emphasized the ways in which cultural among disciplines, and t…	SHAMANS, WOMEN in medicine, COVID-19 pandemic, WOMEN in science, SEX discrimination	Accession Number: 150951040; Jagsi, Reshma 1 Fuentes-Afflick, Elena 2 Higginbotham, Eve 3; Affiliation: 1: Department of Radiation Oncology and the Center for Bioethics and Social Sciences, University of Michigan, Ann Arbor, San Francisco 2: The Department of Pediatrics, Zuckerberg San Francisco General Hospital, and the Dean's Office, University of California, San Francisco - San Francisco 3: Th…
1,2,3	Journal Article	Tran BX,Ha GH,Nguyen LH,Vu GT,Hoang MT,Le HT,Latkin CA,Ho CSH,Ho RCM	Studies of Novel Coronavirus Disease 19 (COVID-19) Pandemic: A Global Analysis of Literature	INTERNATIONAL JOURNAL OF ENVIRONMENTAL RESEARCH AND PUBLIC HEALTH	2020	17	11			[Hanoi Med Univ, Inst Prevent Med & Publ Hlth, Hanoi 100000, Vietnam, Johns Hopkins Univ, Bloomberg Sch Publ Hlth, Baltimore, MD 21205 USA, Duy Tan Univ, Inst Global Hlth Innovat, Da Nang 550000, Vietnam, Duy Tan Univ, Fac Pharm, Da Nang 550000, Vietnam, Vietnam Natl Univ, VNU Sch Med & Pharm, Hanoi 100000, Vietnam, Nguyen Tat Thanh Univ, Ctr Excellence Evidence Based Med, Ho Chi Minh City 700000…	2020			Novel coronavirus disease 19 (COVID-19) is a global threat to millions of lives. Enormous efforts in knowledge production have been made in the last few months, requiring a comprehensive analysis to examine the research gaps and to help guide an agenda for further studies. This study aims to explore the current research foci and their country variations regarding levels of income and COVID-19 tra…	scientometrics, content analysis, text mining, COVID-19, HEALTH	RAYYAN-INCLUSION: Kiran=>Included | RAYYAN-INCLUSION: Kiran=>Included	English
1,2,3	Journal Article	Idriss-Wheeler D,El-Mowafi IM,Coen-Sanchez K,Yalahow A,Yaya S	Looking through the lens of reproductive justice: the need for a paradigm shift in sexual and reproductive health and rights research in Canada	Reproductive Health	2021	18		1-7	BioMed Central	London	2021		http://server.proxy-ub.rug.nl/login?url=https://www.proquest.com/scholarly-journals/looking-through-lens-reproductive-justice-need/docview/2553209390/se-2	[...]the Canadian government has only recently found the political will to admit to the systematic oppression of Indigenous populations, and nearly half of Canadians surveyed believe that anti-Black racism is “no longer a problem” [3]. [...]it is not surprising that students and faculty continue to witness Canadian post-secondary institutions release hastily constructed, platitudinous statements …	Medical Sciences, Native peoples, Students, Racism, Racial discrimination, Success, Oppression, Pandemics, Reproductive health, Medical research, Research funding, Health disparities, Researchers, Secondary education, Data collection, Race, Grants, Education, Health services, Social privilege, Accountability, COVID-19, Canada, United States, US	Copyright - © 2021. This work is licensed under http://creativecommons.org/licenses/by/4.0/ (the “License”). Notwithstanding the ProQuest Terms and Conditions, you may use this content in accordance with the terms of the License. Last updated - 2021-07-20 SubjectsTermNotLitGenreText - United States--US; Canada | RAYYAN-INCLUSION: Kiran=>Included | RAYYAN-INCLUSION: Kiran=>Included	English
1,2,3	Journal Article	Debowski S	Shifting sands: navigating being academic in an evolving sector	HIGHER EDUCATION RESEARCH & DEVELOPMENT	2022	41	1	7-20			2022			The evolution of the higher education sector has included a strong focus on academic performance despite increasing workloads and employment precarity, with COVID-19 further disrupting traditional university expectations. Drawing on HERD's author voices from 2010 to 2020, this reflective review examines the changing nature of academe, mapping the shifts in role and identity that occur through an …	Academic identity, academic careers, academic leadership, higher education development, university leadership, EARLY CAREER ACADEMICS, HIGHER-EDUCATION, TEACHER IDENTITY, WOMEN ACADEMICS, LEADERSHIP, CHALLENGES, CULTURE, IMPACT, US, UK	RAYYAN-INCLUSION: Kiran=>Included | RAYYAN-INCLUSION: Kiran=>Included	English
1,2,3	Journal Article	Moss SE,Mahmoudi M	STEM the bullying: An empirical investigation of abusive supervision in academic science	ECLINICALMEDICINE	2021	40				[Wake Forest Univ, Sch Business, Winston Salem, NC 27101 USA, Michigan State Univ, Dept Radiol, E Lansing, MI 48824 USA, Michigan State Univ, Precis Hlth Program, E Lansing, MI 48824 USA NR - 45 PU - ELSEVIER PI - AMSTERDAM PA - RADARWEG 29, 1043 NX AMSTERDAM, NETHERLANDS]	2021			Background: Academic bullying is a topic of significant interest of late, with high profile cases featured in scientific journals. Our aim is to document the nature and extent of academic bullying behaviors, examining who are the primary targets and perpetrators as well as the responses to and outcomes of bullying. Methods: We developed a cross-sectional global survey aimed primarily at those in …	Stem, Academic incivility, Bullying, Retaliation, Fair and unbiased investigation, PREDICTORS	RAYYAN-INCLUSION: Kiran=>Included | RAYYAN-INCLUSION: Kiran=>Included	English
1,2,3	Journal Article	Zappas M,Walton-Moss B,Sanchez C,Hildebr,JA,Kirkl,T	The Decolonization of Nursing Education	JNP-JOURNAL FOR NURSE PRACTITIONERS	2021	17	2	225-229		Univ Southern Calif, Dept Nursing, Los Angeles, CA 90007 USA NR - 22 PU - ELSEVIER SCIENCE INC PI - NEW YORK PA - STE 800, 230 PARK AVE, NEW YORK, NY 10169 USA	2021			In the era of COVID-19, coupled with a community in tune to Black lives, the call to action is now. It is now time to stop, listen, and be intentional in efforts to create sustainable policies and programs that shape the ability to deliver culturally competent care to diverse patients, families, professionals, and communities. Our recommendations for how faculty and academia can decolonize nursin…	diversity, nursing education, Education, Nursing, Education, Nursing	RAYYAN-INCLUSION: Kiran=>Included | RAYYAN-INCLUSION: Kiran=>Included	English
1,2,3	Journal Article	De Man J,Campbell L,Tabana H,Wouters E	The pandemic of online research in times of COVID-19	BMJ Open	2021	11	2		BMJ Publishing Group LTD	Department of Family Medicine and Population Health, University of Antwerp, Antwerp, Belgium ; Centre for Population, Family and Health, Department of Sociology, University of Antwerp, Antwerp, Belgium ; School of Public Health, Faculty of Community and Health, University of the Western Cape, Cape town, South Africa ; Centre for Population, Family and Health, Department of Sociology, University o…	2021		http://server.proxy-ub.rug.nl/login?url=https://www.proquest.com/scholarly-journals/pandemic-online-research-times-covid-19/docview/2492519221/se-2	The COVID-19 pandemic has led to an explosion of online research using rating scales. While this approach can be useful, two of the major challenges affecting the quality of this type of research include selection bias and the use of non-validated scales. Online research is prone to various forms of selection bias, including self-selection bias, non-response bias or only reaching specific subgrou…	Medical Sciences, COVID-19, statistics & research methods, social medicine, public health, mental health, psychiatry, Higher education, Validity, Distribution channels, Coronaviruses, Participation, Pandemics, Social networks, Sociodemographics, Questionnaires, Bias, Medical research	Copyright - © 2021 Author(s) (or their employer(s)) 2021. Re-use permitted under CC BY-NC. No commercial re-use. See rights and permissions. Published by BMJ. This is an open access article distributed in accordance with the Creative Commons Attribution Non Commercial (CC BY-NC 4.0) license, which permits others to distribute, remix, adapt, build upon this work non-commercially, and license their…	English
1,2,3	Journal Article	Cushman M	Goodbye 2020, hello to our future	Research and Practice in Thrombosis and Haemostasis	2021	5	1	6-8	John Wiley & Sons, Inc.	Department of Medicine, Larner College of Medicine at the University of Vermont, Burlington, VT, USA ; Department of Medicine, Larner College of Medicine at the University of Vermont, Burlington, VT, USA Hoboken	2021		http://server.proxy-ub.rug.nl/login?url=https://www.proquest.com/scholarly-journals/goodbye-2020-hello-our-future/docview/2482547257/se-2	The 300 000+ deaths from COVID‐19 in the United States (now) 1 provide stark illustration of the well‐known fact that despite great wealth, and that we spend more than any other country on health care when compared to other high‐income nations, for decades we have ranked near the bottom in several metrics of health starting from birth. 5 There are myriad reasons, including sexism, implicit bias, …	Medical Sciences, Cardiovascular Diseases, Authorship, Scientists, Thrombosis, Science, Pandemics, Gender, COVID-19, Medical research, United States, US	Copyright - © 2021. This work is published under http://creativecommons.org/licenses/by-nc-nd/4.0/ (the “License”). Notwithstanding the ProQuest Terms and Conditions, you may use this content in accordance with the terms of the License. Last updated - 2021-06-04 SubjectsTermNotLitGenreText - United States--US | RAYYAN-INCLUSION: Kiran=>Included | RAYYAN-INCLUSION: Kiran=>Included	English
1,2,3	Journal Article	Lewis C	Retrieving memories of dialogical knowledge production: COVID-19 and the global (re) awakening to systemic racism	The European Journal of Women's Studies	2020	27	4	413-419	Sage Publications Ltd.	Department of Sociology, Goldsmiths, UK ; Department of Sociology, Goldsmiths, UK London	2020	1350-5068	http://server.proxy-ub.rug.nl/login?url=https://www.proquest.com/scholarly-journals/retrieving-memories-dialogical-knowledge/docview/2447819268/se-2?accountid=11219	The origins of my approach to academic scholarship were established by my parents’ commitment to the revolutionary politics of social change and care. Though their perspectives differed in terms of their individual and structural analyses – whether through popular culture, the news, or reflections about the persistence of inequalities – dialogical interventions about the possibility of a more equ…	Women's Studies, COVID-19, Racism, Memories	Copyright - © The Author(s) 2020 Last updated - 2020-12-28 | RAYYAN-INCLUSION: Kiran=>Included | RAYYAN-INCLUSION: Kiran=>Included	English
1,2,3,4	Journal Article	Ryan M	Meeting the Moment	Portal: Libraries & the Academy	2021	21	4	1-8			10 2021	1531-2542	http://search.ebscohost.com.proxy-ub.rug.nl/login.aspx?direct=true&db=lxh&AN=153128392&site=ehost-live&scope=site	The article presents the discussion on cumulative effect of global pandemic, economic embattlement, and racial inequities. Topics include maintaining the publication schedule; advancing equity, diversity, inclusivity, and justice; and regardless of gender, race, religion, age, education, ethnicity, sexual orientation, ability status, and socioeconomic background.	Publishing, Serial publications, Database management, Authorship, Racism, Awards, Cultural pluralism, Social justice, Organizational goals	Accession Number: 153128392; Ryan, Marianne; Source Info: Oct2021, Vol. 21 Issue 4, p1; Thesaurus Term: Publishing; Thesaurus Term: Serial publications; Thesaurus Term: Database management; Thesaurus Term: Authorship; Subject Term: Racism; Subject Term: Awards; Subject Term: Cultural pluralism; Subject Term: Social justice; Subject Term: Organizational goals; Number of Pages: 8p; Document Type: A…
2,3	Journal Article	Davis CU,McCarthy-Brown N	Black women respond to a double pandemic: 'The emotional w(ait)eight'	Conversations across the field of dance studies. XL (2020): Decolonizing dance discourses	2020	40		10-12	[Society of Dance History Scholars, Society of Dance History Scholars]	Seattle	2020			The question was posed, how do we two Black women in academia navigate this moment? This polemic moment of political upheaval, this extended period of tragedy, grief, and mourning of so many people and so many things. But, in our response we are perplexed by the question. “When has this not been a component of our existence?”, we asked. Sadly, this is what we do—we carry on; we are all too famili…	87.8: Music and related disciplines, Social sciences. Ethnic and racial studies, 76: Music and other arts, Dance. General, 87.7: Music and related disciplines, Social sciences. Gender and sexuality studies, dance—general, dance studies as discipline, Black women scholars, relation to race and discrimination, Black studies, identity—collective, ethnic identity, Black women, dance studies, women's …	Accession Number: 2020-13192. Record Type: Main Record Document Type: Article in a periodical. Physical Medium: online; online. Pagination: 10-12. Language: English. Language of Summary: English. | RAYYAN-INCLUSION: Kiran=>Included | RAYYAN-INCLUSION: Kiran=>Included
2,3	Journal Article	Newswire PR	Celebrities And World Leaders From Government, Business & Academia Convene At UN Women's Global HeForShe Summit To Release Pioneering Solutions For Gender Equality	HE-FOR-SHE-Summit	2021				Y		5 2021		http://search.ebscohost.com.proxy-ub.rug.nl/login.aspx?direct=true&db=bwh&AN=202105271000PR.NEWS.USPR.DC91874&site=ehost-live&scope=site	; NEW YORK, May 27, 2021 /PRNewswire/ -- In the context of COVID-19 where gender inequalities have been exacerbated through a disproportional negative impact on millions of women and girls, HeForShe Champions convened at the virtual HeForShe Summit today to release their tried and tested methods that aim to accelerate positive progress. [ABSTRACT FROM PUBLISHER]	New York	Accession Number: 202105271000PR.NEWS.USPR.DC91874; Issue Information: ; Geographic Subject: New York; Geographic Subject: ; Document Type: Article; | RAYYAN-INCLUSION: Kiran=>Included | RAYYAN-INCLUSION: Kiran=>Included
2,3	Journal Article	Kitano M,Keswani S,Erdahl L,Bankhead-Kendall B,Wall A,Bilimoria K,Kim E	How to Optimize Your Research During a Pandemic – A Summary of Discussions From the Association for Academic Surgery Town Hall and Lessons Learned From 2020	Journal of Surgical Research	2021	268		244-252	Academic Press Inc.	[Division of Surgical Oncology and Endocrine Surgery, Department of Surgery, University of Texas Health San Antonio, San Antonio, TX, United States, Laboratory for Regenerative Tissue Repair, Division of Pediatric Surgery, Department of Surgery, Texas Children's Hospital and Baylor College of Medicine, Houston, Texas, Division of Surgical Oncology and Endocrine Surgery, Department of Surgery, Uni…	2021	0022-4804	https://www.scopus.com/inward/record.uri?eid=2-s2.0-85112321392&doi=10.1016%2fj.jss.2021.05.011&partnerID=40&md5=870e75bb7ef7479b53f194b6f4d6a8fe	The year 2020 was an unprecedented year for all of us, including for the academic surgery research community. Both stay-at-home and social distancing restrictions posed challenges to our personal and professional lives. The Association for Academic Surgery held its inaugural webinar-based panel discussion titled Association for Academic Surgery Town Hall with its topic on how to optimize research…	Academic research, Academic surgery, COVID-19, Pandemic, Research, Article, basic research, clinical trial (topic), coronavirus disease 2019, gender inequality, health services research, human, medical research, medical society, pandemic, productivity, research ethics, social distancing, translational research, webinar, Biomedical Research, Humans, Pandemics, Physical Distancing	Export Date: 28 February 2022 CODEN: JSGRA Correspondence Address: Kitano, M.; Department of Surgery, 7703 Floyd Curl Drive, United States; email: kitano@uthscsa.edu | RAYYAN-INCLUSION: Kiran=>Included | RAYYAN-INCLUSION: Kiran=>Included	English
2,3	Journal Article	Kearsley R	Unconscious gender bias in academic publications	Indian Journal of Ophthalmology	2021	69	6	1635-1636	Wolters Kluwer Medknow Publications	[Consultant Anaesthetist, Imperial College Healthcare NHS Trust, London, United Kingdom, Anaesthesia Reports]	2021	0301-4738	https://www.scopus.com/inward/record.uri?eid=2-s2.0-85106600250&doi=10.4103%2fijo.IJO_196_21&partnerID=40&md5=8e0e0f8ab9b9b388057dca36857c3555		ketamine, child, female, human, male, pandemic, regional anesthesia, sexism, Anesthesia, Conduction, Child, COVID-19, Female, Humans, Ketamine, Male, Pandemics, SARS-CoV-2, Sexism, Unconscious (Psychology), Bias (Epidemiology), Unconsciousness	Export Date: 28 February 2022 CODEN: IJOMB Correspondence Address: Kearsley, R.; Department of Anaesthesia, United Kingdom; email: rosemariekearsley@gmail.com | RAYYAN-INCLUSION: Kiran=>Included | RAYYAN-INCLUSION: Kiran=>Included	English
2,3	Journal Article	Shamseer L,Bourgeault I,Grunfeld E,Moore A,Peer N,Straus SE,Tricco AC	Will COVID-19 result in a giant step backwards for women in academic science?	Journal of Clinical Epidemiology	2021	134		160-166	Elsevier Inc.	[Knowledge Translation Program, Li Ka Shing Knowledge Institute, St. Michael's Hospital, Unity Health Toronto, 209 Victoria Street, East Building, Toronto, ON M5B 1W8, Canada, School of Sociology and Anthropology, University of Ottawa, 120 University Private, Social Sciences Building, Ottawa, ON K1N 6N5, Canada, Department of Family and Community Medicine, University of Toronto, 500 University Av…	2021	0895-4356	https://www.scopus.com/inward/record.uri?eid=2-s2.0-85102861614&doi=10.1016%2fj.jclinepi.2021.03.004&partnerID=40&md5=2946f13cf691c169516693cf8850e4da	COVID-19 has disproportionately placed women in academic science on the frontlines of domestic and clinical care compared to men. As a result, women in science are publishing less and potentially acquiring less funding during COVID-19 than compared to before. This widens the pre-existing gap between men and women in prevailing, publication-based measures of productivity used to determine academic…	Academic reward, COVID-19, Early career, Gender, Intersectionality, Productivity, Women, Article, career, clinical research, coronavirus disease 2019, female, funding, human, medical research, priority journal, scientific literature, adult, career mobility, epidemiology, pandemic, productivity, publishing, sex factor, Adult, Biomedical Research, Career Mobility, Efficiency, Female, Humans, Pandem…	Cited By :4 Export Date: 28 February 2022 CODEN: JCEPE Correspondence Address: Shamseer, L.; Knowledge Translation Program, 209 Victoria Street, East Building, Canada; email: Larissa.shamseer@unityhealth.to | RAYYAN-INCLUSION: Kiran=>Included | RAYYAN-INCLUSION: Kiran=>Included	English
2,3	Journal Article	Banks L,R,Hawa VK,Colella TJ,Dhanvantari S,Connelly KA,Robinson L,Mak S,Ouzounian M,Mulvagh SL,Straus S,Allan K,Yin Yip CY,Graham MM	Cardiovascular Physicians, Scientists, and Trainees Balancing Work and Caregiving Responsibilities in the COVID-19 Era: Sex and Race-Based Inequities	CJC Open	2021	3	5	627-630	Elsevier Inc.	[Cardiovascular Prevention and Rehabilitation Program, University Health Network, Toronto, ON, Canada, Faculty of Health Sciences, Ontario Tech University, Ontario, Canada, Department of Cardiovascular Medicine, Kaufman Center for Heart Failure, Heart, Vascular and Thoracic Institute, Cleveland Clinic, Cleveland, OH, United States, University of Toronto, Toronto, ON, Canada, Lawson Health Researc…	2021	2589-790X	https://www.scopus.com/inward/record.uri?eid=2-s2.0-85103924302&doi=10.1016%2fj.cjco.2020.12.027&partnerID=40&md5=823326a2dc840bb8059e5f0ddfe8dd3f	Background: The ongoing COVID-19 pandemic has exposed a work-life (im)balance that has been present but not openly discussed in medicine, surgery, and science for decades. The pandemic has exposed inequities in existing institutional structure and policies concerning clinical workload, research productivity, and/or teaching excellence inadvertently privileging those who do not have significant ca…	Article, Canadian, coronavirus disease 2019, gender bias, health care personnel, human, organizational policy, pandemic, physician, racism, responsibility, scientist, sex difference, student, work environment, work-life balance, workforce, workload, Socioeconomic Factors, Continental Population Groups	Export Date: 28 February 2022 Correspondence Address: Banks, L.; University Health Network, 347 Rumsey Rd, Canada; email: laura.banks@uhn.ca | RAYYAN-INCLUSION: Kiran=>Included | RAYYAN-INCLUSION: Kiran=>Included	English
2,3	Journal Article	Araújo E,Rentería LC,Silva M,Figueiredo S,E.t. P,C. C,Z. B	Time is flying: Discussing time in academia and science after covid-19	Proc. Int. Conf. Gend. Res.	2021			27-34	Academic Conferences and Publishing International Limited	[Universidade do Minho, Braga, Portugal, Universidad de Guadalajara, Mexico]	2021	2516-2810	https://www.scopus.com/inward/record.uri?eid=2-s2.0-85116358586&doi=10.34190%2fIGR.21.075&partnerID=40&md5=ce2a08b47334edabd090f8542d16a48d	This paper examines the advantages, difficulties and challenges of working from home with digital communication as perceived and experienced by junior women researchers during the COVID-19 pandemic. Two hypotheses are discussed: i) with the pandemics, higher education institutions and research centers may sponsor and support the intensification of working time at home, incorporating the increasin…	Academe, Covid-19, Gender, ICT-digital technologies of information and communication, Time	Export Date: 28 February 2022 | RAYYAN-INCLUSION: Kiran=>Included | RAYYAN-INCLUSION: Kiran=>Included	English
2,3	Journal Article	Soares R,Naegele R,Gouveia FO	Vertical segregation in chemistry during the covid-19 pandemic in brazil	Cadernos de Pesquisa	2021	51			Fundacao Carlos Chagas	[Instituto Estadual do Ambiente (Inea), Rio de Janeiro, Brazil, Phonema Assessoria Linguística, Brasília, Brazil]	2021	0100-1574	https://www.scopus.com/inward/record.uri?eid=2-s2.0-85111404303&doi=10.1590%2f198053147754&partnerID=40&md5=ef40aa55c08994ab8df41d8567393a4f	To date, no studies on gender identity have been identified that would single out any institution of excellence in the field of Chemistry in the context of the COVID-19 pandemic in Brazil. Although there is a gender gap, the Institute of Chemistry at the Federal University of Rio de Janeiro (IQ-UFRJ) has a high proportion of teachers compared to the national average in the area. However, several …	Career, Gender Relations, Science, Women, Brazil	Cited By :1 Export Date: 28 February 2022 | RAYYAN-INCLUSION: Kiran=>Included | RAYYAN-INCLUSION: Kiran=>Included	English
2,3	Journal Article	Woitowich NC,Jain S,Arora VM,Joffe H	COVID-19 threatens progress toward gender equity within academic medicine	Academic Medicine	2021			813-816	Lippincott Williams and Wilkins	[Women's Health Research Institute, Department of Obstetrics and Gynecology, Northwestern University Feinberg, School of Medicine, Chicago, IL, United States, Division of Hematology/Oncology, Rush University Medical Center, Chicago, IL, United States, University of Chicago, Pritzker School of Medicine, Chicago, IL, United States, Mary Horrigan Connors Center for Women's Health and Gender Biology,…	2021	1040-2446	https://www.scopus.com/inward/record.uri?eid=2-s2.0-85104478010&doi=10.1097%2fACM.0000000000003782&partnerID=40&md5=de2e36ee4367d2761e01d32564cd10d0	Women remain underrepresented within academic medicine despite past and present efforts to promote gender equity. The authors discuss how the COVID-19 pandemic could stymie progress toward gender parity within the biomedical workforce and limit the retention and advancement of women in science and medicine. Women faculty face distinct challenges as they navigate the impact of shelter-in-place and…	career mobility, diagnosis, economics, epidemiology, ethics, female, human, isolation and purification, leadership, male, medical school, medicine, mentor, pandemic, prevention and control, productivity, sexism, university hospital, virology, Academic Medical Centers, Career Mobility, COVID-19, Efficiency, Faculty, Medical, Female, Gender Equity, Humans, Leadership, Male, Medicine, Mentors, Pande…	Cited By :21 Export Date: 28 February 2022 CODEN: ACMEE Correspondence Address: Woitowich, N.C.; Women's Health Research Institute, 645N Michigan Ave., Suite 630, United States; email: nicole.woitowich@northwestern.edu | RAYYAN-INCLUSION: Kiran=>Included | RAYYAN-INCLUSION: Kiran=>Included	English
2,3	Journal Article	Brown KS,Farwell TM,Bender S,Martinez-Suarez AA,Boutelier S,Lambrechts AA,Leonowicz-Bukała I,Larasatie P	Part of Something Larger than Myself: Lessons Learned From a Multidisciplinary, Multicultural, and Multilingual International Research Team of Academic Women	International Journal of Qualitative Methods	2022			1-15			1 2022	1609-4069	http://search.ebscohost.com.proxy-ub.rug.nl/login.aspx?direct=true&db=aph&AN=154793824&site=ehost-live&scope=site	Bringing our collective experiences of past collaborations through a virtual connection, we created an international research team of 16 multidiscipline, multicultural, and multilingual academic women called COVID GAP (Gendered Academic Productivity) to explore the ongoing challenges and effects of COVID-19. Identifying as insider researchers, we engaged in a two-phase, primarily qualitative rese…	RESEARCH teams, WORK environment, UNIVERSITY research, COOPERATIVE research, COVID-19, academic women, authorship, collaboration, gender in higher education, qualitative inquiry, research collaboration, scholarship	Accession Number: 154793824; Brown, Kristina S. 1; Email Address: kbrown@adler.edu Farwell, Tricia M. 2 Bender, Sara 3 Martinez-Suarez, Alpha A. 4 Boutelier, Stefani 5 Lambrechts, Agata A. 6 Leonowicz-Bukała, Iwona 7 Larasatie, Pipiet 8; Affiliation: 1: Couple and Family Therapy Department, 32343 Adler University, Chicago, IL, USA 2: School of Journalism and Strategic Media, 5235 Middle Tennessee…
2,3	Journal Article	Woodhams C,Dacre J,Parnerkar I,Sharma M	Pay gaps in medicine and the impact of COVID-19 on doctors' careers	Lancet	2021	397	10269	79-80			1 2021	0140-6736	http://search.ebscohost.com.proxy-ub.rug.nl/login.aspx?direct=true&db=pbh&AN=148022799&site=ehost-live&scope=site	Gender equality and the gender pay gap in medicine have been long-standing problems globally.[1] Concerns about a large gender pay gap in medicine prompted the Department of Health and Social Care in England to commission an independent review, Mend the Gap: the Independent Review into Gender Pay Gaps in Medicine in England,[2] that has now been published and which we led. This review was underta…	WOMEN physicians, COVID-19, PHYSICIANS, MEDICAL personnel, GENDER wage gap, VOCATIONAL guidance	Accession Number: 148022799; Source Information: 1/9/2021, Vol. 397 Issue 10269, p79; Subject Term: WOMEN physicians; Subject Term: COVID-19; Subject Term: PHYSICIANS; Subject Term: MEDICAL personnel; Subject Term: GENDER wage gap; Subject Term: VOCATIONAL guidance; Subject Term: ; Number of Pages: 2p; ; Document Type: journal article; | RAYYAN-INCLUSION: Kiran=>Included | RAYYAN-INCLUSION: Kiran…
2,3	Journal Article	Lange B	Maintaining a gendered perspective in scientific meetings during the COVID-19 pandemic	The Lancet	2020	396	10266	1880	Lancet Publishing Group	[Department of Epidemiology, Helmholtz Centre for Infection Research, Braunschweig, 38124, Germany, German Center for Infection Research, Braunschweig, Germany]	2020	0140-6736	https://www.scopus.com/inward/record.uri?eid=2-s2.0-85097475339&doi=10.1016%2fS0140-6736%2820%2932512-5&partnerID=40&md5=aaf10532d3cbbc21abd9ad6c37fb4a25		consensus development, coronavirus disease 2019, disease exacerbation, disease transmission, gender bias, gender equity, health care organization, human, Letter, medical research, pandemic, priority journal, publication, publishing, Coronavirus infection, female, virus pneumonia, Coronavirus Infections, COVID-19, Female, Humans, Pandemics, Pneumonia, Viral, SARS-CoV-2	Cited By :1 Export Date: 28 February 2022 CODEN: LANCA | RAYYAN-INCLUSION: Kiran=>Included | RAYYAN-INCLUSION: Kiran=>Included	English
2,3	Journal Article		Minding the Gap: Organizational Strategies to Promote Gender Equity in Academic Medicine During the COVID-19 Pandemic	Journal of General Internal Medicine	2020	35	12	3681-3684	Springer	[Division of Hospital Medicine, Department of Medicine, University of California, San Francisco, CA, United States, Section of General Internal Medicine, Department of Medicine, Yale School of Medicine, New Haven, CT, United States, Department of Chronic Disease Epidemiology, Yale School of Public Health, New Haven, CT, United States, Division of General Internal Medicine, Department of Medicine,…	2020	0884-8734	https://www.scopus.com/inward/record.uri?eid=2-s2.0-85092220779&doi=10.1007%2fs11606-020-06269-0&partnerID=40&md5=e28656c35b64a2de56e6d950cefa073b		career, child care, clinical practice, clinical research, commercial phenomena, coronavirus disease 2019, curriculum, decision making, education, employee, evidence based practice, family support, financial stress, funding, gender equity, health care, health care cost, health care facility, health care personnel, health care policy, health insurance, health workforce, human, knowledge, leadership…	Cited By :9 Export Date: 28 February 2022 CODEN: JGIME Correspondence Address: Narayana, S.; Division of Hospital Medicine, United States; email: sirisha.narayana@ucsf.edu | RAYYAN-INCLUSION: Kiran=>Included | RAYYAN-INCLUSION: Kiran=>Included	English
2,3	Journal Article	Cardel MI,Dean N,Montoya-Williams D	Preventing a secondary epidemic of lost early career scientists effects of covid-19 pandemic on women with children	Annals of the American Thoracic Society	2020	17	11	1366-1370	American Thoracic Society	[Department of Health Outcomes and Biomedical Informatics, and Pediatrics, University of Florida College of Medicine, Gainesville, FL, United States, Department of Biostatistics, University of Florida College of Public Health and Health Professions, Gainesville, FL, United States, Department of Neonatology, Children's Hospital of Philadelphia, Philadelphia, PA, United States]	2020	2329-6933	https://www.scopus.com/inward/record.uri?eid=2-s2.0-85093884116&doi=10.1513%2fAnnalsATS.202006-589IP&partnerID=40&md5=bc2332f2f586ede521714e33cd10ee6c		academic success, Article, care behavior, career, child, child care, coronavirus disease 2019, demography, employment, epidemic, ethnic difference, family counseling, family planning, female, health care facility, health care policy, health care utilization, health equity, health workforce, human, infection prevention, needs assessment, pandemic, physician, publication, race difference, school, s…	Cited By :33 Export Date: 28 February 2022 Correspondence Address: Cardel, M.I.; Department of Health Outcomes and Biomedical Informatics and Pediatrics, 2004 Mowry Road, Suite 2247, P.O. Box 100177, United States; email: mcardel@ufl.edu | RAYYAN-INCLUSION: Kiran=>Included | RAYYAN-INCLUSION: Kiran=>Included	English
2,3	Journal Article	Kamran SC,Yerramilli D,Vapiwala N	No Talent Left Behind: A Silver Lining for Diversity in Radiation Oncology in the Post–Coronavirus Disease 2019 (COVID-19) Era	International Journal of Radiation Oncology Biology Physics	2020	108	2	472-474	Elsevier Inc.	[Department of Radiation Oncology, Massachusetts General Hospital, Harvard Medical School, Boston, MA, United States, Department of Radiation Oncology, Memorial Sloan Kettering Cancer Center, New York, NY, United States, Department of Radiation Oncology, Hospital of the University of Pennsylvania, Perelman School of Medicine, Philadelphia, PA, United States]	2020	0360-3016	https://www.scopus.com/inward/record.uri?eid=2-s2.0-85090022191&doi=10.1016%2fj.ijrobp.2020.05.055&partnerID=40&md5=d0124e4dd12b616e2fa7fb5829e4f0ec		silver, coronavirus disease 2019, creativity, doctor patient relationship, Editorial, ethnic group, gender identity, health care, health care disparity, human, lowest income group, medical student, patient compliance, physical capacity, priority journal, problem solving, productivity, radiation oncology, residency education, sexual orientation, socioeconomics, work engagement, workforce, Betacoro…	Cited By :1 Export Date: 28 February 2022 CODEN: IOBPD Correspondence Address: Kamran, S.C.; Department of Radiation Oncology, United States; email: skamran@mgh.harvard.edu | RAYYAN-INCLUSION: Kiran=>Included | RAYYAN-INCLUSION: Kiran=>Included	English
2,3	Journal Article	Kline-Fath BM,Victoria T	Revisiting gender workspace blind spots	Pediatric Radiology	2020	50	9	1311-1312	Springer	[Department of Radiology and Medical Imaging, Cincinnati Children’s Hospital Medical Center, 3333 Burnet Ave., Cincinnati, OH 45229, United States, Department of Radiology, University of Cincinnati College of Medicine, Cincinnati, OH, United States, Department of Radiology, Children’s Hospital of Philadelphia, Philadelphia, PA, United States]	2020	0301-0449	https://www.scopus.com/inward/record.uri?eid=2-s2.0-85087509658&doi=10.1007%2fs00247-020-04759-1&partnerID=40&md5=c8a44b1a43d2e4d56f12d77c0fe4bd6a		coronavirus disease 2019, cultural diversity, empowerment, gender, gender bias, human, leadership, Letter, medical society, priority journal, productivity, workplace, child, joint characteristics and functions, movement (physiology), Child, Humans, Movement, Range of Motion, Articular, Optic Disk	Cited By :1 Export Date: 28 February 2022 CODEN: PDRYA Correspondence Address: Kline-Fath, B.M.; Department of Radiology, United States; email: beth.kline-fath@cchmc.org | RAYYAN-INCLUSION: Kiran=>Included | RAYYAN-INCLUSION: Kiran=>Included	English
2,3	Journal Article	King KC,Hurst GD,Lewis Z	Let's emerge from the pandemic lockdown into a fairer academic world	Current Biology	2020	30	14	R799	Cell Press	[Department of Zoology, University of Oxford, Oxford, OX1 3SZ, United Kingdom, Institute of Infection, Veterinary and Ecological Sciences, University of Liverpool, Liverpool, L69 7ZB, United Kingdom, School of Life Sciences, University of Liverpool, Liverpool, L69 7ZB, United Kingdom]	2020	0960-9822	https://www.scopus.com/inward/record.uri?eid=2-s2.0-85087975425&doi=10.1016%2fj.cub.2020.06.034&partnerID=40&md5=aa8e126efe9ed20f66df0f305e67fab7	At the beginning of the pandemic, as universities were shutting, a meme did the rounds on social media. Some academics suggested that they were looking forward to increased productivity in grant and paper writing under lockdown. They cited the fact that Isaac Newton came up with his theory of gravity whilst quarantined during the bubonic plague. Globally, the reaction from many was to inwardly — …	academic success, female, human, male, pandemic, productivity, research, social media, university, Academic Success, COVID-19, Efficiency, Female, Humans, Male, Pandemics, Research, Social Media, Universities	Cited By :2 Export Date: 28 February 2022 CODEN: CUBLE | RAYYAN-INCLUSION: Kiran=>Included | RAYYAN-INCLUSION: Kiran=>Included	English
2,3	Journal Article	Codding RS,Collier-Meek M,Jimerson S,Klingbeil DA,Mayer MJ,Miller F	School psychology reflections on COVID-19, antiracism, and gender and racial disparities in publishing	School Psychology	2020	35	4	227-232	American Psychological Association Inc.	[Northeastern University, United States, University of Massachusetts Boston, United States, University of California, Santa Barbara, United States, University of Wisconsin-Madison, United States, Rutgers University, United States, University of Minnesota, United States]	2020	2578-4218	https://www.scopus.com/inward/record.uri?eid=2-s2.0-85088155468&doi=10.1037%2fspq0000399&partnerID=40&md5=639984c7d3dd308a7087339a30d58a64	School Psychology is an outlet for research on children, youth, educators, and families that has scientific, practice, and policy implications. The novel coronavirus 2019 (COVID-19) pandemic has significantly disrupted K-12 schooling as well as university training, impacting educational attainment and highlighting longstanding inequality. Furthermore, the killing of Breonna Taylor and George Floy…	Antiracism, COVID-19, Publishing disparities, academic success, adolescent, Betacoronavirus, child, Coronavirus infection, human, pandemic, prevention and control, psychology, publication, publishing, racism, sexism, virus pneumonia, Academic Success, Adolescent, Child, Coronavirus Infections, Editorial Policies, Humans, Pandemics, Periodicals as Topic, Pneumonia, Viral, Racism, Sexism, Self Psyc…	Cited By :7 Export Date: 28 February 2022 Correspondence Address: Codding, R.S.; Department of Applied Psychology, 360 Huntington Avenue, 404 International Village, United States; email: r.codding@northeastern.edu | RAYYAN-INCLUSION: Kiran=>Included | RAYYAN-INCLUSION: Kiran=>Included	English
2,3	Journal Article	Fletcher S,Joe MB,Hern,Ez S,Toman I,Harrison TG,Ruzycki SM	The Gender of COVID-19 Experts in Newspaper Articles: a Descriptive Cross-Sectional Study	JGIM: Journal of General Internal Medicine	2021	36	4	1011-1016			4 2021	0884-8734	http://search.ebscohost.com.proxy-ub.rug.nl/login.aspx?direct=true&db=aph&AN=149787479&site=ehost-live&scope=site	Background: Pre-existing gender-based disparities in academia may have worsened during the COVID-19 pandemic. Being cited as an expert source in newspaper articles about COVID-19 may increase an individual's research or leadership profile. In addition, visibility in a newspaper article is an important component of representation in academia. Objective: To determine whether women were underreprese…	COVID-19, COVID-19 pandemic, NEWSPAPERS, CROSS-sectional method, OCCUPATIONAL roles, expertise, gender-based disparities, Cross-Sectional Studies, Cesarean Section, Newspapers	Accession Number: 149787479; Fletcher, Sarah 1 Joe, Moss Bruton 2 Hernandez, Santanna 2 Toman, Inka 3 Harrison, Tyrone G. 4,5 Ruzycki, Shannon M. 4,5; Email Address: shannon.ruzycki@ucalgary.ca; Affiliation: 1: Faculty of Medicine, University of British Columbia, Vancouver, British Columbia, Canada 2: Cumming School of Medicine, University of Calgary, Calgary, Alberta, Canada 3: Department of Med…
2,3	Journal Article	Ayoko OB,Caputo A,Mendy J	Management research contributions to the COVID-19: a bibliometric literature review and analysis of the contributions from the Journal of Management & Organization	Journal of Management & Organization	2022			1-27	Cambridge University Press	Cambridge	2022		http://server.proxy-ub.rug.nl/login?url=https://www.proquest.com/reports/management-research-contributions-covid-19/docview/2618448747/se-2	In this respect, and to fulfill our aim in this study, we adopted a comparative bibliometrics analysis (Caputo, Pizzi, Pellegrini, & Dabić, Reference Caputo, Pizzi, Pellegrini and Dabić2021), an approach described as a part of scientometrics that complements different statistical methods to the study of scientific activities in a field of research (Bartolacci, Caputo, & Soverchia, Reference Barto…	Bibliometric, COVID-19, Journal of Management and Organization, literature review, VOSViewer, Bibliometrics	Copyright - © 2022. Notwithstanding the ProQuest Terms and conditions, you may use this content in accordance with the associated terms available at https://www.stm-assoc.org/about-the-industry/coronavirus-2019-ncov/. Last updated - 2022-01-17 | RAYYAN-INCLUSION: Kiran=>Included | RAYYAN-INCLUSION: Kiran=>Included	English
2,3	Journal Article	O'Dwyer M	Gender and Crises in European Economic Governance: Is this Time Different?	Journal of Common Market Studies	2022	60	1	152-169	Blackwell Publishing Ltd.	University of St Andrews, St Andrews, Scotland ; University of St Andrews, St Andrews, Scotland Oxford	2022	0021-9886	http://server.proxy-ub.rug.nl/login?url=https://www.proquest.com/scholarly-journals/gender-crises-european-economic-governance-is/docview/2619370056/se-2	There is now a significant literature engaging with questions around gender and economic governance in the European Union. This builds upon research that demonstrates the gendered nature of the economy, and the gendered impacts of policy interventions. This paper draws on that research to develop an account of the gendered nature of the EU's crisis response, moving from analysis of the response t…	Political Science, European economic governance, feminist political economy, crisis, gender, Feminist literature, COVID-19, Feminism, Economic crisis, Gender inequality, Equality, Gender, Pandemics, Governance, International finance	Copyright - © 2021. This article is published under http://creativecommons.org/licenses/by/4.0/ (the “License”). Notwithstanding the ProQuest Terms and Conditions, you may use this content in accordance with the terms of the License. Last updated - 2022-02-08 | RAYYAN-INCLUSION: Kiran=>Included | RAYYAN-INCLUSION: Kiran=>Included	English
2,3	Journal Article	Hipolito J,Shirai LT,Halinski R,Guidolin AS,Pini NDD,Pires CSS,Querino RB,Quintela ED,Fontes EMG	The Gender Gap in Brazilian Entomology: an Analysis of the Academic Scenario	NEOTROPICAL ENTOMOLOGY	2021	50	6	859-872		[Univ Fed Bahia, Inst Biol, Salvador, BA, Brazil, Inst Nacl de Pesquisas da Amazonia, Manaus, Amazonas, Brazil, Univ Estadual Campinas, Inst Biol, Campinas, SP, Brazil, Pontificia Univ Catolica Rio Grande do Sul, Escola Politecn, Porto Alegre, RS, Brazil, Univ Sao Paulo, Escola Super Agr Luiz de Queiroz, Piracicaba, SP, Brazil, Embrapa Agroind Trop, Fortaleza, Ceara, Brazil, Embrapa Recursos Gene…	2021			Although women are about half of world's population, they are underrepresented in many sectors including academia and the research scenario in general. Gender gap in Entomology has been pointed out in other publications; however, data for Brazil has never been demonstrated. Here we provide a diagnosis for the Brazilian Entomology scenario in order to contribute to propositions towards disentangli…	Insects, Scissor effect, Leaky pipeline, Sucupira, Lattes, WOMEN, DIVERSITY, BIODIVERSITY, SCIENTISTS, INEQUALITY, ATTRITION, PIPELINE, SCIENCE, US	RAYYAN-INCLUSION: Kiran=>Included | RAYYAN-INCLUSION: Kiran=>Included	English
2,3	Journal Article	Schneider AK	Research Handbook on Gender and Negotiation	Negotiation Journal	2021	37	4	529-538	Blackwell Publishing Ltd.	Oxford	2021	0748-4526	http://server.proxy-ub.rug.nl/login?url=https://www.proquest.com/scholarly-journals/research-handbook-on-gender-negotiation/docview/2618171098/se-2?accountid=11219	Schneider reviews Research Handbook on Gender and Negotiation edited by Mara Olekalns and Jessica A. Kennedy.	Political Science, International Relations, Handbooks, Research, Gender differences, Negotiation, Rhetoric, Peer relationships, Collaboration, Socialization, Flexible hours, Communication, Work life balance, Books, Pandemics, Girls, Females, Negotiations, Gender, Women, Friendship, Caregivers, Males, Nonfiction	Name - Marquette University Copyright - Copyright Blackwell Publishing Ltd. Fall 2021 Last updated - 2022-01-18 | RAYYAN-INCLUSION: Kiran=>Included | RAYYAN-INCLUSION: Kiran=>Included	English
2,3	Journal Article	Jeffers AE	The COVID-19 Pandemic is Widening the Gap for Women in STEM	COMPUTING IN SCIENCE & ENGINEERING	2021	23	3	96-98		Univ Michigan, Ann Arbor, MI 48109 USA NR - 8 PU - IEEE COMPUTER SOC PI - LOS ALAMITOS PA - 10662 LOS VAQUEROS CIRCLE, PO BOX 3014, LOS ALAMITOS, CA 90720-1314 USA	2021				COVID-19, Productivity, Pandemics, Sociology, Mentoring, Statistics	RAYYAN-INCLUSION: Kiran=>Included | RAYYAN-INCLUSION: Kiran=>Included	English
2,3	Journal Article	Schmidt EK	Rethinking research funding in pandemic times	Gender, Work and Organization	2021	28		415-418	Blackwell Publishing Ltd.	Department of Political Science, Aarhus University, Danish Centre for Studies in Research and Research Policy, Aarhus, Denmark ; Department of Political Science, Aarhus University, Danish Centre for Studies in Research and Research Policy, Aarhus, Denmark Oxford	2021	0968-6673	http://server.proxy-ub.rug.nl/login?url=https://www.proquest.com/scholarly-journals/rethinking-research-funding-pandemic-times/docview/2553407158/se-2?accountid=11219	Experiences from individualized gender equality funding programs, as the ones used in Denmark, demonstrate that one‐off policy interventions, although a small step in the right direction, cannot stand alone in the fight against gender imbalances in academia. Closing the gender gap is a complex, multi‐level undertaking that needs constant rethinking of policies and the dedication of adequate finan…	Business And Economics, Management, gender imbalances, institutional change, pandemic, research funding policies and strategies, Productivity, Funding, Gender equity, Research, COVID-19, Pandemics, Funds, Women, Research funding, Individualized, Equality, Cultural change, Gender inequality	Copyright - © 2021 John Wiley & Sons Ltd. Last updated - 2022-02-10 | RAYYAN-INCLUSION: Kiran=>Included | RAYYAN-INCLUSION: Kiran=>Included	English
2,3	Journal Article	Akers KG,Pionke JJ,Aaronson Ellen M A,Chambers T,Cyrus JW,Eldermire ER,Norton MJ	Racial, gender, sexual, and disability identities of the Journal of the Medical Library Association's editorial board, reviewers, and authors	Journal of the Medical Library Association	2021	109	2	167-173	University Library System, University of Pittsburgh	Chicago	2021	1536-5050	http://server.proxy-ub.rug.nl/login?url=https://www.proquest.com/scholarly-journals/racial-gender-sexual-disability-identities/docview/2560404579/se-2	The Journal of the Medical Library Association (JMLA) recently issued a call for submissions that recognize and address social injustices; speak to diversity, equity, and inclusion in our workforce and among our user populations; and share critical perspectives on health sciences librarianship as well as those on any topic within JMLA's scope written by authors who are Black, Indigenous, or Peopl…	Library And Information Sciences, Editorials, Polls & surveys, Peer review, Journals, Minority & ethnic groups, Demographics, Manuscripts, Response rates, Medical libraries, Social exclusion, Racial identity, Health sciences, Multiculturalism & pluralism, Scholarly publishing, Disability, Scholarly communication, Gender identity, Library associations, COVID-19, Journalism, Medical, Journalism, Me…	Name - Medical Library Association Copyright - © 2021. This work is published under https://creativecommons.org/licenses/by/4.0/ (the “License”). Notwithstanding the ProQuest Terms and Conditions, you may use this content in accordance with the terms of the License. Last updated - 2021-08-12 | RAYYAN-INCLUSION: Kiran=>Included | RAYYAN-INCLUSION: Kiran=>Included	English
2,3	Journal Article	Labib K,Evans N	Gender, diversity, and the responsible assessment of researchers	PLoS Biology	2021	19	4		Public Library of Science	San Francisco	2021	1544-9173	http://server.proxy-ub.rug.nl/login?url=https://www.proquest.com/scholarly-journals/gender-diversity-responsible-assessment/docview/2528202938/se-2	When the research knowledge base is biased in terms of gender or other types of diversity, as is the case with these examples, the trustworthiness of the research itself and its benefit for society are undermined, as it becomes questionable whether the research has employed the right questions and methods to elicit relevant findings for society. [...]inclusion of diverse perspectives should not j…	Biology, Research integrity, Research assessment, COVID 19, Peer review, Science policy, Research and analysis methods, Research quality assessment, United States, Research facilities, Multiculturalism & pluralism, Gender, Knowledge bases (artificial intelligence), Coronaviruses, Human resources, Research institutions, COVID-19, Medical research, Netherlands, Hong Kong	Name - Vrije Universiteit Amsterdam Copyright - © 2021 Labib, Evans. This is an open access article distributed under the terms of the Creative Commons Attribution License: http://creativecommons.org/licenses/by/4.0/ (the “License”), which permits unrestricted use, distribution, and reproduction in any medium, provided the original author and source are credited. Notwithstanding the ProQuest Term…	English
2,3	Journal Article		How PLOS Biology aims to foster diversity, equity and inclusion in science	PLoS Biology	2021	19	3		Public Library of Science	San Francisco	2021	1544-9173	http://server.proxy-ub.rug.nl/login?url=https://www.proquest.com/scholarly-journals/how-i-plos-biology-aims-foster-diversity-equity/docview/2513696155/se-2	The process for tracking diversity is not straightforward because privacy regulations, which differ between countries, can affect how race, ethnicity, and gender data are collected and stored. In October, PLOS announced a new name change policy across the portfolio to honor those requests in order to prevent stigmatization and ensure that “the name on the paper reflects who authors are.” [...]the…	Biology, Racial discrimination, Scientists, COVID 19, Careers, Ethnicities, Mothers, Pandemics, Scientific publishing, Homogeneity, Minority & ethnic groups, Multiculturalism & pluralism, Racism, Coronaviruses, COVID-19, United States, US, Foster Home Care	Name - Public Library of Science Copyright - © 2021 The PLOS Biology Staff Editors. This is an open access article distributed under the terms of the Creative Commons Attribution License: http://creativecommons.org/licenses/by/4.0/ (the “License”), which permits unrestricted use, distribution, and reproduction in any medium, provided the original author and source are credited. Notwithstanding th…	English
2,3	Journal Article	Calaza KC,Erthal FCS,Pereira MG,Macario KCD,Daflon VT,David IPA,Castro HC,Vargas MD,Martins LB,Stariolo JB,Volchan E,de Oliveira L	Facing Racism and Sexism in Science by Fighting Against Social Implicit Bias: A Latina and Black Woman's Perspective	FRONTIERS IN PSYCHOLOGY	2021	12				[Univ Fed Fluminense, Inst Biol, Dept Neurobiol, Niteroi, RJ, Brazil, Univ Fed Rio de Janeiro, Inst Biofis Carlos Chagas Filho, Neurobiol Lab, Rio De Janeiro, Brazil, Univ Fed Fluminense, Inst Biomed, Dept Physiol & Pharmacol, Niteroi, RJ, Brazil, Univ Fed Fluminense, Inst Phys, Dept Phys, Niteroi, RJ, Brazil, Univ Fed Fluminense, Inst Human Sci & Philosophy, Dept Sociol & Methodol Social Sci, Ni…	2021			The editors of several major journals have recently asserted the importance of combating racism and sexism in science. This is especially relevant now, as the COVID-19 pandemic may have led to a widening of the gender and racial/ethnicity gaps. Implicit bias is a crucial component in this fight. Negative stereotypes that are socially constructed in a given culture are frequently associated with i…	implicit bias, stereotype threat, gender inequalities, diversity, underrepresented groups, STEREOTYPE THREAT, GENDER STEREOTYPES, SELF-ESTEEM, PERFORMANCE, DIVERSITY, ATTITUDES, HEALTH, SUCCESS, REPRESENTATIONS, PREDICTIONS, Hispanic Americans, Bias (Epidemiology), Racism	RAYYAN-INCLUSION: Kiran=>Included | RAYYAN-INCLUSION: Kiran=>Included	English
2,3	Journal Article	Paradis KC,Ryan KA,Schmid S,Moran JM,Laucis AM,Chapman CH,Bott-Kothari T,Prisci,Aro JI,Simiele SJ,Balter JM,Matuszak MM,Narayana V,Jagsi R	Gender Differences in Work-Life Integration Among Medical Physicists	ADVANCES IN RADIATION ONCOLOGY	2021	6	5			[Michigan Med, Dept Radiat Oncol, Ann Arbor, MI 48109 USA, Univ Michigan, Ctr Bioeth & Social Sci Med, Ann Arbor, MI 48109 USA, Univ Texas MD Anderson Canc Ctr, Div Radiat Oncol, Houston, TX 77030 USA FU - Michigan Medicine Department of Radiation Oncology; University of Michigan Center for Bioethics and Social Sciences in Medicine FX - We gratefully acknowledge the Michigan Medicine Department o…	2021			Purpose: To generate an understanding of the primary concerns facing medical physicists regarding integration of a demanding technical career with their personal lives. Methods and Materials: In 2019, we recruited 32 medical physics residents, faculty, and staff via emails to US medical physics residency program directors to participate in a 1-hour, semistructured interview that elicited their th…	QUALITATIVE RESEARCH, FACULTY RESEARCHERS, RADIATION ONCOLOGY, USERS GUIDES, HEALTH-CARE, NARRATIVES, BURNOUT, BALANCE, XXIII	RAYYAN-INCLUSION: Kiran=>Included | RAYYAN-INCLUSION: Kiran=>Included	English
2,3	Journal Article	Taufiq-Hail GA,Sarea A,Hawaldar IT	The Impact of Self-Efficacy on Feelings and Task Performance of Academic and Teaching Staff in Bahrain during COVID-19: Analysis by SEM and ANN	Journal of Open Innovation : Technology, Market, and Complexity	2021	7	4	224	MDPI AG	Institute for Advanced and Smart Digital Opportunities (IASDO), School of Computing (SOC), University Utara Malaysia (UUM), Sintok 06010, Malaysia; College of Business (COB), University of Buraimi (UOB), Al Buraimi Governorate 890, Oman ; College of Business and Finance, Ahlia University, Manama 10878, Bahrain; Adelsarea@yahoo.com ; Department of Accounting & Finance, College of Business Administ…	2021		http://server.proxy-ub.rug.nl/login?url=https://www.proquest.com/scholarly-journals/impact-self-efficacy-on-feelings-task-performance/docview/2612789126/se-2	COVID-19 has changed the way we live, communicate and work, as well as altering our feelings. The higher education sector, alongside other sectors, has been severely affected by the pandemic and its serious repercussions. Academic and teaching staff have had to work from home and convert to online teaching, a change which has been met with both negative and positive feelings. The need for new com…	Business And Economics, artificial neural network, Bahrain, COVID-19, higher education, negative feelings, positive feelings, self-efficacy, task performance, Gender differences, Teaching, Innovations, Students, Fear & phobias, Happiness, Computer assisted instruction, CAI, Multilayers, Academic achievement, Network reliability, Education, Artificial neural networks, Pandemics, Telecommuting, Med…	Copyright - © 2021 by the authors. Licensee MDPI, Basel, Switzerland. This article is an open access article distributed under the terms and conditions of the Creative Commons Attribution (CC BY) license (https://creativecommons.org/licenses/by/4.0/). Notwithstanding the ProQuest Terms and Conditions, you may use this content in accordance with the terms of the License. Last updated - 2021-12-23 …	English
2,3	Journal Article	Eizmendi M,Peña-Fernández S	Fewer and Later: Women as Experts in TED Talks about COVID-19	Journalism and Media	2021	2	4	808	MDPI AG	Basel	2021		http://server.proxy-ub.rug.nl/login?url=https://www.proquest.com/scholarly-journals/fewer-later-women-as-experts-ted-talks-about/docview/2612784312/se-2	The dissemination of science has undergone a major upsurge in recent years thanks to the Internet, which has served to overcome many of the technical and economic barriers. Among the many initiatives, one of the most successful tools has been the TED Talks website. At the same time, various studies indicate that women produce less science dissemination content and that they are also more likely t…	Sociology, TED Talk, gender, COVID-19, dissemination, science, engagement, Men, Qualitative research, Experts, Internet, Audiences, Video recordings, Content analysis, Pandemics, Gender, Society, Social networks, Dissemination, Gender differences, Authorship, Comments, Women, Coronaviruses	Copyright - © 2021 by the authors. Licensee MDPI, Basel, Switzerland. This article is an open access article distributed under the terms and conditions of the Creative Commons Attribution (CC BY) license (https://creativecommons.org/licenses/by/4.0/). Notwithstanding the ProQuest Terms and Conditions, you may use this content in accordance with the terms of the License. Last updated - 2021-12-23 …	English
2,3	Journal Article	Hosseini M,Sharifzad S	Gender disparity in publication records: a qualitative study of women researchers in computing and engineering	Research Integrity and Peer Review	2021	6		1-14	BioMed Central	London	2021		http://server.proxy-ub.rug.nl/login?url=https://www.proquest.com/scholarly-journals/gender-disparity-publication-records-qualitative/docview/2604764692/se-2	Background The current paper follows up on the results of an exploratory quantitative analysis that compared the publication and citation records of men and women researchers affiliated with the Faculty of Computing and Engineering at Dublin City University (DCU) in Ireland. Quantitative analysis of publications between 2013 and 2018 showed that women researchers had fewer publications, received …	Medical Sciences, Gender disparity, Equity, STEM, Authorship, Qualitative research, Higher education, Careers, Schools, Gender equity, Questionnaires, Quantitative analysis, Researchers, Equality, Engineering, Women, Sex discrimination, Interviews, Career development planning, COVID-19, Ireland	Copyright - © 2021. This work is licensed under http://creativecommons.org/licenses/by/4.0/ (the “License”). Notwithstanding the ProQuest Terms and Conditions, you may use this content in accordance with the terms of the License. Last updated - 2021-12-01 SubjectsTermNotLitGenreText - Ireland | RAYYAN-INCLUSION: Kiran=>Included | RAYYAN-INCLUSION: Kiran=>Included	English
2,3	Journal Article	Khan T,Siriwardhane P	Barriers to Career Progression in the Higher Education Sector: Perceptions of Australian Academics	SUSTAINABILITY	2021	13	11			RMIT Univ, Coll Business & Law, Sch Accounting Informat Syst & Supply Chain, Melbourne, Vic 3000, Australia FU - Governance, Accountability and Law (GAL) Research Strategic Priority Area, College of Business and Law, RMIT University FX - The research was partially funded by Governance, Accountability and Law (GAL) Research Strategic Priority Area, College of Business and Law, RMIT University. NR …	2021			There are multiple factors that can potentially impact the career progression of academics to professoriate level (referred to as levels D and E in Australia). This research provides a detailed understanding of critical factors (by gender) that negatively influence career progressions. Perceptions of factors that influence career progressions have been found to be more pronounced amongst female a…	academic career progression, higher education sector, STEMM, business, COVID-19, GENDER-DIFFERENCES, WOMEN, PRODUCTIVITY, WORK	RAYYAN-INCLUSION: Kiran=>Included | RAYYAN-INCLUSION: Kiran=>Included	English
2,3	Journal Article	Liu X,Dunlop R,Allavena R	Women Representation and Gender Equality in Different Academic Levels in Veterinary Science	Veterinary Sciences	2021	8	8	159	MDPI AG	Basel	2021		http://server.proxy-ub.rug.nl/login?url=https://www.proquest.com/scholarly-journals/women-representation-gender-equality-different/docview/2565713861/se-2	Women’s participation and completion at veterinary schools has increased globally for the past few decades. However, increased female graduates have not translated into similar patterns of academic staffing. The gender distribution within each academic level at eight accredited veterinary faculties in Australia and New Zealand, 38 accredited faculties in the USA and Canada and 98 accredited facul…	Veterinary Science, gender equality, academia, veterinary science, Author productivity, College professors, Science, Gender, Gender equity, Accreditation, STEM education, Equality, Data collection, Academic careers, Colleges & universities, Females, Women, Sex discrimination, Males, Career advancement, COVID-19, Bias, New Zealand, Canada, United States, US, Europe, Australia	Copyright - © 2021 by the authors. Licensee MDPI, Basel, Switzerland. This article is an open access article distributed under the terms and conditions of the Creative Commons Attribution (CC BY) license (https://creativecommons.org/licenses/by/4.0/). Notwithstanding the ProQuest Terms and Conditions, you may use this content in accordance with the terms of the License. Last updated - 2021-08-28 …	English
2,3	Journal Article	Slobodian V,Soares KD,Falaschi RL,Prado LR,Camelier P,Guedes TB,Leal LC,Hsiou AS,Del-Rio G,Costa ER,Pereira KR,D'Angiolella AB,de A Sousa S,Diele-Viegas LM	Why we shouldn’t blame women for gender disparity in academia: perspectives of women in zoology	Zoologia	2021	38			Sociedade Brasileira de Zoologia	Curitiba	2021	1984-4670	http://server.proxy-ub.rug.nl/login?url=https://www.proquest.com/scholarly-journals/why-we-shouldn-t-blame-women-gender-disparity/docview/2507564018/se-2	S1984-46702021000100101http://www.scielo.br/scielo.php?script=sci_arttext%26pid=S1984-46702021000100101%26lng=en%26nrm=iso%26tlng=enS1984-46702021000100101http://www.scielo.br/scielo.php?script=sci_arttext%26pid=S1984-46702021000100101%26lng=en%26nrm=iso%26tlng=enS1984-46702021000100101http://www.scielo.br/scielo.php?script=sci_arttext%26pid=S1984-46702021000100101%26lng=en%26nrm=iso%26tlng=en Se…	Biology, Zoology, Academic settings, diversity, gender gap, gendered metrics, STEM, women in science, Research, Scientists, Psychology, Collaboration, Careers, Mentors, Success, Biodiversity, Gender, STEM education, Curricula, Women, Co authorship, Museums, Zoologists, Colleges & universities, Ichthyologists, COVID-19, Electronic mail, Females, Marine invertebrates, Men, Publications, Collections…	Copyright - © 2021. This work is published under https://creativecommons.org/licenses/by/4.0/deed.en (the “License”). Notwithstanding the ProQuest Terms and Conditions, you may use this content in accordance with the terms of the License. Last updated - 2021-04-01 SubjectsTermNotLitGenreText - Brazil | RAYYAN-INCLUSION: Kiran=>Included | RAYYAN-INCLUSION: Kiran=>Included	English
2,3	Journal Article		Variability Matters	International Journal of Environmental Research and Public Health	2021	18	1	157	MDPI AG	Basel	2021	1661-7827	http://server.proxy-ub.rug.nl/login?url=https://www.proquest.com/scholarly-journals/variability-matters/docview/2474565618/se-2	Much of science, including public health research, focuses on means (averages). The purpose of the present paper is to reinforce the idea that variability matters just as well. At the hand of four examples, we highlight four classes of situations where the conclusion drawn on the basis of the mean alone is qualitatively altered when variability is also considered. We suggest that some of the more…	Sciences: Comprehensive Works, inequality, statistical inference, forecasting, lifespan, socioeconomic status, academic performance, Prescriptions, Gender differences, Standard deviation, Socioeconomic factors, Public health, Random variables, Life expectancy, Age, Trends, Hypotheses, Normal distribution, Fathers, Variability, Coronaviruses, Retirement, Males, COVID-19, Denmark	Copyright - © 2021. This work is licensed under http://creativecommons.org/licenses/by/3.0/ (the “License”). Notwithstanding the ProQuest Terms and Conditions, you may use this content in accordance with the terms of the License. Last updated - 2021-01-02 SubjectsTermNotLitGenreText - Denmark | RAYYAN-INCLUSION: Kiran=>Included | RAYYAN-INCLUSION: Kiran=>Included	English
2,3	Journal Article	Minello A,Ra	The pandemic and the female academic	Nature	2020				Springer Nature B.V.	Dordrecht	2020		http://server.proxy-ub.rug.nl/login?url=https://www.proquest.com/scholarly-journals/pandemic-female-academic/docview/2407606120/se-2	Academic work — in which career advancement is based on the number and quality of a person’s scientific publications, and their ability to obtain funding for research projects — is basically incompatible with tending to children. Overall, the COVID-19 experience is changing the way research is done, especially in some sectors: the new mechanisms of accelerated peer review, the increased quantity …	Pandemics	Copyright - © 2020. Notwithstanding the ProQuest Terms and Conditions, you may use this content in accordance with the associated terms available at https://www.springernature.com/gp/researchers/campaigns/coronavirus Last updated - 2020-12-22 | RAYYAN-INCLUSION: Kiran=>Included | RAYYAN-INCLUSION: Kiran=>Included	English
2,3,4	Journal Article	Esfahani SA,Lee A,Hu JY,Kelly M,Magudia K,Everett C,Szabunio M,Ackerman S,Spalluto LB	Challenges faced by women in radiology during the pandemic - A summary of the AAWR Women's Caucus at the ACR 2020 annual meeting	Clinical Imaging	2020	68		291-294	Elsevier Inc.	[Department of Radiology, Massachusetts General Hospital, Harvard Medical School, Boston, MA, United States, Department of Radiation Oncology, Memorial Sloan Kettering Cancer Center, New York, NY, United States, Department of Internal Medicine, University of Maryland Medical Center, Baltimore, MD, United States, Department of Radiation Oncology, VA New Jersey Health Care System, East Orange, NJ, …	2020	0899-7071	https://www.scopus.com/inward/record.uri?eid=2-s2.0-85091220412&doi=10.1016%2fj.clinimag.2020.08.016&partnerID=40&md5=24456f440fc364202007d46330547049	The COVID-19 pandemic has dramatically altered the professional and personal lives of radiologists and radiation oncologists. This article summarizes the 2020 American Association for Women in Radiology (AAWR) Women's Caucus at the American College of Radiology (ACR) Annual Meeting. The caucus focused on the major challenges that women in radiology have faced during the pandemic. © 2020	COVID-19, Gender equity, Pandemic, Women in radiology, clinical practice, coronavirus disease 2019, diagnostic imaging, Editorial, female, gender disparity, gender equity, graduating medical education, health care policy, human, leadership, medical education, pandemic, practice guideline, priority journal, productivity, radiation oncologist, radiologist, radiology, social discrimination, social s…	Cited By :6 Export Date: 28 February 2022 CODEN: CLIME Correspondence Address: Spalluto, L.B.; Department of Radiology and Radiological Sciences, 1161 21st Ave South, United States; email: lucy.b.spalluto@vumc.org | RAYYAN-INCLUSION: Kiran=>Included | RAYYAN-INCLUSION: Kiran=>Included	English
Included	Journal Article	Davis JC,Li EP,Butterfield MS,DiLabio GA,Sangunthanam N,Marcolin B	Are we failing female and racialized academics? A canadian national survey examining the impacts of the covid‐19 pandemic on tenure and tenure‐track faculty	Gender, Work and Organization	2022				Wiley-Blackwell Publishing Ltd.		2 2022			The novel coronavirus 2019 (COVID‐19) pandemic caused the abrupt curtailment of on‐campus research activities that amplified impacts experienced by female and racialized faculty. In this mixed‐method study, we systematically and strategically unpack the impact of the shift of academic work environments to remote settings on tenured and tenure‐track faculty in Canada. Our quantitative analysis dem…	COVID‐19, health, research, social, tenured and tenure‐track faculty, university, well‐being, No terms assigned	Accession Number: 2022-35929-001. Partial author list: First Author & Affiliation: Davis, Jennifer C. Other Publishers: Blackwell Publishing. Release Date: 20220224. Publication Type: Journal (0100), Peer Reviewed Journal (0110). Format Covered: Electronic. Language: EnglishMajor Descriptor: No terms assigned. Classification: Industrial & Organizational Psychology (3600). Publication History: Acc…
Included	Journal Article	Anabaraonye N,Tsai CJ,Saeed H,Chino F,Ekpo E,Ahuja S,Garcia O,Miller RC	Impact of the Early COVID-19 Pandemic on Gender Participation in Academic Publishing in Radiation Oncology	Advances in Radiation Oncology	2022	7	2		Elsevier Inc.	[University of Pennsylvania, Philadelphia, Pennsylvania, Department of Radiation Oncology, Memorial Sloan Kettering Cancer Center, New York, New York, Department of Radiation Oncology, Medical College of Wisconsin, Milwaukee, WI, United States, Department of Radiation Oncology, Memorial Sloan Kettering Cancer Center, New York, New York, Johns Hopkins University, Baltimore, Maryland, University of…	2022	2452-1094	https://www.scopus.com/inward/record.uri?eid=2-s2.0-85123852267&doi=10.1016%2fj.adro.2021.100845&partnerID=40&md5=861658bfbc84ea04aaee91066c2cc096	Purpose: There is a known gender gap in oncology publishing with worse disparities within specialty fields such as radiation oncology. There has been a significant increase in the number of articles submitted to academic journals during the pandemic. Several analyses have suggested that the pandemic has had a disproportionate effect on academic productivity of women in academia, as measured by ar…		Export Date: 28 February 2022 Correspondence Address: Miller, R.C.; Division of Radiation Oncology, United States; email: RCMiller@utmck.edu | RAYYAN-INCLUSION: Kiran=>Included | RAYYAN-INCLUSION: Kiran=>Included	English
Included	Journal Article	Jemielniak D,Sławska A,Wilamowski M	COVID-19 effect on the gender gap in academic publishing	Journal of Information Science	2022			1			2 2022	0165-5515	http://search.ebscohost.com.proxy-ub.rug.nl/login.aspx?direct=true&db=aph&AN=155176805&site=ehost-live&scope=site	The authors wanted to verify a popular belief that women scholars have been disproportionately affected by the COVID-19 pandemic. We studied the first names of authors of 266,409 articles from 2813 journals in 21 disciplines, and we found no significant differences between men and women in publication patterns between 2021, 2020, and 2019 overall. However, we found significant differences in publ…	bibliometrics, COVID-19, gender differences, publication counts, publication patterns	Accession Number: 155176805; Jemielniak, Dariusz 1; Email Address: djemielniak@cyber.harvard.edu Sławska, Agnieszka 1 Wilamowski, Maciej; Affiliation: 1: Kozminski University, Poland; Source Info: Feb2022, p1; Author-Supplied Keyword: bibliometrics; Author-Supplied Keyword: COVID-19; Author-Supplied Keyword: gender differences; Author-Supplied Keyword: publication counts; Author-Supplied Keyword:…
Included	Journal Article	Andersen JP,Nielsen MW,Simone NL,Lewiss RE,Jagsi R	COVID-19 medical papers have fewer women first authors than expected	eLife	2020			1-7			6 2020	2050-084X	http://search.ebscohost.com.proxy-ub.rug.nl/login.aspx?direct=true&db=aph&AN=145380084&site=ehost-live&scope=site	The COVID-19 pandemic has resulted in school closures and distancing requirements that have disrupted both work and family life for many. Concerns exist that these disruptions caused by the pandemic may not have influenced men and women researchers equally. Many medical journals have published papers on the pandemic, which were generated by researchers facing the challenges of these disruptions. …	WOMEN authors, COVID-19, COVID-19 pandemic, SCHOOL closings, FAMILIES, ELECTRONIC journals, UNITED States	Accession Number: 145380084; ANDERSEN, JENS PETER 1 NIELSEN, MATHIAS WULLUM 1 SIMONE, NICOLE L. 2 LEWISS, RESA E. 2 JAGSI, RESHMA 3; Email Address: rjagsi@med.umich.edu; Affiliation: 1: Conceptualization, Data curation, Software, Formal analysis, Validation, Investigation, Visualization, Methodology, Writing - original draf 2: Investigation, Methodology, Writing - original draft, Writing - review…
Included	Journal Article	Gayet-Ageron A,Ben Messaoud K,Richards M,Schroter S	Female authorship of covid-19 research in manuscripts submitted to 11 biomedical journals: cross sectional study	BMJ (Clinical research ed. )	2021	375		n2288	British Medical Association	[Division of Clinical Epidemiology, University Hospitals of Geneva, Geneva, Switzerland.; Department of Health and Community Medicine, University of Geneva, Geneva, Switzerland.; Contributed equally., Department of Health and Community Medicine, University of Geneva, Geneva, Switzerland.; Contributed equally., Article Transfer Service, BMJ Publishing Group, London, UK., BMJ, London, UK.] England	10 2021	1756-1833	http://search.ebscohost.com.proxy-ub.rug.nl/login.aspx?direct=true&db=cmedm&AN=34615650&site=ehost-live&scope=site	Objective: To describe prominent authorship positions held by women and the overall percentage of women co-authoring manuscripts submitted during the covid-19 pandemic compared with the previous two years.; Design: Cross sectional study.; Setting: Nine specialist and two large general medical journals.; Population: Authors of research manuscripts submitted between 1 January 2018 and 31 May 2021.;…	Authorship*, Bibliometrics*, Biomedical Research*, COVID-19*, Cross-Sectional Studies, Female, Humans, Manuscripts, Medical as Topic, Medical Writing, Periodicals as Topic, Sex Factors, Time Factors, Cesarean Section	Accession Number: 34615650. Language: English. Date Revised: 20211015. Date Created: 20211007. Date Completed: 20211014. Update Code: 20211220. Publication Type: Journal Article, Research Support, Non-U.S. Gov't. Journal ID: 8900488. Publication Model: Electronic. Cited Medium: Internet. NLM ISO Abbr: BMJ. PubMed Central ID: PMC8493599. Comment: Comment in: BMJ. 2021 Oct 6;375:n2381. (PMID: 34615…
Included	Journal Article	Shalaby M,Allam N,Buttorff GJ	Leveling the field: Gender inequity in academia during COVID-19	PS - Political Science and Politics	2021	54	4	661-667	Cambridge University Press	[University of Wisconsin-Madison, United States, Rutgers University, United States, University of Houston, United States]	2021	1049-0965	https://www.scopus.com/inward/record.uri?eid=2-s2.0-85106146791&doi=10.1017%2fS1049096521000615&partnerID=40&md5=557a28faec3e2aedd33db1fc8bcd6635	This article explores the differential impact of the COVID-19 pandemic on the productivity of male and female academics and whether the ongoing health crisis will exacerbate further the existing gender gap in academia in both the short and long terms. We present early evidence of the pandemic's disproportionate effect on women's research productivity using online survey data supplemented by inter…	Socioeconomic Factors	Cited By :1 Export Date: 28 February 2022 | RAYYAN-INCLUSION: Kiran=>Included | RAYYAN-INCLUSION: Kiran=>Included	English
Included	Journal Article	Gerding AB,Swan SJ,Brayer KA,Abdel-Rahman SM	Scholarly Productivity in Clinical Pharmacology Amid Pandemic-Related Workforce Disruptions: Are Men and Women Affected Equally?	Clinical Pharmacology and Therapeutics	2021	110	4	841-844	John Wiley and Sons Inc	[American Society for Clinical Pharmacology and Therapeutics, Alexandria, VA, United States, Children’s Mercy Hospital, Kansas City, MO, United States, University of Missouri – Kansas City School of Medicine, Kansas City, MO, United States]	2021	0009-9236	https://www.scopus.com/inward/record.uri?eid=2-s2.0-85115034914&doi=10.1002%2fcpt.2358&partnerID=40&md5=6310ee91f72ac1c728e01e1389b3e1af		child care, clinical pharmacology, clinical research, comparative study, descriptive research, Editorial, gender identity, health workforce, human, information processing, medical society, productivity, publication, sex difference, sexual orientation, social justice, timeliness (data), virtual learning environment, work engagement, work from home, female, male, scholarly communication, COVID-19, …	Cited By :1 Export Date: 28 February 2022 CODEN: CLPTA Correspondence Address: Abdel-Rahman, S.M.; Children’s Mercy HospitalUnited States; email: srahman@cmh.edu | RAYYAN-INCLUSION: Kiran=>Included | RAYYAN-INCLUSION: Kiran=>Included	English
Included	Journal Article	Quak E,Girault G,Thenint MA,Weyts K,Lequesne J,Lasnon C	Author Gender Inequality in Medical Imaging Journals and the COVID-19 Pandemic	Radiology	2021	300	1	E301-E307	Radiological Society of North America Inc.	[Department of Nuclear Medicine, Medical Library, Department of Radiology, Department of Biostatistics, UNICANCER, Comprehensive Cancer Centre François Baclesse, Avenue Général Harris, Caen, 14076, France, Normandy University, UNICAEN, INSERM 1086 ANTICIPE, Caen, France]	2021	0033-8419	https://www.scopus.com/inward/record.uri?eid=2-s2.0-85109053717&doi=10.1148%2fradiol.2021204417&partnerID=40&md5=2b9d0d7141e4e4a025a838de1928e51b	Background: Early reports show the unequal effect the COVID-19 pandemic might have on men versus women engaged in medical research. Purpose: To investigate whether the COVID-19 pandemic has had an impact on scientific publishing by female physicians in medical imaging. Materials and Methods: The authors conducted a descriptive bibliometric analysis of the gender of the first and last authors of m…	Africa, Article, Asia, author, bibliometrics, coronavirus disease 2019, data analysis software, diagnostic imaging, Europe, female physician, human, journal impact factor, medical research, Middle East, North America, North American, odds ratio, Pacific islands, pandemic, publishing, quality control, sex difference, sexism, South America, systematic review, female, male, publication, quarantine, …	Cited By :7 Export Date: 28 February 2022 CODEN: RADLA Correspondence Address: Quak, E.; Department of Nuclear Medicine, Avenue Général Harris, France; email: e.quak@baclesse.unicancer.fr | RAYYAN-INCLUSION: Kiran=>Included | RAYYAN-INCLUSION: Kiran=>Included	English
Included	Journal Article	Breuning M,Fattore C,Ramos J,Scalera J	The Great Equalizer? Gender, Parenting, and Scholarly Productivity during the Global Pandemic	PS - Political Science and Politics	2021	54	3	427-431	Cambridge University Press	[Department of Political Science Faculty, Castleberry Peace Institute, Faculty of Women's and Gender, University of North Texas, United States, Department of Political Science and Faculty, International Studies Program, Center for Women and Gender Studies, West Virginia University, United States, Department of Political Science and International Relations, Loyola Marymount University, United Stat…	2021	1049-0965	https://www.scopus.com/inward/record.uri?eid=2-s2.0-85106159583&doi=10.1017%2fS1049096520002036&partnerID=40&md5=398bf28027e3a83f488991cb52f8f4fd	Has the global COVID-19 pandemic negatively impacted the scholarly productivity of academics? Do gender and parenting magnify its effect? To obtain insight into the changes the pandemic has wrought in the lives and careers of women and parents in academia, we surveyed scholars in political science and international studies. The survey was in the field during the period in which many academics wer…		Cited By :4 Export Date: 28 February 2022 | RAYYAN-INCLUSION: Kiran=>Included | RAYYAN-INCLUSION: Kiran=>Included	English
Included	Journal Article	Cook J,Gupta M,Nakayama J,El-Nashar S,Kesterson J,Wagner S	Gender differences in authorship of obstetrics and gynecology publications during the coronavirus disease 2019 pandemic	American journal of obstetrics & gynecology MFM	2021	3	1	100268	Elsevier Inc	[Department of Obstetrics, Gynecology and Reproductive Sciences, McGovern Medical School, The University of Texas Health Science Center at Houston, Houston, TX., Department of Obstetrics, Gynecology and Reproductive Sciences, McGovern Medical School, The University of Texas Health Science Center at Houston, Houston, TX., Department of Reproductive Biology, Case Western Reserve University, Clevela…	1 2021	2589-9333	http://search.ebscohost.com.proxy-ub.rug.nl/login.aspx?direct=true&db=cmedm&AN=33103099&site=ehost-live&scope=site		Authorship/*standards, COVID-19/*diagnosis, Publications/*statistics & numerical data, SARS-CoV-2/*genetics, COVID-19/epidemiology, COVID-19/virology, Female, Gynecology/statistics & numerical data, Humans, Male, Obstetrics/statistics & numerical data, Physicians/statistics & numerical data, Publications/trends, Sex Characteristics	Accession Number: 33103099. Language: English. Date Revised: 20210312. Date Created: 20201026. Date Completed: 20210125. Update Code: 20211220. Publication Type: Comparative Study, Journal Article. Journal ID: 101746609. Publication Model: Print-Electronic. Cited Medium: Internet. NLM ISO Abbr: Am J Obstet Gynecol MFM. PubMed Central ID: PMC7574786. Linking ISSN: 25899333. Subset: MEDLINE; Date o…
Included	Journal Article	Ovalle Diaz J,Gorgen AR,Teixeira da Silva AG,de Oliveira Paludo A,Timóteo de Oliveira R,Rosito N,Barroso U J,Corbetta JP,López Egaña PJ,Tavares PM,Rosito TE	Burnout syndrome in pediatric urology: A perspective during the COVID-19 pandemic — Ibero-American survey	Journal of Pediatric Urology	2021	17	3	402.e1-402.e7	Elsevier Ltd	[Hospital de Clínicas de Porto Alegre, Porto Alegre, Rio Grande do Sul, Brazil, Universidade Federal Rio Grande Do Sul, Porto Alegre, Rio Grande do Sul, Brazil, Hospital Geral Roberto Santos, Salvador, Bahia, Brazil, Hospital Garrahan, Buenos Aires, Argentina, Hospital Dr. Exequiel González Cortés, Santiago de Chile, Chile]	2021	1477-5131	https://www.scopus.com/inward/record.uri?eid=2-s2.0-85101326115&doi=10.1016%2fj.jpurol.2021.01.015&partnerID=40&md5=9413974ce26573c05865a4c2b6eaa466	Introduction: Burnout syndrome is a major cause of decreased life quality, mental health, and productivity for physicians. It is strongly related to work overload and has been a scarcely studied topic in pediatric urology. During the COVID-19 pandemic, authorities’ recommendations have led to big changes in pediatric urology practice worldwide. This study aimed to evaluate the level of burnout in…	COVID-19, Mental health, Pandemic, Pediatric urology, Professional burnout, adult, Argentina, Article, Brazil, burnout, child urology, Chile, Colombia, Copenhagen Burnout Inventory, coronavirus disease 2019, cross-sectional study, demography, female, human, job stress, major clinical study, male, Mexico, pandemic, questionnaire, sex difference, Spain, stress assessment, urologist, Western Hemisph…	Export Date: 28 February 2022 Correspondence Address: Ovalle Diaz, J.; Hospital de Clínicas de Porto alegre, Rua Ramiro Barcelos, 2350, Brazil; email: joha_o@hotmail.com | RAYYAN-INCLUSION: Kiran=>Included | RAYYAN-INCLUSION: Kiran=>Included	English
Included	Journal Article	Williams W.A II,Li A,Goodman DM,Ross LF	Impact of the Coronavirus Disease 2019 Pandemic on Authorship Gender in The Journal of Pediatrics: Disproportionate Productivity by International Male Researchers	Journal of Pediatrics	2021	231		50-54	Mosby Inc.	[Feinberg School of Medicine, Northwestern University, Chicago, IL, United States, Pritzker School of Medicine, University of Chicago, Chicago, IL, United States, Division of Critical Care Medicine, Ann and Robert H. Lurie Children's Hospital of Chicago, Chicago, IL, United States, MacLean Center for Clinical Medical Ethics, University of Chicago, Chicago, IL, Department of Pediatrics, University…	2021	0022-3476	https://www.scopus.com/inward/record.uri?eid=2-s2.0-85100222423&doi=10.1016%2fj.jpeds.2020.12.032&partnerID=40&md5=1fa79bae72514a603723921273a0c978	Objective: To assess the impact of the coronavirus disease 2019 (COVID-19) pandemic on authorship gender in articles submitted to The Journal of Pediatrics. Study design: Using gender-labeling algorithms and human inspection, we inferred the gender of corresponding authors of original articles submitted in January-February and April-May of 2019 and 2020 noting those articles related to the COVID-…	authorship, COVID-19, female physicians, gender, gender bias, international, pandemic, publications, women in pediatrics, algorithm, Article, child, controlled study, coronavirus disease 2019, ethnic difference, female, female physician, human, informed consent, major clinical study, male, pediatrics, priority journal, productivity, sex difference, bibliometrics, epidemiology, publication, sex fa…	Cited By :4 Export Date: 28 February 2022 CODEN: JOPDA Correspondence Address: Ross, L.F.; Department of Pediatrics, 5841 S Maryland Ave, MC 6082, United States; email: Lross@uchicago.edu | RAYYAN-INCLUSION: Kiran=>Included | RAYYAN-INCLUSION: Kiran=>Included	English
Included	Journal Article	Krukowski RA,Jagsi R,Cardel MI	Academic productivity differences by gender and child age in science, technology, engineering, mathematics, and medicine faculty during the COVID-19 pandemic	Journal of Women's Health	2021	30	3	341-347	Mary Ann Liebert Inc.	[Department of Preventive Medicine, College of Medicine, University of Tennessee Health Science Center, Memphis, TN, United States, Department of Radiation Oncology and Center for Bioethics and Social Sciences in Medicine, University of Michigan Medical School, Ann Arbor, MI, United States, Department of Health Outcomes and Biomedical Informatics, College of Medicine, University of Florida, Gaine…	2021	1540-9996	https://www.scopus.com/inward/record.uri?eid=2-s2.0-85102183717&doi=10.1089%2fjwh.2020.8710&partnerID=40&md5=23ff602b89c4f066273b4261ea7b3807	Background: Due to the COVID-19 pandemic, most faculty in science, technology, engineering, mathematics, and medicine (STEMM) began working from home, including many who were simultaneously caring for children. The objective was to assess associations of gender and parental status with self-reported academic productivity before (i.e., mid-January to mid-March 2020) and during the pandemic (i.e., …	gender in STEM, science policy, work-family balance, age, Article, author, biology, chemistry, coronavirus disease 2019, engineering, female, funding, health science, human, male, mathematics, medical literature, medicine, pandemic, parental behavior, peer review, physics, politics, priority journal, productivity, publishing, school teacher, science, self report, sex difference, sociology, techno…	Cited By :40 Export Date: 28 February 2022 CODEN: JWHOA Correspondence Address: Krukowski, R.A.; Department of Preventive Medicine, 66 N. Pauline Street, United States; email: rkrukows@uthsc.edu | RAYYAN-INCLUSION: Kiran=>Included | RAYYAN-INCLUSION: Kiran=>Included	English
Included	Journal Article	Stenson MC,Fleming JK,Johnson SL,Caputo JL,Spillios KE,Mel AE	Impact of COVID-19 on access to laboratories and human participants: exercise science faculty perspectives	Advances in physiology education	2022	46	2	211-218	American Physiological Society	[College of Saint Benedict/Saint John's University, Collegeville, Minnesota., University of Tennessee, Knoxville, Tennessee., Middle Tennessee State University, Murfreesboro, Tennessee., Middle Tennessee State University, Murfreesboro, Tennessee., University of Mount Union, Alliance, Ohio., Mercy College, Dobbs Ferry, New York.] United States	6 2022	1522-1229	http://search.ebscohost.com.proxy-ub.rug.nl/login.aspx?direct=true&db=cmedm&AN=35085034&site=ehost-live&scope=site	Restrictions due to the coronavirus (COVID-19) pandemic impacted the ability of faculty and students in exercise science to work in lab settings with human participants. The purpose of this study was to determine how exercise science faculty were impacted by COVID-19 restrictions with respect to access and use of exercise science lab and research facilities. Of the 100 surveyed participants categ…	higher education, pandemic, research productivity, workload inequity, Humanities, Humanism, Humans	Accession Number: 35085034. Language: English. Date Revised: 20220225. Date Created: 20220127. Update Code: 20220226. Publication Type: Journal Article. Journal ID: 100913944. Publication Model: Print-Electronic. Cited Medium: Internet. NLM ISO Abbr: Adv Physiol Educ. Linking ISSN: 10434046. Subset: MEDLINE; Date of Electronic Publication: 2022 Jan 27. ; Original Imprints: Publication: Bethesda, …
Included	Journal Article	Nguyen AX,Trinh XV,Kurian J,Wu AY	Impact of COVID-19 on longitudinal ophthalmology authorship gender trends	Graefe's archive for clinical and experimental ophthalmology = Albrecht von Graefes Archiv fur klinische und experimentelle Ophthalmologie	2021	259	3	733-744	Springer-Verlag	[Faculty of Medicine, McGill University, Montreal, QC, Canada., Department of Computer Science, McGill University, Montreal, QC, Canada., Department of Ophthalmology, Stanford University School of Medicine, 2370 Watson Court, Suite 200, Palo Alto, CA, 94303, USA., Department of Ophthalmology, Stanford University School of Medicine, 2370 Watson Court, Suite 200, Palo Alto, CA, 94303, USA. awu1@sta…	3 2021	1435-702X	http://search.ebscohost.com.proxy-ub.rug.nl/login.aspx?direct=true&db=cmedm&AN=33537883&site=ehost-live&scope=site	Background: The COVID-19 pandemic increased the gender gap in academic publishing. This study assesses COVID-19's impact on ophthalmology gender authorship distribution and compares the gender authorship proportion of COVID-19 ophthalmology-related articles to previous ophthalmology articles.; Methods: This cohort study includes authors listed in all publications related to ophthalmology in the C…	Authorship*, Journal Impact Factor*, SARS-CoV-2*, Sex Distribution*, COVID-19/*epidemiology, Ophthalmology/*trends, Publishing/*statistics & numerical data, Databases, Factual, Female, Humans, Male, Periodicals as Topic/statistics & numerical data, Physicians, Women/statistics & numerical data, Authorship, COVID-19, Gender, Ophthalmology	Accession Number: 33537883. Language: English. Date Revised: 20210406. Date Created: 20210204. Date Completed: 20210305. Update Code: 20211220. Publication Type: Journal Article. Journal ID: 8205248. Publication Model: Print-Electronic. Cited Medium: Internet. NLM ISO Abbr: Graefes Arch Clin Exp Ophthalmol. PubMed Central ID: PMC7857347. Linked References: Nielsen MW, Bloch CW, Schiebinger L (201…
Included	Journal Article	Ribarovska AK,Hutchinson MR,Pittman QJ,Pariante C,Spencer SJ	Gender inequality in publishing during the COVID-19 pandemic	Brain, Behavior, and Immunity	2021	91		1-3	Elsevier Science	Spencer, Sarah J., School of Health and Biomedical Sciences, RMIT University, Melbourne, VIC, Australia	01 2021			The article reflects on the issue of gender inequality in publishing during the COVID-19 pandemic. Authors appreciate the limitations of surmising gender based on name and appearance and suggest there is a strong need for a database where self-declared gender information can be collected for each journal. We acknowledge that the reasons behind any gender-based publishing disadvantage are currentl…	COVID-19, Gender, Authorship, Pandemic, Humans, Pandemics, Peer Review, Research, Publishing, SARS-CoV-2, Sexism, Socioeconomic Factors, Sciences, Scientific Communication, Gender Equality, Coronavirus, Employment Status, Family, Policy Making, Viral Disorders	Accession Number: 2020-97974-003. PMID: 33212208 Partial author list: First Author & Affiliation: Ribarovska, Alana K.; School of Health and Biomedical Sciences, RMIT University, Melbourne, VIC, Australia. Release Date: 20210128. Correction Date: 20210712. Publication Type: Journal (0100), Peer Reviewed Journal (0110). Format Covered: Electronic. Document Type: Journal Article. Language: EnglishG…
Included	Journal Article	Plaunova A,Heller SL,Babb JS,Heffernan CC	Impact of COVID-19 on Radiology Faculty - An Exacerbation of Gender Differences in Unpaid Home Duties and Professional Productivity	Academic radiology	2021	28	9	1185-1190	Association Of University Radiologists	[NYU Grossman School of Medicine, 160 East 34th St, 3rd Floor, New York, New York 10016., NYU Grossman School of Medicine, 160 East 34th St, 3rd Floor, New York, New York 10016., NYU Grossman School of Medicine, 160 East 34th St, 3rd Floor, New York, New York 10016., NYU Grossman School of Medicine, 160 East 34th St, 3rd Floor, New York, New York 10016. Electronic address: Cathleen.Heffernan@nyul…	9 2021	1878-4046	http://search.ebscohost.com.proxy-ub.rug.nl/login.aspx?direct=true&db=cmedm&AN=34266739&site=ehost-live&scope=site	Rationale and Objectives: The COVID-19 pandemic stresses the tenuous balance between domestic obligations and academic output for women across professions. Our investigation aims to evaluate the impact of the pandemic on the home duties and workplace productivity of academic radiologists with respect to gender.; Materials and Methods: A 49-question survey was distributed to 926 members of Associa…	COVID-19*, Radiology*, Career Mobility, Child, Preschool, Faculty, Medical, Female, Humans, Male, Pandemics, SARS-CoV-2, Sex Factors, Gender Differences During COVID-19*, female*, homecare*, productivity*, Radiology	Accession Number: 34266739. Language: English. Date Revised: 20210906. Date Created: 20210716. Date Completed: 20210906. Update Code: 20211220. Publication Type: Journal Article. Journal ID: 9440159. Publication Model: Print-Electronic. Cited Medium: Internet. NLM ISO Abbr: Acad Radiol. Linking ISSN: 10766332. Subset: MEDLINE; Date of Electronic Publication: 2021 May 25. Current Imprints: Publica…
Included	Journal Article	Camerlink I,Nielsen BL,Windschnurer I,Vigors B	Impacts of the COVID-19 pandemic on animal behaviour and welfare researchers	Applied animal behaviour science	2021	236		105255	Elsevier	[Institute of Genetics and Animal Biotechnology, Polish Academy of Sciences, Ul. Postępu 36A, 05-552, Magdalenka, Jastrzębiec, Poland., Université Paris-Saclay, INRAE, AgroParisTech, UMR Modélisation Systémique Appliquée aux Ruminants, 75005, Paris, France.; Universities Federation for Animal Welfare (UFAW), The Old School, Brewhouse Hill, Wheathampstead, AL4 8AN, United Kingdom., Institute of An…	3 2021	0168-1591	http://search.ebscohost.com.proxy-ub.rug.nl/login.aspx?direct=true&db=cmedm&AN=33583984&site=ehost-live&scope=site	The COVID-19 pandemic has resulted in many changes in the way research is conducted. Some specific groups (e.g. women) and activities (e.g. teaching) may have been disproportionally affected. Our aim was to assess the impact of the COVID-19 pandemic on animal behaviour and welfare researchers' work experience and productivity, focussing on gender, care role, career stage and teaching load. An onl…	Care role, Corona virus, Gender equality, Pandemic, Psychological stress, Research output, Animal Shells, Animals	Accession Number: 33583984. Language: English. Date Revised: 20210319. Date Created: 20210215. Update Code: 20211220. Publication Type: Journal Article. Journal ID: 8504276. Publication Model: Print-Electronic. Cited Medium: Print. NLM ISO Abbr: Appl Anim Behav Sci. PubMed Central ID: PMC7871892. Linked References: J Adolesc Health. 2020 Oct;67(4):514-518. (PMID: 32753347); J Med Internet Res. 20…
Included	Journal Article	Biondi B,Barrett CB,Mazzocchi M,Ando A,Harvey D,Mallory M	Journal submissions, review and editorial decision patterns during initial COVID-19 restrictions	Food policy	2021	105		102167	IPC Science and Technology Press	[University of Bologna, Italy., Cornell University, United States., University of Bologna, Italy., University of Illinois Urbana-Champaign, United States., University of Newcastle upon Tyne, UK., Purdue University, United States.] England	12 2021	0306-9192	http://search.ebscohost.com.proxy-ub.rug.nl/login.aspx?direct=true&db=cmedm&AN=34703074&site=ehost-live&scope=site	We use the full administrative records from four leading agricultural economics journals to study the impacts of the COVID-19 pandemic on manuscript submission, editorial desk rejection and reviewer acceptance rates, and time to editorial decision. We also test for gender differences in these impacts. Manuscript submissions increased sharply and equi-proportionately by gender. Desk rejection rate…	COVID-19, Decision time, Gender bias, Publishing, Review response rate, Scholarly journals, Submission rate	Accession Number: 34703074. Language: English. Date Revised: 20211208. Date Created: 20211027. Update Code: 20211220. Publication Type: Journal Article. Journal ID: 101084288. Publication Model: Print-Electronic. Cited Medium: Print. NLM ISO Abbr: Food Policy. PubMed Central ID: PMC8530540. Linked References: Nat Hum Behav. 2020 Sep;4(9):880-883. (PMID: 32669671); Sociol Compass. 2021 Jun;15(6):e…
Included	Journal Article	Lerchenmüller C,Schmallenbach L,Jena AB,Lerchenmueller MJ	Longitudinal analyses of gender differences in first authorship publications related to COVID-19	BMJ open	2021	11	4	e045176	BMJ Publishing Group Ltd	[Department of Cardiology, Angiology, Pulmonology, University Hospital Heidelberg, Heidelberg, Germany carolin.lerchenmueller@med.uni-heidelberg.de.; German Center for Heart and Cardiovascular Research (DZHK), Heidelberg/Mannheim, Germany., Area Management, University of Mannheim, Mannheim, Germany., Department of Health Care Policy, Harvard Medical School, Boston, Massachusetts, USA.; Department…	4 2021	2044-6055	http://search.ebscohost.com.proxy-ub.rug.nl/login.aspx?direct=true&db=cmedm&AN=33820790&site=ehost-live&scope=site	Objective: Concerns have been raised that the COVID-19 pandemic has shifted research productivity to the disadvantage of women in academia, particularly in early career stages. In this study, we aimed to assess the pandemic's effect on women's COVID-19-related publishing over the first year of the pandemic.; Methods and Results: We compared the gender distribution of first authorships for 42 898 …	Authorship*, COVID-19*, Sex Factors*, Publications/*statistics & numerical data, Bibliometrics, Female, Humans, Male, Pandemics, Periodicals as Topic/statistics & numerical data, SARS-CoV-2, Sex Characteristics, general medicine (see internal medicine)*, health policy*	Accession Number: 33820790. Language: English. Date Revised: 20210412. Date Created: 20210406. Date Completed: 20210412. Update Code: 20211220. Publication Type: Journal Article, Research Support, N.I.H., Extramural, Research Support, Non-U.S. Gov't. Journal ID: 101552874. Publication Model: Electronic. Cited Medium: Internet. NLM ISO Abbr: BMJ Open. PubMed Central ID: PMC8025238. Linked Referenc…
Included	Journal Article	C,Ido MR,Marques D,De Oliveira VE,Biroli F	Social Sciences In The Covid-19 Pandemic: Work Routines And Inequalities	Sociologia e Antropologia	2021	11		32-65	Universidade Federal do Rio de Janeiro	[I Universidade do Estado do Rio de Janeiro (Uerj), Instituto de Estudos Sociais e Políticos, Rio de Janeiro, RJ, Brazil, II Universidade de Brasília (UnB), Instituto de Ciência Política, Brasília, DF, Brazil, Universidade Federal do ABC (UFABC), Programas de Pós-Graduação em Políticas Públicas e em Planejamento e Gestão do Território, Santo André, SP, Brazil, IV Universidade de Brasília (UnB), I…	2021	2238-3875	https://www.scopus.com/inward/record.uri?eid=2-s2.0-85118190315&doi=10.1590%2f2238-38752021v11esp2&partnerID=40&md5=bb3d50e76eb4366ba95278bde9de9e39	The purpose of this text is to analyze the consequences of the covid-19 pandemic in the academic work routines of Social Sciences in Brazil. The study is based on the results of a survey disseminated with the support of professional associations in Anthropology, Political Science, Sociology and International Relations. The article presents the profile of the 1,073 participants and their perceptio…	academic work, Ciências sociais, desigualdades, inequalities, pandemia, pandemic, Social sciences, survey, trabalho acadêmico, Socioeconomic Factors	Export Date: 28 February 2022 Correspondence Address: Candido, M.R.; I Universidade do Estado do Rio de Janeiro (Uerj), Brazil | RAYYAN-INCLUSION: Kiran=>Included | RAYYAN-INCLUSION: Kiran=>Included	English; Portuguese
Included	Journal Article	Defilippis EM,Sinnenberg L,Mahmud N,Wood MJ,Hayes SN,Michos ED,Reza N	Gender differences in publication authorship during covid-19: A bibliometric analysis of high-impact cardiology journals	Journal of the American Heart Association	2021	10	5	1-6	American Heart Association Inc.	[Division of Cardiology, Columbia University Irving Medical Center, New York, NY, United States, Department of Medicine, Brigham and Women’s Hospital, Harvard Medical School, Boston, MA, United States, Division of Gastroenterology, Department of Medicine, Perelman School of Medicine at the University of Pennsylvania, Philadelphia, PA, United States, Division of Cardiology, Massachusetts General H…	2021	2047-9980	https://www.scopus.com/inward/record.uri?eid=2-s2.0-85102538602&doi=10.1161%2fJAHA.120.019005&partnerID=40&md5=8a3ef23ec44b3799dd28b224878b3a1c	BACKGROUND: The purpose of this study was to examine gender differences in authorship of manuscripts in select high-impact cardiology journals during the early coronavirus disease 2019 (COVID-19) pandemic. METHODS AND RESULTS: All manuscripts published between March 1, 2019 to June 1, 2019 and March 1, 2020 to June 1, 2020 in 4 high-impact cardiology journals (Journal of the American College of C…	Academic cardiology, Coronavirus disease 2019, Pandemic, Productivity, Publication, Women, Article, author, bibliometric analysis, controlled study, coronavirus disease 2019, female, gender, human, journal impact factor, male, publication, sex difference, statistical analysis, bibliometrics, cardiology, epidemiology, pandemic, sex factor, writing, Authorship, Bibliometrics, Cardiology, COVID-19, …	Cited By :9 Export Date: 28 February 2022 Correspondence Address: Reza, N.; Division of Cardiovascular Medicine, 11 South Tower, Room 11-145, 3400 Civic Center Blvd, United States; email: nosheen.reza@pennmedicine.upenn.edu | RAYYAN-INCLUSION: Kiran=>Included | RAYYAN-INCLUSION: Kiran=>Included	English
Included	Journal Article	Bell K,Green J	Premature evaluation? Some cautionary thoughts on global pandemics and scholarly publishing	Critical Public Health	2020	30	4	379-383	Routledge	[Department of Life Sciences, University of Roehampton, London, UK, Wellcome Centre for Cultures & Environments of Health, University of Exeter, Exeter, UK] Oxfordshire, <Blank>	9 2020	0958-1596	http://search.ebscohost.com.proxy-ub.rug.nl/login.aspx?direct=true&db=cin20&AN=145133866&site=ehost-live&scope=site	The author offers insights on the impact of the coronavirus disease 2019 (COVID-19) pandemic on scholarly publications. Topics discussed include the recorded increase in research initiatives focused on the pandemic and public health, the research submission patterns observed between male and female academics which highlighted the inequality in knowledge production, and brief details about the rej…	COVID-19 Pandemic, Electronic Publishing, World Health, Serial Publications, Public Health, COVID-19	Accession Number: 145133866. Language: English. Entry Date: 20200905. Revision Date: 20220105. Publication Type: Editorial; editorial; tables/charts. Journal Subset: Peer Reviewed; Public Health; USA. NLM UID: 9810774. | RAYYAN-INCLUSION: Kiran=>Included | RAYYAN-INCLUSION: Kiran=>Included
Included	Journal Article	Guintivano J,Dick D,Bulik CM	Psychiatric genomics research during the COVID-19 pandemic: A survey of Psychiatric Genomics Consortium researchers	American journal of medical genetics. Part B, Neuropsychiatric genetics : the official publication of the International Society of Psychiatric Genetics	2021	186	1	40-49	Wiley-Blackwell	[Department of Psychiatry, University of North Carolina at Chapel Hill, Chapel Hill, North Carolina, USA., Departments of Psychology and Human & Molecular Genetics, Virginia Commonwealth University, Richmond, Virginia, USA., Department of Psychiatry, University of North Carolina at Chapel Hill, Chapel Hill, North Carolina, USA.; Department of Medical Epidemiology and Biostatistics, Karolinska Ins…	1 2021	1552-485X	http://search.ebscohost.com.proxy-ub.rug.nl/login.aspx?direct=true&db=cmedm&AN=33605055&site=ehost-live&scope=site	Between April 20, 2020 and June 19, 2020 we conducted a survey of the membership of the Psychiatric Genomics Consortium (PGC) to explore the impact of COVID-19 on their research and academic careers. A total of 123 individuals responded representing academic ranks from trainee to full professor, tenured and fixed-term appointments, and all genders. The survey included both quantitative and free t…	Surveys and Questionnaires*, COVID-19/*epidemiology, COVID-19/*virology, SARS-CoV-2/*pathogenicity, Female, Genomics, Humans, Male, Minority Groups/statistics & numerical data, Research Personnel/statistics & numerical data, COVID-19*, academic medicine*, faculty*, funding*, promotion*, Genome	Accession Number: 33605055. Language: English. Date Revised: 20210403. Date Created: 20210219. Date Completed: 20210315. Update Code: 20211220. Publication Type: Journal Article, Research Support, N.I.H., Extramural, Research Support, Non-U.S. Gov't. Journal ID: 101235742. Publication Model: Print-Electronic. Cited Medium: Internet. NLM ISO Abbr: Am J Med Genet B Neuropsychiatr Genet. PubMed Cent…
Included	Journal Article	Fox CW,Meyer J	The influence of the global COVID-19 pandemic on manuscript submissions and editor and reviewer performance at six ecology journals	Functional Ecology	2021	35	1	4-10	Blackwell Publishing Ltd	[Department of Entomology, University of Kentucky, Lexington, KY, United States, British Ecological Society, London, United Kingdom]	2021	0269-8463	https://www.scopus.com/inward/record.uri?eid=2-s2.0-85098993797&doi=10.1111%2f1365-2435.13734&partnerID=40&md5=3cbcdbc3f64692fb58b6334626f0af7a	Government policies attempting to slow the spread of COVID-19 have reduced access to research laboratories and shifted many scholars to working from home. These disruptions will likely influence submissions to scholarly journals, and affect the time available for editors and reviewers to participate in peer review. In this editorial we examine how journal submissions, and editorial and peer revie…	authorship, editorial boards, gender, pandemic, peer review	Cited By :10 Export Date: 28 February 2022 CODEN: FECOE Correspondence Address: Fox, C.W.; Department of Entomology, United States; email: cfox@uky.edu | RAYYAN-INCLUSION: Kiran=>Included | RAYYAN-INCLUSION: Kiran=>Included	English
Included	Journal Article	Bell ML,Fong KC	Gender differences in first and corresponding authorship in public health research submissions during the COVID-19 pandemic	American Journal of Public Health	2021	111	1	159-163	American Public Health Association Inc.	School of the Environment, Yale University, New Haven, CT, United States	2021	0090-0036	https://www.scopus.com/inward/record.uri?eid=2-s2.0-85098673580&doi=10.2105%2fAJPH.2020.305975&partnerID=40&md5=aa0fd23c7c2016c4f5d63a383671e31b	Objectives. To investigate the rate of manuscript submission to a major peer-reviewed journal (American Journal of Public Health) by gender, comparing periods before and during the pandemic. Methods. We used data from January 1 to May 12, 2020, and defined the start of the pandemic period by country as the first date of 50 or more confirmed cases. We used an algorithm to classify gender based on …	bibliometrics, female, global health, human, male, public health, publishing, sex ratio, writing, Authorship, Bibliometrics, COVID-19, Female, Global Health, Humans, Male, Public Health, Publishing, Sex Distribution	Cited By :15 Export Date: 28 February 2022 CODEN: AJPEA Correspondence Address: Bell, M.L.; Yale University, 195 Prospect St, United States; email: Michelle.Bell@yale.edu | RAYYAN-INCLUSION: Kiran=>Included | RAYYAN-INCLUSION: Kiran=>Included	English
Included	Journal Article	Rodríguez-Rivero R,Yáñez S,Fernández-Aller C,Carrasco-Gallego R	Is it time for a revolution in work-life balance? Reflections from spain	Sustainability (Switzerland)	2020	12	22	1-25	MDPI	[Department of Organization Engineering, Business Administration and Statistics, ETSI Industriales, Universidad Politécnica de Madrid, Madrid, 28006, Spain, Department of IT Systems, ETSI Sistemas Informáticos, Universidad Politécnica de Madrid, Madrid, 28031, Spain]	2020	2071-1050	https://www.scopus.com/inward/record.uri?eid=2-s2.0-85096210752&doi=10.3390%2fsu12229563&partnerID=40&md5=577c0c97c0a825d085ae4cfb7821b5e5	The COVID-19 crisis has taken the world by surprise, and its effects are widening pre-existing inequalities such as socioeconomical, educational, and digital divides. The gender gap is no exception, and research shows that lockdowns are strongly impacting women, who, on the whole, are more vulnerable to the effects of a crisis. This study analyzes the impact of the COVID-19 lockdown in Spain on f…	COVID-19 pandemic, Gender equality, Spain, STEM, Work-life balance, academic performance, digitization, epidemic, equity, gender role, higher education, socioeconomic impact, university sector, viral disease, Madrid [Spain]	Cited By :6 Export Date: 28 February 2022 Correspondence Address: Rodríguez-Rivero, R.; Department of Organization Engineering, Spain; email: rocio.rodriguez@upm.es | RAYYAN-INCLUSION: Kiran=>Included | RAYYAN-INCLUSION: Kiran=>Included	English
Included	Journal Article	Wehner MR,Li Y,Nead KT,Wehner MR	Comparison of the Proportions of Female and Male Corresponding Authors in Preprint Research Repositories before and during the COVID-19 Pandemic	JAMA Network Open	2020	3	9		American Medical Association	[Department of Health Services Research, University of Texas Md Anderson Cancer Center, 1400 Pressler St, Unit 1444, Office FCT9.5036, Houston, TX 77030, United States, Department of Dermatology, University of Texas Md Anderson Cancer Center, Houston, TX, United States, Department of Epidemiology, University of Texas Md Anderson Cancer Center, Houston, TX, United States, Department of Radiation O…	2020	2574-3805	https://www.scopus.com/inward/record.uri?eid=2-s2.0-85091264176&doi=10.1001%2fjamanetworkopen.2020.20335&partnerID=40&md5=90365ecb8b7bb8244f2057fcf9d0ec16		author, clinical data repository, comparative study, coronavirus disease 2019, cross-sectional study, female, human, Letter, male, medical research, metadata, online system, pandemic, priority journal, publication, sex difference, Betacoronavirus, Coronavirus infection, gender identity, personnel, publishing, virology, virus pneumonia, writing, Authorship, Biomedical Research, Coronavirus Infecti…	Cited By :18 Export Date: 28 February 2022 | RAYYAN-INCLUSION: Kiran=>Included | RAYYAN-INCLUSION: Kiran=>Included	English
Included	Journal Article	Cushman M	Gender gap in women authors is not worse during COVID-19 pandemic: Results from Research and Practice in Thrombosis and Haemostasis	Research and Practice in Thrombosis and Haemostasis	2020	4	5	672-673	Blackwell Publishing Ltd	Department of Medicine, Larner College of Medicine at the University of Vermont, Burlington, VT, United States	2020	2475-0379	https://www.scopus.com/inward/record.uri?eid=2-s2.0-85096202840&doi=10.1002%2frth2.12399&partnerID=40&md5=0eff52dbffbca0e56e5d08ebb7bdaa3c		author, coronavirus disease 2019, Editorial, human, pandemic, priority journal, publication, scientific literature, sexism, Thrombosis	Cited By :8 Export Date: 28 February 2022 Correspondence Address: Cushman, M.; Department of Medicine, United States; email: mary.cushman@uvm.edu | RAYYAN-INCLUSION: Kiran=>Included | RAYYAN-INCLUSION: Kiran=>Included	English
Included	Journal Article	Amano-Patino N,Faraglia E,Giannitsarou C,Hasna Z	The Unequal Effects of Covid-19 on Economists' Research Productivity		2020				Faculty of Economics, University of Cambridge, Cambridge Working Papers in Economics	[Unlisted, Unlisted, Unlisted, Unlisted]	2020		http://search.ebscohost.com.proxy-ub.rug.nl/login.aspx?direct=true&db=ecn&AN=1836279&site=ehost-live&scope=site	The current lock-down measures are expected to disproportionately reduce women's labor productivity in the short run. This paper analyzes the effects of these measures on economists' research productivity. We explore the patterns of working papers publications using data from the NBER Working Papers Series, the CEPR Discussion Paper Series, the newly established research repository Covid Economic…		Accession Number: 1836279; Keywords: COVID-19, Economics Research, Gender Inequality; Publication Type: Working Paper; Update Code: 20200611 | RAYYAN-INCLUSION: Kiran=>Included | RAYYAN-INCLUSION: Kiran=>Included
Included	Journal Article	Barber BM,Jiang WEI,Morse A,Puri M,Tookes H,Werner IM	What Explains Differences in Finance Research Productivity during the Pandemic?	Journal of Finance (John Wiley & Sons, Inc. )	2021	76	4	1655-1697			8 2021	0022-1082	http://search.ebscohost.com.proxy-ub.rug.nl/login.aspx?direct=true&db=buh&AN=151267968&site=ehost-live&scope=site	Based on a survey of American Finance Association members, we analyze how demographics, time allocation, production mechanisms, and institutional factors affect research production during the pandemic. Consistent with the literature, research productivity falls more for women and faculty with young children. Independently, and novel, extra time spent on teaching (much more likely for women) negat…	FINANCIAL research, COVID-19 pandemic, PRODUCTION (Economic theory), DEMOGRAPHIC surveys, TIME management, WOMEN research personnel, COLLEGE teachers, DOCTORAL students, SOCIAL isolation, HEALTH, PSYCHOLOGICAL feedback, AMERICAN Finance Association	Accession Number: 151267968; BARBER, BRAD M.; JIANG, WEI; MORSE, ADAIR; PURI, MANJU; TOOKES, HEATHER; WERNER, INGRID M.; Email Address: werner.47@osu.edu; Issue Info: Aug2021, Vol. 76 Issue 4, p1655; Thesaurus Term: FINANCIAL research; Thesaurus Term: COVID-19 pandemic; Thesaurus Term: PRODUCTION (Economic theory); Thesaurus Term: DEMOGRAPHIC surveys; Thesaurus Term: TIME management; Subject Term…
Included	Journal Article	Wooden P,Hanson B	Effects of the COVID-19 Pandemic on Authors and Reviewers of American Geophysical Union Journals	Earth and Space Science	2022				John Wiley & Sons, Inc.	Hoboken	2022		http://server.proxy-ub.rug.nl/login?url=https://www.proquest.com/scholarly-journals/effects-covid-19-pandemic-on-authors-reviewers/docview/2627039061/se-2	The COVID-19 pandemic affected the scientific workforce in many ways. Many worried that stay-at-home orders would disproportionately harm the productivity and well-being of women and early-career scientists, who were expected to shoulder more childcare, homeschooling, and other domestic duties while also interrupting field and lab research, essential for career advancement. AGU journal submission…	COVID-19, geoscience journals, author demographics, reviewer demographics, submissions from women, reviewers	Copyright - © 2022. Notwithstanding the ProQuest Terms and Conditions, you may use this content in accordance with the associated terms available at https://novel-coronavirus.onlinelibrary.wiley.com/ Last updated - 2022-02-10 | RAYYAN-INCLUSION: Kiran=>Included | RAYYAN-INCLUSION: Kiran=>Included	English
Included	Journal Article	Rodriguez FL,Solino LA,Szabo JK	Trade-off between urgency and reduced editorial capacity affect publication speed in ecological and medical journals during 2020	Humanities & Social Sciences Communications	2021	8	1		Palgrave Macmillan	Rua Barão de Jeremoabo, Instituto de Biologia, Universidade Federal da Bahia, Salvador, Brazil (GRID:grid.8399.b) (ISNI:0000 0004 0372 8259) ; Rua Engenheiro Edgar Prado Arze, Secretaria de Estado de Educação de Mato Grosso, Cuiabá, Brazil (GRID:grid.8399.b); Fundação Ecotrópica, Cuiabá, Brazil (GRID:grid.8399.b) ; Rua Barão de Jeremoabo, Instituto de Biologia, Universidade Federal da Bahia, Salv…	2021		http://server.proxy-ub.rug.nl/login?url=https://www.proquest.com/scholarly-journals/trade-off-between-urgency-reduced-editorial/docview/2582280344/se-2	While the speed of publication in academic journals has decreased over time, delays in the review process can still cause frustration and damage the authors’ career. During the COVID-19 lockdown, scientists struggled to manage tasks and academic journals announced possible publication delays due to reduced editorial capacity. In this context, COVID-19 research has been somewhat paradoxical, due t…	Social Sciences: Comprehensive Works, Editorials, Impact factors, Coronaviruses, Medical research, COVID-19, Journalism, Medical, Journalism, Medical	Copyright - © The Author(s) 2021. This work is published under http://creativecommons.org/licenses/by/4.0/ (the “License”). Notwithstanding the ProQuest Terms and Conditions, you may use this content in accordance with the terms of the License. Last updated - 2021-10-16 | RAYYAN-INCLUSION: Kiran=>Included | RAYYAN-INCLUSION: Kiran=>Included	English
Included	Journal Article	Ayyala RS,Trout AT	Gender trends in authorship of Pediatric Radiology publications and impact of the COVID-19 pandemic	PEDIATRIC RADIOLOGY						[Cincinnati Childrens Hosp Med Ctr, Dept Radiol, 3333 Burnett Ave, Cincinnati, OH 45229 USA, Univ Cincinnati, Coll Med, Dept Radiol, Cincinnati, OH USA, Cincinnati Childrens Hosp Med Ctr, Dept Pediat, Cincinnati, OH 45229 USA NR - 19 PU - SPRINGER PI - NEW YORK PA - ONE NEW YORK PLAZA, SUITE 4600, NEW YORK, NY, UNITED STATES]				Background The coronavirus disease 2019 (COVID-19) pandemic has heightened existing gender differences in academic productivity in medicine. There have been discrepant repercussions for women in academics due to the pandemic, including fewer publications, potentially impacting academic advancement. Objective To evaluate trends over time in the gender of authors of manuscripts submitted to Pediatr…	Authorship, COVID-19, Gender, Pediatric radiology, Publications	RAYYAN-INCLUSION: Kiran=>Included | RAYYAN-INCLUSION: Kiran=>Included	English
Included	Journal Article	Ellinas EH,Ark TK,Kaljo K,Quinn KG,Krier CR,Farkas AH	Winners and Losers in Academic Productivity During the COVID-19 Pandemic: Is the Gender Gap Widening for Faculty?	JOURNAL OF WOMENS HEALTH						[Med Coll Wisconsin, MCW Ctr Adv Women Sci & Med AWSM, Dept Anesthesiol, Milwaukee, WI 53226 USA, Med Coll Wisconsin, Kern Inst, Milwaukee, WI 53226 USA, Med Coll Wisconsin, Dept Obstet & Gynecol, Milwaukee, WI 53226 USA, Med Coll Wisconsin, Ctr AIDS Intervent Res, Dept Psychiat & Behav Med, Milwaukee, WI 53226 USA, Med Coll Wisconsin, Milwaukee, WI 53226 USA, Med Coll Wisconsin, Dept Med, Div Ge…				Background: The coronavirus pandemic accelerated academic medicine into the frontline of research and clinical work, leaving some faculty exhausted, and others with unanticipated time off. Women were particularly vulnerable, having increased responsibilities in both academic work and caregiving.Methods: The authors sought to determine faculty's responses to the pandemic, seeking predictors of acc…	gender, academic medicine, faculty, COVID-19, work-life balance, WOMEN PHYSICIANS, AUTHORSHIP, BURNOUT	RAYYAN-INCLUSION: Kiran=>Included | RAYYAN-INCLUSION: Kiran=>Included	English
Included	Journal Article	Maguire R,Sinead H,Seebacher B,Block VJ,Zackowski KM,Johanna J,Finlayson M,Prue P,Freeman J,Giesser B,Von GG,Ploughman M	Research interrupted: The impact of the COVID-19 pandemic on multiple sclerosis research in the field of rehabilitation and quality of life	Multiple Sclerosis Journal - Experimental, Translational and Clinical	2021	7	3		Sage Publications Ltd.	Department of Psychology, Maynooth University , County Kildare, Ireland ; School of Health Sciences, National University of Ireland Galway , Galway, Ireland ; Clinical Department of Neurology, Medical University of Innsbruck, Innsbruck, Austria ; Department of Neurology, University of California, San Francisco, CA, USA ; Patient Management Care and Rehabilitation Research, National Multiple Scler…	2021		http://server.proxy-ub.rug.nl/login?url=https://www.proquest.com/scholarly-journals/research-interrupted-impact-covid-19-pandemic-on/docview/2578069479/se-2	Background The COVID-19 pandemic has likely had a negative impact on rehabilitation and quality of life (QoL) research in multiple sclerosis (MS). Method We explored perceived barriers to research among 87 researchers, representing 18 countries, both prior to and since COVID-19. Results A Wilcoxon signed-rank test found that significantly more researchers reported experiencing barriers to researc…	Medical Sciences, Psychiatry And Neurology, Multiple sclerosis, quality of life, rehabilitation, barriers to research, gender, COVID-19, Quality of life, Rehabilitation, Coronaviruses, Pandemics, Medical research, Quality of Life, Multiple Sclerosis	Copyright - © The Author(s) 2021. This work is licensed under the Creative Commons Attribution License https://creativecommons.org/licenses/by/4.0/ (the “License”). Notwithstanding the ProQuest Terms and Conditions, you may use this content in accordance with the terms of the License. Last updated - 2021-10-01 | RAYYAN-INCLUSION: Kiran=>Included | RAYYAN-INCLUSION: Kiran=>Included	English
Included	Journal Article	Squazzoni F,Bravo G,Grimaldo F,Garcia-Costa D,Farjam M,Mehmani B	Gender gap in journal submissions and peer review during the first wave of the COVID-19 pandemic. A study on 2329 Elsevier journals	PLOS ONE	2021	16	10			[Univ Milan, Dept Social & Polit Sci, Milan, Italy, Ctr Data Intens Sci & Applicat, Vaxjo, Sweden, Dept Social Studies, Vaxjo, Sweden, Univ Valencia, Dept Comp Sci, Burjassot, Spain, Lund Univ, Ctr Languages & Literature, European Studies, Lund, Sweden, Elsevier, STM Journals, Amsterdam, Netherlands FU - Italian Ministry of Education, University and ResearchMinistry of Education, Universities and…	2021			During the early months of the COVID-19 pandemic, there was an unusually high submission rate of scholarly articles. Given that most academics were forced to work from home, the competing demands for familial duties may have penalized the scientific productivity of women. To test this hypothesis, we looked at submitted manuscripts and peer review activities for all Elsevier journals between Febru…	Peer Review	RAYYAN-INCLUSION: Kiran=>Included | RAYYAN-INCLUSION: Kiran=>Included	English
Included	Journal Article	Harris B,Sullivan AL,Embleton P,Shaver E,Nguyen T,Kim J,St Clair K,Williams S	Exploratory Investigation of Gender Differences in School Psychology Publishing Before and During the Initial Phase of COVID-19	CANADIAN JOURNAL OF SCHOOL PSYCHOLOGY						[Univ Colorado Denver, 1201 5th St Campus Box 106, Denver, CO 80204 USA, Univ Minnesota, Minneapolis, MN USA NR - 11 PU - SAGE PUBLICATIONS INC PI - THOUSAND OAKS PA - 2455 TELLER RD, THOUSAND OAKS, CA 91320 USA]				Although many disciplines saw increases in manuscript submissions coinciding with lockdown measures, numerous studies have documented widening gender gaps in academic productivity. Chi-squared analyses of gendered trends in first author manuscript submission in three school psychology journals during the initial phase of COVID-19 compared to the same time frame in the preceding 3 years did not re…	gender, school psychology, publishing, academia, COVID-19, Self Psychology	RAYYAN-INCLUSION: Kiran=>Included | RAYYAN-INCLUSION: Kiran=>Included	English
Included	Journal Article	Chen THK,Seto KC	Gender and authorship patterns in urban land science	JOURNAL OF LAND USE SCIENCE						[Yale Univ, Yale Sch Environm, New Haven, CT 06511 USA, Yale Univ, Yale Inst Biospher Studies, New Haven, CT USA FU - NASANational Aeronautics & Space Administration (NASA) [NNX17AH98G] FX - This work was supported by the NASA grant [NNX17AH98G]. NR - 54 PU - TAYLOR & FRANCIS LTD PI - ABINGDON PA - 2-4 PARK SQUARE, MILTON PARK, ABINGDON OR14 4RN, OXON, ENGLAND]				What are patterns of gender and authorship in urban land science? Our bibliometric analysis shows that the proportion of women shrinks among highly productive, impactful, and senior authors, akin to a pyramid shape. First, women are only one in ten researchers with an h-index above the 95th percentile. Second, women are first authors on 20% of all influential papers cited more than one hundred ti…	Gender inequality, productivity, citation impact, women in science, urban remote sensing, PRODUCTIVITY, WOMEN, ACADEMIA, IMPACT	RAYYAN-INCLUSION: Kiran=>Included | RAYYAN-INCLUSION: Kiran=>Included	English
Included	Journal Article	Myers KR,Tham WY,Yin Y,Cohodes N,Thursby JG,Thursby MC,Schiffer P,Walsh JT,Lakhani KR,Wang D	Unequal effects of the COVID-19 pandemic on scientists	NATURE HUMAN BEHAVIOUR	2020	4	9	880-+		[Harvard Univ, Harvard Business Sch, Boston, MA 02115 USA, Harvard Univ, Lab Innovat Sci Harvard, Boston, MA 02115 USA, Northwestern Univ, Ctr Sci Sci & Innovat, Evanston, IL 60208 USA, Northwestern Univ, Northwestern Inst Complex Syst, Evanston, IL 60208 USA, Northwestern Univ, McCormick Sch Engn, Evanston, IL 60208 USA, Harvard Univ, Inst Quantitat Social Sci, Boston, MA 02115 USA, TyGeron Inst…	2020			COVID-19 has not affected all scientists equally. A survey of principal investigators indicates that female scientists, those in the 'bench sciences' and, especially, scientists with young children experienced a substantial decline in time devoted to research. This could have important short- and longer-term effects on their careers, which institution leaders and funders need to address carefully.	GENDER, PRODUCTIVITY, CAREERS	RAYYAN-INCLUSION: Kiran=>Included | RAYYAN-INCLUSION: Kiran=>Included	English
Included	Journal Article	Muric G,Lerman K,Ferrara E	Gender disparity in the authorship of biomedical research publications during the COVID-19 pandemic	arXiv. org	2021				Cornell University Library, arXiv.org	Ithaca	2021		http://server.proxy-ub.rug.nl/login?url=https://www.proquest.com/working-papers/gender-disparity-authorship-biomedical-research/docview/2412412121/se-2	Preliminary evidence suggests that women, including female researchers, are disproportionately affected by the COVID-19 pandemic in terms of unequal distribution of childcare, elderly care and other kinds of domestic and emotional labor. Sudden lockdowns and abrupt shifts in daily routines have disproportionate consequences on their productivity, which is reflected by a sudden drop in research ou…	Business And Economics, Banking And Finance, Digital Libraries, Physics and Society, Research, Gender aspects, Researchers, Journals, Biomedical data, Coronaviruses, Scientific papers, Pandemics, Gender, Amplification, COVID-19	Copyright - © 2021. This work is published under http://arxiv.org/licenses/nonexclusive-distrib/1.0/ (the “License”). Notwithstanding the ProQuest Terms and Conditions, you may use this content in accordance with the terms of the License. Last updated - 2021-05-19 | RAYYAN-INCLUSION: Kiran=>Included | RAYYAN-INCLUSION: Kiran=>Included	English
Included	Journal Article	Cui R,Ding H,Zhu F	Gender Inequality in Research Productivity During the COVID-19 Pandemic	arXiv. org	2021				Cornell University Library, arXiv.org	Ithaca	2021		http://server.proxy-ub.rug.nl/login?url=https://www.proquest.com/working-papers/gender-inequality-research-productivity-during/docview/2414911099/se-2	We study the disproportionate impact of the lockdown as a result of the COVID-19 outbreak on female and male academics' research productivity in social science. The lockdown has caused substantial disruptions to academic activities, requiring people to work from home. How this disruption affects productivity and the related gender equity is an important operations and societal question. We collec…	Business And Economics, Banking And Finance, Digital Libraries, General Economics, Economics, Productivity, Author productivity, Coronaviruses, Social sciences, COVID-19, Socioeconomic Factors	Copyright - © 2021. This work is published under http://arxiv.org/licenses/nonexclusive-distrib/1.0/ (the “License”). Notwithstanding the ProQuest Terms and Conditions, you may use this content in accordance with the terms of the License. Last updated - 2021-02-24 | RAYYAN-INCLUSION: Kiran=>Included | RAYYAN-INCLUSION: Kiran=>Included	English
Included	Journal Article	Ghaffarizadeh SA,Ghaffarizadeh SA,Behbahani AH,Mehdizadeh M,Olechowski A	Life and work of researchers trapped in the COVID-19 pandemic vicious cycle	BioRxiv	2021				Cold Spring Harbor Laboratory Press	Cold Spring Harbor	2021		http://server.proxy-ub.rug.nl/login?url=https://www.proquest.com/working-papers/life-work-researchers-trapped-covid-19-pandemic/docview/2506852282/se-2	Abstract COVID-19 has disrupted researchers’ work and posed challenges to their life routines. We have surveyed 740 researchers of which 66% experienced a decrease in productivity, 50% indicated increased workload, and 66% reported they have been feeling internal pressure to make progress. Those whose research required physical presence in a lab or the field experienced considerable disruption an…	Biology, COVID-19, Coronaviruses, Pandemics, Productivity, Medical research	Copyright - © 2021. This article is published under http://creativecommons.org/licenses/by-nc/4.0/ (“the License”). Notwithstanding the ProQuest Terms and Conditions, you may use this content in accordance with the terms of the License. Last updated - 2021-03-30 | RAYYAN-INCLUSION: Kiran=>Included | RAYYAN-INCLUSION: Kiran=>Included	English
Included	Journal Article	Ipe TS,Goel R,Howes L,Bakhtary S	The impact of COVID-19 on academic productivity by female physicians and researchers in transfusion medicine	TRANSFUSION	2021	61	6	1690-1693		[Univ Arkansas Med Sci, Dept Pathol & Lab Med, 4301 W Markham St,Slot 503, Little Rock, AR 72205 USA, Southern Illinois Univ, Sch Med, Dept Internal Med, Div Hematol,Oncol, Springfield, IL USA, Johns Hopkins Univ, Dept Pathol, Div Transfus Med, Baltimore, MD USA, Southern Illinois Univ, Sch Med, Med Lib, Springfield, IL USA, Univ Calif San Francisco, Dept Lab Med, San Francisco, CA USA NR - 8 PU …	2021			Background Several studies have highlighted the disparities in gender equity that exist in different medical specialties. The COVID-19 pandemic has further heightened the inequity faced by female physicians as they are challenged by increasing household and childcare duties in addition to their professional responsibilities. Given these hurdles, fewer women than men have published in various medi…	administration, transfusion service operations, transfusion practices (adult)	RAYYAN-INCLUSION: Kiran=>Included | RAYYAN-INCLUSION: Kiran=>Included	English
Included	Journal Article	Viglione G	Are women publishing less during the pandemic? Here's what the data say	NATURE	2020	581	7809	365-366			2020			Early analyses suggest that female academics are posting fewer preprints and starting fewer research projects than their male peers. How female academics are losing ground during the pandemic Early analyses suggest that female academics are posting fewer preprints and starting fewer research projects than their male peers. NR - 0 PU - NATURE RESEARCH PI - BERLIN PA - HEIDELBERGER PLATZ 3, BERLIN,…	Research management, Publishing	RAYYAN-INCLUSION: Kiran=>Included | RAYYAN-INCLUSION: Kiran=>Included	English
Included	Journal Article	Gao J,Yian Y,Myers KR,Lakhani KR,Wang D	Potentially long-lasting effects of the pandemic on scientists	Nature Communications	2021	12	1		Nature Publishing Group	Northwestern University, Center for Science of Science and Innovation, Evanston, USA (GRID:grid.16753.36) (ISNI:0000 0001 2299 3507); Northwestern University, Kellogg School of Management, Evanston, USA (GRID:grid.16753.36) (ISNI:0000 0001 2299 3507); Northwestern University, Northwestern Institute on Complex Systems, Evanston, USA (GRID:grid.16753.36) (ISNI:0000 0001 2299 3507) ; Northwestern Un…	2021		http://server.proxy-ub.rug.nl/login?url=https://www.proquest.com/scholarly-journals/potentially-long-lasting-effects-pandemic-on/docview/2586187216/se-2	Two surveys of principal investigators conducted between April 2020 and January 2021 reveal that while the COVID-19 pandemic’s initial impacts on scientists’ research time seem alleviated, there has been a decline in the rate of initiating new projects. This dimension of impact disproportionately affects female scientists and those with young children and appears to be homogeneous across fields. …	Sciences: Comprehensive Works, Scientists, Pandemics, COVID-19, Surveys, Long-term effects, Children	Copyright - © The Author(s) 2021. This work is published under http://creativecommons.org/licenses/by/4.0/ (the “License”). Notwithstanding the ProQuest Terms and Conditions, you may use this content in accordance with the terms of the License. Last updated - 2021-10-27 | RAYYAN-INCLUSION: Kiran=>Included | RAYYAN-INCLUSION: Kiran=>Included	English
Included	Journal Article	Hoggarth JA,Batty S,Bondura V,Creamer E,Ebert CE,Green-Mink K,Kieffer CL,Miller H,Ngonadi CV,Pilaar Birch SE,Pritchard C,Vacca K,Watkins TB,Zavodny E,Ventresca Miller AR	Impacts of the COVID-19 Pandemic on Women and Early Career Archaeologists	Heritage	2021	4	3	1681	MDPI AG	Department of Anthropology, Institute of Archaeology, Baylor University, One Bear Place #97173, Waco, TX 76798, USA ; Heritage Education Network Belize, Mile 71 George Price Highway, Cayo District, Belize; sylvia@heritagebelize.org ; Department of Anthropology, Columbia University, New York, NY 10027, USA; Valerie.bondura@columbia.edu ; College of Arts and Letters, Michigan State University, 600 …	2021	2571-9408	http://server.proxy-ub.rug.nl/login?url=https://www.proquest.com/scholarly-journals/impacts-covid-19-pandemic-on-women-early-career/docview/2576411666/se-2	The COVID-19 pandemic has had far-reaching impacts in all segments of life worldwide. While a variety of surveys have assessed the impacts of the pandemic in other fields, few studies have focused on understanding the short- and long-term impacts of the pandemic for archaeology. To assess these trends, we asked survey respondents (n = 570) if they experienced job loss and to rate the percentage o…	Archaeology, Computer Applications, archaeology, gender, career stage, COVID-19, Web sites, Coronaviruses, Museums, Employment, Social networks, United States, US	Copyright - © 2021 by the authors. Licensee MDPI, Basel, Switzerland. This article is an open access article distributed under the terms and conditions of the Creative Commons Attribution (CC BY) license (https://creativecommons.org/licenses/by/4.0/). Notwithstanding the ProQuest Terms and Conditions, you may use this content in accordance with the terms of the License. Last updated - 2021-09-26 …	English
Included	Journal Article	Yildirim TM,Eslen‐Ziya H,E	The differential impact of COVID‐19 on the work conditions of women and men academics during the lockdown	Gender, Work and Organization	2021	28		243-249	Blackwell Publishing Ltd.	Department of Media and Social Sciences, University of Stavanger ; Department of Media and Social Sciences, University of Stavanger Oxford	2021	0968-6673	http://server.proxy-ub.rug.nl/login?url=https://www.proquest.com/scholarly-journals/differential-impact-covid-19-on-work-conditions/docview/2489954523/se-2	That the COVID‐19 pandemic has affected the work conditions of large segments of society is in no doubt. A growing body of journalistic accounts raised the possibility that the lockdown caused by the pandemic has affected women and men in different ways, due mostly to the traditionally gendered division of labour in society. We attempt to test this oft‐cited argument by conducting an original sur…	Business And Economics, Management, academics, COVID‐19, daily routines, gender, housework, lockdown, Women, Housework, Work environment, COVID-19, Men, Pandemics, Children, Working conditions, Academic staff, Child care, Job satisfaction, Conditions, Mothers, Division of labor, Sexual division of labor	Copyright - © 2020. This article is published under http://creativecommons.org/licenses/by/4.0/ (the “License”). Notwithstanding the ProQuest Terms and Conditions, you may use this content in accordance with the terms of the License. Last updated - 2021-10-27 | RAYYAN-INCLUSION: Kiran=>Included | RAYYAN-INCLUSION: Kiran=>Included	English
Included	Journal Article	Staniscuaski F,A,Kmetzsch L,Z,Ona E,Reichert F,A,Soletti RC,Ludwig ZM,Lima EF,Neumann A,Schwartz IV,Mello-Carpes PB,Tamajusuku A,Sk R,Werneck F,P A,Ricachenevsky FK,Infanger C,Seixas A,Staats CC,Oliveira L	Gender, race and parenthood impact academic productivity during the COVID-19 pandemic: from survey to action	BioRxiv	2020				Cold Spring Harbor Laboratory Press	Cold Spring Harbor	2020		http://server.proxy-ub.rug.nl/login?url=https://www.proquest.com/working-papers/gender-race-parenthood-impact-academic/docview/2419902208/se-2	While the Coronavirus disease 2019 (COVID-19) pandemic is altering academia dynamics, those juggling remote work and domestic demands, including childcare, have already felt the impacts on productivity. Female authors are facing a decrease in papers submission rates since the beginning of the pandemic period. The reasons for this decline in women productivity need to be further investigated. Here…	Biology, Coronaviruses, COVID-19, Long-term effects, Pandemics, Gender, Productivity, Continental Population Groups	Copyright - © 2020. This article is published under http://creativecommons.org/licenses/by-nc-nd/4.0/ (“the License”). Notwithstanding the ProQuest Terms and Conditions, you may use this content in accordance with the terms of the License. Last updated - 2020-10-29 | RAYYAN-INCLUSION: Kiran=>Included | RAYYAN-INCLUSION: Kiran=>Included	English
Included	Journal Article	King MM,Frederickson M	The Pandemic Penalty: The gendered effects of COVID-19 on scientific productivity	IDEAS Working Paper Series from RePEc	2020				Federal Reserve Bank of St Louis	St. Louis	2020		http://server.proxy-ub.rug.nl/login?url=https://www.proquest.com/working-papers/pandemic-penalty-gendered-effects-covid-19-on/docview/2586738399/se-2	Academia provides a valuable case study for evaluating the effects of social forces on workplace productivity, using a concrete measure of output: the scholarly paper. Many academics -- especially women -- have experienced unprecedented challenges to scholarly productivity with the onset of the COVID-19 pandemic. In this paper, we analyze the gender composition of over 450,000 authorships of scho…	Business And Economics, Authorship, Coronaviruses, Pandemics, Gender, Productivity, COVID-19	Copyright - ©2020. Notwithstanding the ProQuest Terms and conditions, you may use this content in accordance with the associated terms available at https://research.stlouisfed.org/research_terms.html . Last updated - 2021-10-28 | RAYYAN-INCLUSION: Kiran=>Included | RAYYAN-INCLUSION: Kiran=>Included	English

## Sheet: Qualifiers 
Number	Qualifier missing
1	for both genders
2	some quantitative metric of academic productivity measured
3	for before the pandemic compared with during the pandemic
4	through primary research
5	full texts available
